# Supplementary material for: Identification of β-strand mediated protein–protein interaction inhibitors using ligand-directed fragment ligation
Source: Royal Society of Chemistry journal article supplement (doi:10.1039/d0sc05694d), 2021-01-01
Supplement: d0sc05694d5.pdf [file d0sc05694d5.pdf]

## Supporting information

### Identification of $\beta$ -strand mediated protein-protein interactions inhibitors using ligand-directed fragment ligation

Zsófia Hegedüs<sup>1</sup>, Fruzsina Hóbor<sup>2,3</sup>, Deborah K. Shoemark<sup>5</sup>, Sergio Celis<sup>1</sup>, Lu-Yun Lian<sup>4</sup>, Chi H. Trinh<sup>2,3</sup>, Richard B. Sessions<sup>5</sup>, Thomas A. Edwards<sup>2,3</sup>, Andrew J. Wilson<sup>1,2\*</sup>

<sup>1</sup>School of Chemistry, University of Leeds, Woodhouse Lane, Leeds LS2 9JT, UK, <sup>2</sup>Astbury Centre for Structural Molecular Biology, University of Leeds, Woodhouse Lane, Leeds LS2 9JT, UK, <sup>3</sup>School of Molecular and Cellular Biology, University of Leeds, Woodhouse Lane, Leeds LS2 9JT, UK, <sup>4</sup>Institute of Integrative Biology, University of Liverpool, Liverpool L69 3BX, UK, <sup>5</sup>School of Biochemistry, Biomedical Sciences Building, University of Bristol, Bristol, BS8 1TD.

## Table of contents

|                                                                                                                                                                                                                                                                                               |    |
|-----------------------------------------------------------------------------------------------------------------------------------------------------------------------------------------------------------------------------------------------------------------------------------------------|----|
| 1. Supplementary tables and figures .....                                                                                                                                                                                                                                                     | 4  |
| <b>Table S1.</b> Aldehyde library used for screening .....                                                                                                                                                                                                                                    | 4  |
| <b>Scheme S1.</b> Synthesis of hydrazones.....                                                                                                                                                                                                                                                | 17 |
| <b>Scheme S2.</b> Synthesis of hydrazones with hydrazide functionality on the N-terminus                                                                                                                                                                                                      | 17 |
| <b>Figure S1.</b> Molecular properties of the aldehyde fragment library .....                                                                                                                                                                                                                 | 18 |
| <b>Figure S2.</b> Rate of hydrazone exchange .....                                                                                                                                                                                                                                            | 19 |
| <b>Figure S3.</b> Fluorescence anisotropy direct titration of SHANK1 PDZ with FITC-Ahx-GKAP as tracer .....                                                                                                                                                                                   | 19 |
| <b>Figure S4.</b> Fluorescence anisotropy competition assay and fitted IC <sub>50</sub> values for GKAP PDZ-binding motif (PBM) (Ac-EAQTRL-COOH), Ac-TRL-OH and compounds <b>1-</b> , <b>2-</b> , <b>3-</b> , <b>4-A001</b> .....                                                             | 20 |
| <b>Figure S5.</b> Results of the fluorescence anisotropy competition screening of hydrazones formed from a) <b>1</b> , b) <b>2</b> , c) <b>3</b> , d) <b>4</b> at 50 μM concentration..                                                                                                       | 21 |
| <b>Figure S6.</b> Results of the fluorescence anisotropy competition screening of hydrazones formed from a) <b>1</b> , b) <b>2</b> , c) <b>3</b> , d) <b>4</b> at 10 μM concentration..                                                                                                       | 22 |
| <b>Figure S7.</b> Fluorescence anisotropy competition assay and fitted IC <sub>50</sub> values for GKAP PBM (Ac-EAQTRL-COOH) and the hybrid compounds selected for validation from the single point screens.....                                                                              | 23 |
| <b>Figure S8.</b> Fluorescence anisotropy competition assay and fitted IC <sub>50</sub> values for GKAP PBM (Ac-EAQTRL-COOH) and the hybrid compounds selected for validation from the single point screens.....                                                                              | 24 |
| <b>Figure S9.</b> Fluorescence anisotropy competition assay and fitted IC <sub>50</sub> values for GKAP PBM (Ac-EAQTRL-COOH) and the hybrid compounds selected for validation from the single point screens.....                                                                              | 24 |
| <b>Figure S10.</b> Results of the fluorescence anisotropy competition screening at 50 μM for hydrazones formed from a) <b>1</b> , b) <b>2</b> , c) <b>3</b> , d) <b>4</b> and at 10 μM concentration for e) <b>1</b> , f) <b>2</b> , g) <b>3</b> , h) <b>4</b> . with aldehydes A130-165..... | 25 |
| <b>Figure S11.</b> Fluorescence anisotropy competition assay and fitted IC <sub>50</sub> values for GKAP PBM (Ac-EAQTRL-COOH) and the hybrid compounds selected for validation from the single point screens.....                                                                             | 26 |
| <b>Figure S12.</b> Fluorescence anisotropy competition assay and fitted IC <sub>50</sub> values for GKAP PBM (Ac-EAQTRL-COOH) and the hybrid compounds selected for validation from the single point screens.....                                                                             | 26 |
| <b>Figure S13.</b> Results of the fluorescence anisotropy competition screening of the aldehyde fragments at 250 μM concentration..                                                                                                                                                           | 27 |
| <b>Figure S14.</b> Raw ITC data and fitted thermograms for the tested hydrazone hits..                                                                                                                                                                                                        | 28 |
| <b>Table S2.</b> Calculated group efficiency values (GE) for GKAP and the hydrazides relative to the core TRL motif.....                                                                                                                                                                      | 29 |

|                                                                                                                                                                    |    |
|--------------------------------------------------------------------------------------------------------------------------------------------------------------------|----|
| <b>Table S3.</b> Calculated group efficiency values (GE) for hydrazides relative to the core compound <b>3-A001</b> .....                                          | 30 |
| <b>Table S4.</b> Calculated group efficiency values (GE) for hydrazides relative to the core compound <b>4-A001</b> .....                                          | 31 |
| <b>Table S5.</b> Statistics for obtained crystal structures.....                                                                                                   | 32 |
| <b>Figure S15.</b> Co-crystal structure of SHANK1 PDZ (green) with compound <b>3-A047</b> ..                                                                       | 33 |
| <b>Figure S16.</b> Co-crystal structure of SHANK1 PDZ (green) with compound <b>4-A047</b> ..                                                                       | 34 |
| <b>Figure S17.</b> Co-crystal structure of SHANK1 PDZ (green) with compound <b>3-A048</b> ..                                                                       | 35 |
| <b>Figure S18.</b> Co-crystal structure of SHANK1 PDZ (green) with compound <b>4-A048</b> ..                                                                       | 36 |
| <b>Figure S19.</b> Overlays of co-crystal structures of GKAP in complex with SHANK1 PDZ with <b>3-A047</b> ; <b>3-A048</b> ; <b>4-A047</b> and <b>4-A048</b> ..... | 37 |
| <b>Table S6.</b> RMSD values of aligned crystal structures with 1Q3P.....                                                                                          | 38 |
| <b>Figure S20.</b> Fitted rotational correlation time of the SHANK1 residues with and without ligands.....                                                         | 39 |
| <b>Figure S21.</b> Molecular dynamics simulations for the the <b>3-A048</b> /SHANK1 interaction .....                                                              | 40 |
| <b>Figure S22.</b> Overlay of HSQC plots for <b>4-A047</b> with Ligand:protein ratio ranging from 1:1 to 100:1.....                                                | 41 |
| <b>Figure S23.</b> Mapping of chemical shift changes onto the structure of PSD95 PDZ1.                                                                             | 41 |
| <b>Table S7.</b> Concentration dependent shift changes of compound <b>4-A047</b> .....                                                                             | 42 |
| <b>Figure S24.</b> Fitted EC <sub>50</sub> value for compound <b>4-A047</b> .....                                                                                  | 42 |
| <b>Table S8.</b> Relative affinities using magnitude of shift changes of residues whose chemical shifts are significantly affected .....                           | 43 |
| 2. Materials and methods .....                                                                                                                                     | 44 |
| 2.1. Peptide Synthesis and purification .....                                                                                                                      | 44 |
| 2.1.1. General methods.....                                                                                                                                        | 44 |
| 2.1.1. Synthesis of peptide hydrazides.....                                                                                                                        | 45 |
| 2.2. Protein expression and purification .....                                                                                                                     | 45 |
| 2.3. Aldehyde library selection .....                                                                                                                              | 46 |
| 2.4. Fluorescence anisotropy.....                                                                                                                                  | 46 |
| 2.4.1. General comments .....                                                                                                                                      | 46 |
| 2.4.2. Direct titration.....                                                                                                                                       | 47 |
| 2.4.1. Competition assay.....                                                                                                                                      | 47 |

|                                             |    |
|---------------------------------------------|----|
| 2.4.2. Library screening .....              | 48 |
| 2.5. Isothermal titration calorimetry ..... | 49 |
| 2.6. Co-crystallization .....               | 49 |
| 2.7. Molecular dynamics simulations .....   | 50 |
| 2.8. NMR relaxation experiments.....        | 50 |
| 2.9. PSD95 PDZ1 Ligand Experiments.....     | 51 |
| 2.10. Compound characterization .....       | 52 |
| 2.11. References .....                      | 69 |

# 1. Supplementary tables and figures

**Table S1.** Aldehyde library used for screening

| #    | NAME                      | Structure                                                                           | Molweight | cLogP | H-Acc | H-Don | PSA   |
|------|---------------------------|-------------------------------------------------------------------------------------|-----------|-------|-------|-------|-------|
| A001 | Benzaldehyde              |    | 106.124   | 1.6   | 1     | 0     | 17.07 |
| A002 | Propionaldehyde           |    | 58.0796   | 0.29  | 1     | 0     | 17.07 |
| A003 | Butyraldehyde             |    | 72.1065   | 0.75  | 1     | 0     | 17.07 |
| A004 | 2-Methylpropionaldehyde   |    | 72.1065   | 0.51  | 1     | 0     | 17.07 |
| A005 | Isovaleraldehyde          |    | 86.1334   | 1.0   | 1     | 0     | 17.07 |
| A006 | Trimethylacetaldehyde     |  | 86.1334   | 1.1   | 1     | 0     | 17.07 |
| A007 | D-(+)-Glyceraldehyde      |  | 90.0776   | -1.7  | 3     | 2     | 57.53 |
| A008 | Pyrrole-2-carboxaldehyde  |  | 95.1007   | 0.37  | 2     | 1     | 32.86 |
| A009 | 3-Furancarboxaldehyde     |  | 96.0848   | 0.73  | 2     | 0     | 30.21 |
| A010 | 4-Imidazolecarboxaldehyde |  | 96.0888   | -0.19 | 3     | 1     | 45.75 |
| A011 | 3,3-Dimethylbutyraldehyde |  | 100.160   | 1.5   | 1     | 0     | 17.07 |
| A012 | methional                 |  | 104.173   | 0.44  | 1     | 0     | 42.37 |
| A013 | 2-Formylpyridine          |  | 107.112   | 0.65  | 2     | 0     | 29.96 |

| #    | NAME                                | Structure                                                                            | Molweight | cLogP  | H-Acc | H-Don | PSA   |
|------|-------------------------------------|--------------------------------------------------------------------------------------|-----------|--------|-------|-------|-------|
| A014 | p-Formylpyridine                    |    | 107.112   | 0.59   | 2     | 0     | 29.96 |
| A015 | 1-Methyl-2-imidazolecarboxaldehyde  |    | 110.116   | -0.22  | 3     | 0     | 34.89 |
| A016 | 5-Methylisoxazole-3-carboxaldehyde  |    | 111.100   | 0.46   | 3     | 0     | 43.1  |
| A017 | 5,6-Dihydro-2H-pyran-3-carbaldehyde |    | 112.128   | -0.086 | 2     | 0     | 26.3  |
| A018 | 2-Thiophenecarboxaldehyde           |    | 112.152   | 1.5    | 1     | 0     | 45.31 |
| A019 | Cyclohexanecarboxaldehyde           |   | 112.171   | 1.2    | 1     | 0     | 17.07 |
| A020 | Tetrahydro-2H-pyran-4-carbaldehyde  |  | 114.143   | 0.018  | 2     | 0     | 26.3  |
| A021 | 3-(Methylthio)butanal               |  | 118.199   | 0.85   | 1     | 0     | 42.37 |
| A022 | o-Tolualdehyde                      |  | 120.151   | 1.9    | 1     | 0     | 17.07 |
| A023 | Phenyl acetaldehyde                 |  | 120.151   | 1.3    | 1     | 0     | 17.07 |
| A024 | 4-Hydroxybenzaldehyde               |  | 122.123   | 1.2    | 2     | 1     | 37.3  |
| A025 | Salicylaldehyde                     |  | 122.123   | 1.2    | 2     | 1     | 37.3  |
| A026 | 4-Aminopyrimidine-5-carboxaldehyde  |  | 123.115   | -0.30  | 4     | 1     | 68.87 |

| #    | NAME                                                          | Structure                                                                            | Molweight | cLogP  | H-Acc | H-Don | PSA   |
|------|---------------------------------------------------------------|--------------------------------------------------------------------------------------|-----------|--------|-------|-------|-------|
| A027 | 45-Fluorobenzaldehyde                                         | 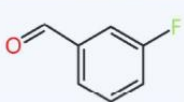   | 124.114   | 1.7    | 1     | 0     | 17.07 |
| A028 | 4,5-Dimethyl-2-furaldehyde                                    |    | 124.139   | 1.5    | 2     | 0     | 30.21 |
| A029 | 4-Methylthiazole-5-carboxaldehyde                             |    | 127.167   | 0.85   | 2     | 0     | 58.2  |
| A030 | 2-Aminothiazole-5-carboxaldehyde                              |    | 128.155   | 0.62   | 3     | 1     | 84.22 |
| A031 | 4-Cyanobenzaldehyde                                           |    | 131.134   | 1.4    | 2     | 0     | 40.86 |
| A032 | 4-Methoxybenzaldehyde                                         |   | 136.150   | 1.5    | 2     | 0     | 26.3  |
| A033 | 6-Methoxy-2-pyridinecarboxaldehyde                            |  | 137.138   | 0.93   | 3     | 0     | 39.19 |
| A034 | 4-Chlorobenzaldehyde                                          |  | 140.569   | 2.2    | 1     | 0     | 17.07 |
| A035 | 4,5-Dimethylthiazole-2-carboxaldehyde                         |  | 141.194   | 1.2    | 2     | 0     | 58.2  |
| A036 | 2-Chloroisonicotinaldehyde                                    |  | 141.557   | 1.3    | 2     | 0     | 29.96 |
| A037 | 4-chloropicolinaldehyde                                       |  | 141.557   | 1.3    | 2     | 0     | 29.96 |
| A038 | Ethyl 2-formyl-1-cyclopropanecarboxylate, predominantly trans |  | 142.153   | -0.016 | 3     | 0     | 43.37 |
| A039 | Indole-3-carboxaldehyde                                       |  | 145.161   | 1.6    | 2     | 1     | 32.86 |

| #    | NAME                                           | Structure                                                                           | Molweight | cLogP  | H-Acc | H-Don | PSA   |
|------|------------------------------------------------|-------------------------------------------------------------------------------------|-----------|--------|-------|-------|-------|
| A040 | 2-Benzofurancarboxaldehyde                     | 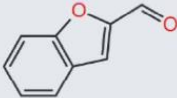   | 146.145   | 2.1    | 2     | 0     | 30.21 |
| A041 | 7-Azaindole-3-carboxaldehyde                   |    | 146.149   | 0.91   | 3     | 1     | 45.75 |
| A042 | 1H-Indazole-3-carboxaldehyde                   |    | 146.149   | 0.86   | 3     | 1     | 45.75 |
| A043 | (Z)-2-Phenyl-2-butenal                         |    | 146.188   | 1.8    | 1     | 0     | 17.07 |
| A044 | 1,2,4-Triazolo[1,5-a]pyridine-6-carboxaldehyde |    | 147.137   | -0.066 | 4     | 0     | 47.26 |
| A045 | 3-Phenylaziridine-2-carboxaldehyde dimer       |   | 147.176   | 0.42   | 2     | 1     | 39.01 |
| A046 | Mesitaldehyde                                  |  | 148.204   | 2.6    | 1     | 0     | 17.07 |
| A047 | 2-Formylbenzoic acid                           |  | 150.133   | 1.1    | 3     | 1     | 54.37 |
| A048 | 4-Carboxybenzaldehyde                          |  | 150.133   | 1.1    | 3     | 1     | 54.37 |
| A049 | Benzoyloxyacetaldehyde                         |  | 150.176   | 0.76   | 2     | 0     | 26.3  |
| A050 | (S)-(-)-Perillaldehyde                         |  | 150.220   | 2.2    | 1     | 0     | 17.07 |
| A051 | Safranal                                       |  | 150.220   | 1.8    | 1     | 0     | 17.07 |
| A052 | 2,4-Dihydroxy-6-methylbenzaldehyde             |  | 152.149   | 1.2    | 3     | 2     | 57.53 |



| #    | NAME                                          | Structure | Molweight | cLogP | H-Acc | H-Don | PSA   |
|------|-----------------------------------------------|-----------|-----------|-------|-------|-------|-------|
| A053 | 3-(5-Methyl-2-furyl)butanal                   |           | 152.192   | 1.7   | 2     | 0     | 30.21 |
| A054 | 4-(Methylthio)benzaldehyde                    |           | 152.217   | 2.1   | 1     | 0     | 42.37 |
| A055 | Citral                                        |           | 152.236   | 3.3   | 1     | 0     | 17.07 |
| A056 | 5-(Ethoxymethyl)furan-2-carboxaldehyde        |           | 154.164   | 1.1   | 3     | 0     | 39.44 |
| A057 | (R)-(+)-Citronellal                           |           | 154.252   | 3.1   | 1     | 0     | 17.07 |
| A058 | 3-Formyl-2-thienylboronic acid                |           | 155.969   | 1.1   | 3     | 2     | 85.77 |
| A059 | 1-Naphthaldehyde                              |           | 156.184   | 2.8   | 1     | 0     | 17.07 |
| A060 | 2-Naphthaldehyde                              |           | 156.184   | 2.8   | 1     | 0     | 17.07 |
| A061 | Quinaldaldehyde                               |           | 157.172   | 2.0   | 2     | 0     | 29.96 |
| A062 | N-Boc-2-aminoacetaldehyde                     |           | 159.184   | 0.27  | 4     | 1     | 55.4  |
| A063 | 1-Methyl-1H-indole-6-carboxaldehyde           |           | 159.187   | 1.8   | 2     | 0     | 22    |
| A064 | 2-Chloro-3-fluoropyridine-4-carboxaldehyde    |           | 159.547   | 1.4   | 2     | 0     | 29.96 |
| A065 | 1-methylpyrrolo[2,3-b]pyridine-3-carbaldehyde |           | 160.176   | 1.0   | 3     | 0     | 34.89 |

| #    | NAME                                                           | Structure                                                                           | Molweight | cLogP | H-Acc | H-Don | PSA   |
|------|----------------------------------------------------------------|-------------------------------------------------------------------------------------|-----------|-------|-------|-------|-------|
| A066 | Thianaphthene-3-carboxaldehyde                                 | 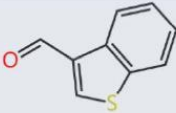   | 162.212   | 2.4   | 1     | 0     | 45.31 |
| A067 | Benzothiazole-2-carboxaldehyde                                 |    | 163.200   | 1.6   | 2     | 0     | 58.2  |
| A068 | 3-Formyl-5-methylphenylboronic acid                            |    | 163.967   | 1.7   | 3     | 2     | 57.53 |
| A069 | 2,5-Dimethoxybenzaldehyde                                      |    | 166.175   | 1.5   | 3     | 0     | 35.53 |
| A070 | 2,4-Dimethoxybenzaldehyde                                      |    | 166.175   | 1.5   | 3     | 0     | 35.53 |
| A071 | Ethyl 4-formylpyrrole-2-carboxylate                            |   | 167.163   | 0.69  | 4     | 1     | 59.16 |
| A072 | (5-Methyl-2,4-dioxo-3,4-dihydro-1(2H)-pyrimidinyl)acetaldehyde |  | 168.152   | -1.1  | 5     | 1     | 66.48 |
| A073 | Thieno[3,2-b]thiophene-2-carboxaldehyde                        |  | 168.240   | 2.2   | 1     | 0     | 73.55 |
| A074 | (R)-1,4-Dioxaspiro[4.5]decane-2-carboxaldehyde                 |  | 170.207   | 0.39  | 3     | 0     | 35.53 |
| A075 | Hydroxycitronellal                                             |  | 172.267   | 2.1   | 2     | 1     | 37.3  |
| A076 | 4-(Trifluoromethyl)benzaldehyde                                |  | 174.121   | 2.4   | 1     | 0     | 17.07 |
| A077 | 5-Methoxyindole-3-carboxaldehyde                               |  | 175.186   | 1.6   | 3     | 1     | 42.09 |
| A078 | 4-(tert-Butyloxy)benzaldehyde                                  |  | 178.230   | 2.7   | 2     | 0     | 26.3  |

| #    | NAME                                                 | Structure                                                                           | Molweight | cLogP | H-Acc | H-Don | PSA   |
|------|------------------------------------------------------|-------------------------------------------------------------------------------------|-----------|-------|-------|-------|-------|
| A079 | 5-Chloroindole-3-carboxaldehyde                      | 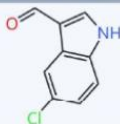   | 179.606   | 2.2   | 2     | 1     | 32.86 |
| A080 | 1-(2-Tetrahydropyranyl)-1H-pyrazole-5-carboxaldehyde |    | 180.206   | 0.83  | 4     | 0     | 44.12 |
| A081 | 2,4-Dichlorothiazole-5-carboxaldehyde                |    | 182.030   | 2.3   | 2     | 0     | 58.2  |
| A082 | 4-Biphenylcarbaldehyde                               |    | 182.221   | 3.3   | 1     | 0     | 17.07 |
| A083 | 4-(2-Pyridinyl)benzaldehyde                          |    | 183.209   | 2.3   | 2     | 0     | 29.96 |
| A084 | 1-(4-Methylphenyl)pyrrole-2-carbaldehyde             |   | 185.225   | 2.2   | 2     | 0     | 22    |
| A085 | 2-Chloro-6-nitrobenzaldehyde                         |  | 185.566   | 1.3   | 4     | 0     | 62.89 |
| A086 | 3,5-Difluoro-4-formylphenylboronic acid              |  | 185.921   | 1.5   | 3     | 2     | 57.53 |
| A087 | 6-Bromo-3-pyridinecarboxaldehyde                     |  | 186.008   | 1.4   | 2     | 0     | 29.96 |
| A088 | 5-Bromonicotinaldehyde                               |  | 186.008   | 1.3   | 2     | 0     | 29.96 |
| A089 | 2-Bromoisonicotinaldehyde                            |  | 186.008   | 1.4   | 2     | 0     | 29.96 |
| A090 | 3-Methyl-1-phenyl-1H-pyrazole-4-carboxaldehyde       |  | 186.213   | 1.2   | 3     | 0     | 34.89 |
| A091 | 2-Butyl-5-chloro-1H-imidazole-4-carboxaldehyde       |  | 186.641   | 2.1   | 3     | 1     | 45.75 |

| #    | NAME                                      | Structure                                                                           | Molweight | cLogP | H-Acc | H-Don | PSA   |
|------|-------------------------------------------|-------------------------------------------------------------------------------------|-----------|-------|-------|-------|-------|
| A092 | 4-Phenylthiophene-2-carboxaldehyde        | 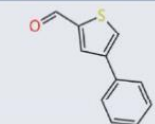   | 188.250   | 3.1   | 1     | 0     | 45.31 |
| A093 | 6-(3-Thienyl)pyridine-2-carboxaldehyde    |    | 189.238   | 2.2   | 2     | 0     | 58.2  |
| A094 | 4-(1-Piperidinyl)benzaldehyde             |    | 189.257   | 2.4   | 2     | 0     | 20.31 |
| A095 | 5-Bromothiophene-3-carboxaldehyde         |    | 191.048   | 2.3   | 1     | 0     | 45.31 |
| A096 | 4-Bromothiazole-2-carboxaldehyde          |    | 192.036   | 1.2   | 2     | 0     | 58.2  |
| A097 | 2-Bromothiazole-5-carboxaldehyde          |   | 192.036   | 1.7   | 2     | 0     | 58.2  |
| A098 | 2-Bromothiazole-4-carboxaldehyde          |  | 192.036   | 1.7   | 2     | 0     | 58.2  |
| A099 | 4-Diethylaminosalicylaldehyde             |  | 193.245   | 2.0   | 3     | 1     | 40.54 |
| A100 | 6-Nitropiperonal                          |  | 195.130   | 0.78  | 6     | 0     | 81.35 |
| A101 | Trimethoxybenzaldehyde                    |  | 196.201   | 1.4   | 4     | 0     | 44.76 |
| A102 | 4-Phenoxybenzaldehyde                     |  | 198.220   | 3.0   | 2     | 0     | 26.3  |
| A103 | Boc-L-prolinal                            |  | 199.249   | 1.2   | 4     | 0     | 46.61 |
| A104 | 1-Allyl-2-methyl-1H-indole-3-carbaldehyde |  | 199.252   | 2.7   | 2     | 0     | 22    |

| #    | NAME                                                                     | Structure                                                                           | Molweight | cLogP | H-Acc | H-Don | PSA   |
|------|--------------------------------------------------------------------------|-------------------------------------------------------------------------------------|-----------|-------|-------|-------|-------|
| A105 | 2-Bromo-5-hydroxybenzaldehyde                                            | 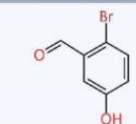   | 201.019   | 2.0   | 2     | 1     | 37.3  |
| A106 | 4-Bromo-2-fluorobenzaldehyde                                             |    | 203.010   | 2.4   | 1     | 0     | 17.07 |
| A107 | N-Benzylpiperidine-4-carboxaldehyde                                      |    | 203.284   | 1.5   | 2     | 0     | 20.31 |
| A108 | 2-Chloro-6-methylquinoline-3-carboxaldehyde                              |    | 205.644   | 3.0   | 2     | 0     | 29.96 |
| A109 | N-(3-Formyl-2-pyridinyl)-2,2-dimethylpropanamide                         |    | 206.244   | 1.9   | 4     | 1     | 59.06 |
| A110 | Methyl 3-formyl-4-nitrobenzoate                                          |   | 209.157   | 0.58  | 6     | 0     | 89.19 |
| A111 | 3-Formyl-6-isopropylchromone                                             |  | 216.235   | 1.9   | 3     | 0     | 43.37 |
| A112 | 2,3-Dimethoxy-1-naphthaldehyde                                           |  | 216.235   | 2.6   | 3     | 0     | 35.53 |
| A113 | 2-Methyl-N-ethyl-N-(2-cyanoethyl)-4-aminobenzaldehyde                    |  | 216.283   | 2.3   | 3     | 0     | 44.1  |
| A114 | 2,3,6,7-Tetrahydro-8-hydroxy-1H,5H-benzo[ij]quinolizine-9-carboxaldehyde |  | 217.267   | 2.2   | 3     | 1     | 40.54 |
| A115 | 4,6-Dichloro-2-(methylthio)pyrimidine-5-carboxaldehyde                   |  | 223.083   | 2.2   | 3     | 0     | 68.15 |
| A116 | 5-Bromoindole-3-carboxaldehyde                                           |  | 224.057   | 2.4   | 2     | 1     | 32.86 |
| A117 | 6-Bromo-1H-indazole-4-carboxaldehyde                                     |  | 225.045   | 1.5   | 3     | 1     | 45.75 |

| #    | NAME                                                | Structure | Molweight | cLogP  | H-Acc | H-Don | PSA   |
|------|-----------------------------------------------------|-----------|-----------|--------|-------|-------|-------|
| A118 | 3-Bromo-5-nitrobenzaldehyde                         |           | 230.017   | 1.4    | 4     | 0     | 62.89 |
| A119 | 1-(Phenylsulfonyl)-2-pyrrolecarboxaldehyde          |           | 235.262   | 0.62   | 4     | 0     | 64.52 |
| A120 | 3-Bromobenzothiophene-2-carboxaldehyde              |           | 241.108   | 3.2    | 1     | 0     | 45.31 |
| A121 | 3,5-Di-tert-butyl-2-methoxybenzaldehyde             |           | 248.365   | 4.7    | 2     | 0     | 26.3  |
| A122 | 3,5-Dibromopyridine-2-carboxaldehyde                |           | 264.904   | 2.1    | 2     | 0     | 29.96 |
| A123 | 3,4-Dibromothiophene-2-carboxaldehyde               |           | 269.944   | 2.9    | 1     | 0     | 45.31 |
| A124 | 5'-Bromo-2,2'-bithiophene-5-carboxaldehyde          |           | 273.174   | 4.3    | 1     | 0     | 73.55 |
| A125 | 5-[2-Chloro-5-(trifluoromethyl)phenyl]furfural      |           | 274.625   | 4.0    | 2     | 0     | 30.21 |
| A126 | 3-Hydroxy-2-iodo-4-methoxybenzaldehyde              |           | 278.041   | 1.6    | 3     | 1     | 46.53 |
| A127 | 5-Chloro-2-hydroxy-3-iodobenzaldehyde               |           | 282.460   | 2.3    | 2     | 1     | 37.3  |
| A128 | 1-Boc-4-(2-formylphenyl)piperazine                  |           | 290.362   | 2.8    | 5     | 0     | 49.85 |
| A129 | 5-(4-Bromophenyl)-2-chloropyridine-3-carboxaldehyde |           | 296.551   | 3.7    | 2     | 0     | 29.96 |
| A130 | 5-Formyl-1H-pyrrole-2-carboxylic acid               |           | 139.110   | -0.091 | 4     | 2     | 70.16 |



| #    | NAME                                                  | Structure                                                                           | Molweight | cLogP | H-Acc | H-Don | PSA   |
|------|-------------------------------------------------------|-------------------------------------------------------------------------------------|-----------|-------|-------|-------|-------|
| A131 | 5-Formyl-2-furoic acid                                | 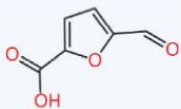   | 140.094   | 0.32  | 4     | 1     | 67.51 |
| A132 | 4-Formyl-1H-pyrazole-3-carboxylic acid                |    | 140.098   | -1.0  | 5     | 2     | 83.05 |
| A133 | 3-Formylbenzoic acid                                  |    | 150.133   | 1.1   | 3     | 1     | 54.37 |
| A134 | 2-(4-Formyl-1H-imidazol-1-yl)acetic acid              |    | 154.125   | -1.3  | 5     | 1     | 72.19 |
| A135 | 5-Formyl-2-thiophenecarboxylic acid                   |    | 156.161   | 1.0   | 3     | 1     | 82.61 |
| A136 | 5-Formylsalicylic acid                                |   | 166.132   | 0.73  | 4     | 2     | 74.6  |
| A137 | 5-Formyl-2,4-dimethyl-1H-pyrrole-3-carboxylic acid    |  | 167.163   | 0.60  | 4     | 2     | 70.16 |
| A138 | 2-fluoro-5-formylbenzoic acid                         |  | 168.123   | 1.2   | 3     | 1     | 54.37 |
| A139 | 4-fluoro-3-formyl-benzoic acid                        |  | 168.123   | 1.2   | 3     | 1     | 54.37 |
| A140 | 4-Formylcinnamic acid, predominantly trans            |  | 176.171   | 1.4   | 3     | 1     | 54.37 |
| A141 | 2-formylcinnamic acid                                 |  | 176.171   | 1.4   | 3     | 1     | 54.37 |
| A142 | 5-formyl-2-methoxybenzoic acid                        |  | 180.159   | 1.0   | 4     | 1     | 63.6  |
| A143 | 4-Formyl-1,2,5-trimethyl-1H-pyrrole-3-carboxylic acid |  | 181.190   | 0.73  | 4     | 1     | 59.3  |

| #    | NAME                                                            | Structure                                                                           | Molweight | cLogP | H-Acc | H-Don | PSA   |
|------|-----------------------------------------------------------------|-------------------------------------------------------------------------------------|-----------|-------|-------|-------|-------|
| A144 | 5-chloro-2-formyl-benzoic acid                                  | 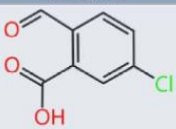   | 184.578   | 1.7   | 3     | 1     | 54.37 |
| A145 | 3-formyl-1H-indole-7-carboxylic acid                            |    | 189.170   | 1.1   | 4     | 2     | 70.16 |
| A146 | 4-Formylquinoline-8-carboxylic acid                             |    | 201.181   | 1.4   | 4     | 1     | 67.26 |
| A147 | 4-(2-Formyl-1H-pyrrol-1-yl)benzoic acid                         |    | 215.207   | 1.3   | 4     | 1     | 59.3  |
| A148 | 3-(3-Formyl-1H-indol-1-yl)propanoic acid                        |    | 217.223   | 1.2   | 4     | 1     | 59.3  |
| A149 | 2-(3-formyl-1H-indol-1-yl)propanoic acid                        |   | 217.223   | 1.2   | 4     | 1     | 59.3  |
| A150 | 6-Formyl-2,4-dimethyl-4H-thieno[3,2-b]pyrrole-5-carboxylic acid |  | 223.251   | 1.4   | 4     | 1     | 87.54 |
| A151 | 3'-Formyl-biphenyl-3-carboxylic acid                            |  | 226.230   | 2.7   | 3     | 1     | 54.37 |
| A152 | 2'-Formyl[1,1'-biphenyl]-2-carboxylic acid                      |  | 226.230   | 2.7   | 3     | 1     | 54.37 |
| A153 | 4'-formyl-biphenyl-4-carboxylic acid                            |  | 226.230   | 2.7   | 3     | 1     | 54.37 |
| A154 | 2-(4-formylphenyl)isonicotinic acid                             |  | 227.218   | 1.8   | 4     | 1     | 67.26 |
| A155 | 4-(5-Formyl-2-furyl)-2-hydroxybenzoic acid                      |  | 232.191   | 1.7   | 5     | 2     | 87.74 |
| A156 | 4-(3-methoxy-4-formyl)phenoxybutyric acid                       |  | 238.238   | 1.5   | 5     | 1     | 72.83 |



| #    | NAME                                                           | Structure                                                                           | Molweight | cLogP | H-Acc | H-Don | PSA   |
|------|----------------------------------------------------------------|-------------------------------------------------------------------------------------|-----------|-------|-------|-------|-------|
| A157 | 4-(3-formyl-2,5-dimethyl-1H-pyrrol-1-yl)benzenecarboxylic acid | 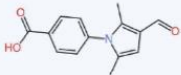   | 243.261   | 2.1   | 4     | 1     | 59.3  |
| A158 | 3-Formyl-1-isobutyl-1H-indole-4-carboxylic acid                |    | 245.277   | 2.2   | 4     | 1     | 59.3  |
| A159 | 4-chloro-3-(5-formyl-furan-2-yl)-benzoic acid                  |    | 250.637   | 2.6   | 4     | 1     | 67.51 |
| A160 | 3-(3-formylphenoxy)methylbenzoic acid                          |    | 256.256   | 2.4   | 4     | 1     | 63.6  |
| A161 | 2-(3-formylphenoxy)-2-phenylacetic acid                        |    | 256.256   | 2.0   | 4     | 1     | 63.6  |
| A162 | 3-(3-Formyl-2,5-dimethyl-pyrrol-1-yl)-2-methylbenzoic acid     |   | 257.288   | 2.4   | 4     | 1     | 59.3  |
| A163 | (2-Chloro-6-ethoxy-4-formylphenoxy)acetic acid                 |  | 258.656   | 1.6   | 5     | 1     | 72.83 |
| A164 | 5-(4-formylphenoxy)methyl-3-methylfuran-2-carboxylic acid      |  | 260.244   | 2.0   | 5     | 1     | 76.74 |
| A165 | 5-((3-Formyl-1H-indol-1-yl)methyl)furan-2-carboxylic acid      |  | 269.255   | 1.9   | 5     | 1     | 72.44 |

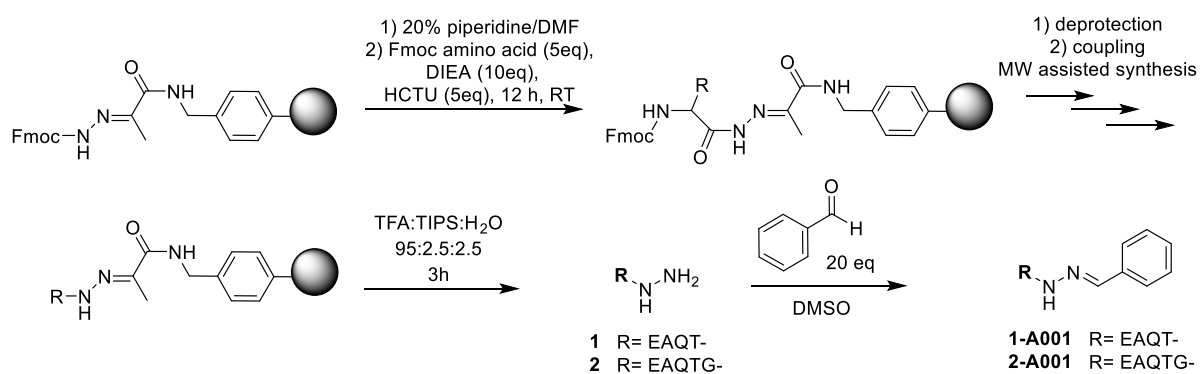

**Scheme S1.** Synthesis of hyrazones with hydrazide functionality on the C-terminus (compounds **1** and **2** and the corresponding hydrazone **1-A001** and **2-A001**) using Fmoc-NHN=Pyv Resin (Iris Biotech).

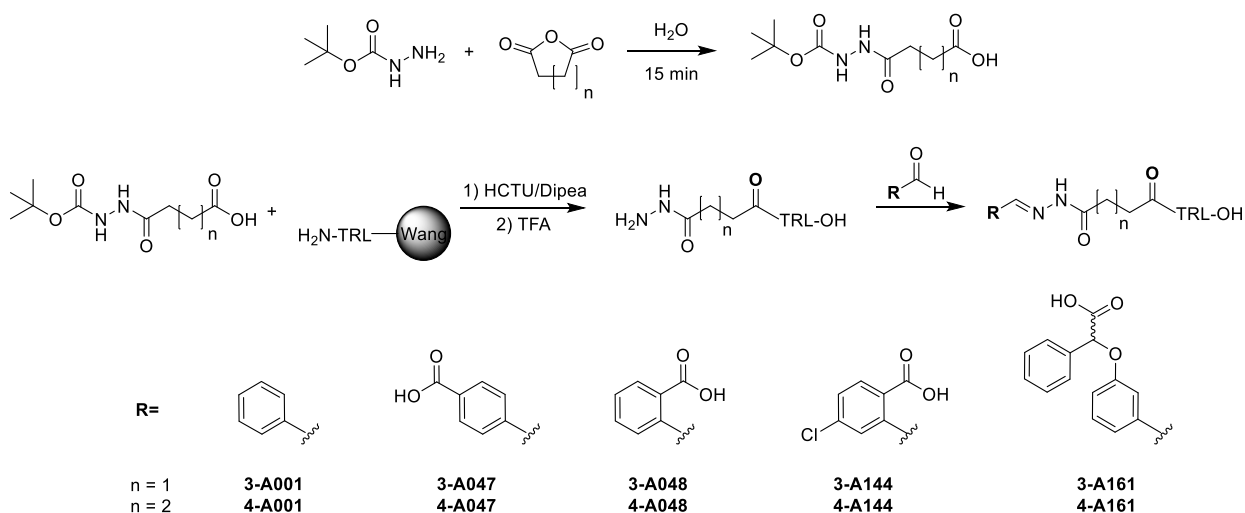

**Scheme S2.** Synthesis of hyrazones with hydrazide functionality on the N-terminus. The absolute configuration and enantiomeric purity of fragment A161 is unknown.

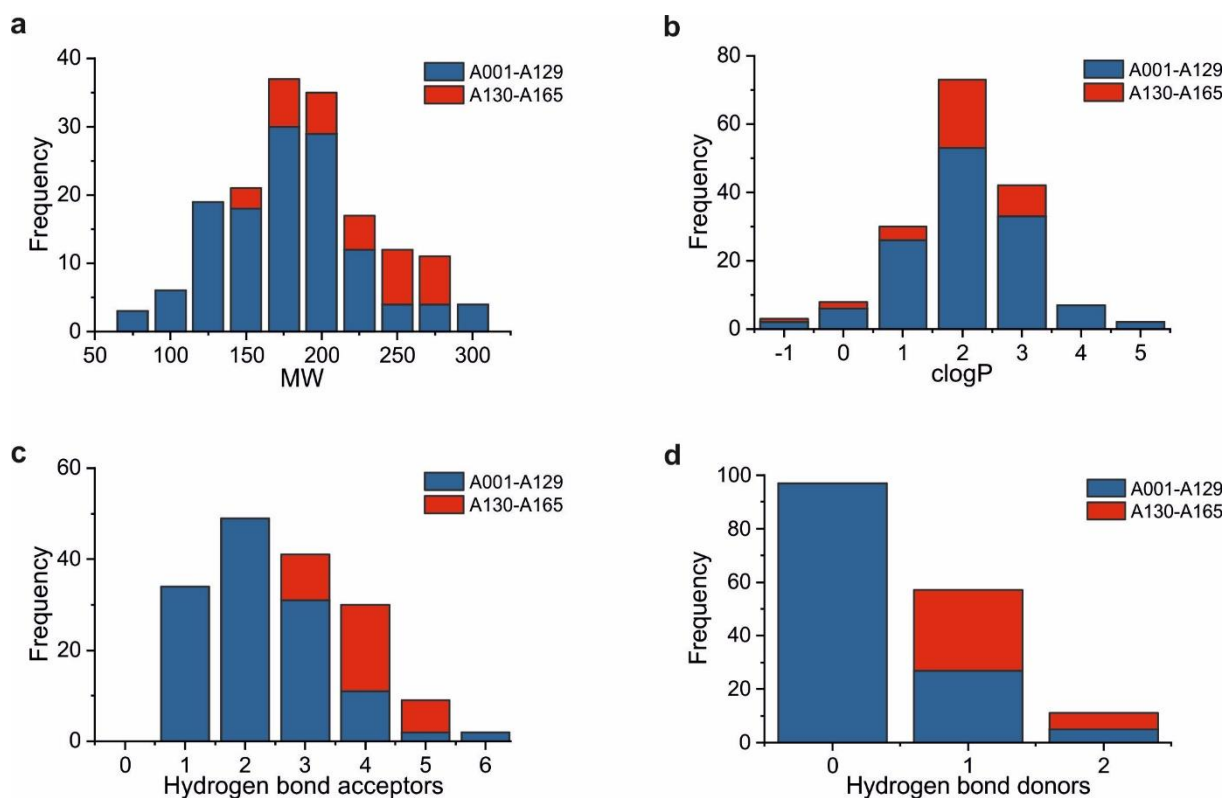

**Figure S1.** Molecular properties of the aldehyde fragment library: a) molecular weight distribution, b) clogP distribution c) number of hydrogen bond acceptors and d) number of hydrogen bond donors. Blue bars correspond to the diverse aldehyde set (A001-A129), red bars correspond to a subset of compounds having additional carboxylic acid functionality (A130-165). Diversity was assessed using 2D molecular descriptors (FragFp, DataWarrior<sup>1</sup>), which resulted in 119 clusters with 0.85 Tanimoto similarity.

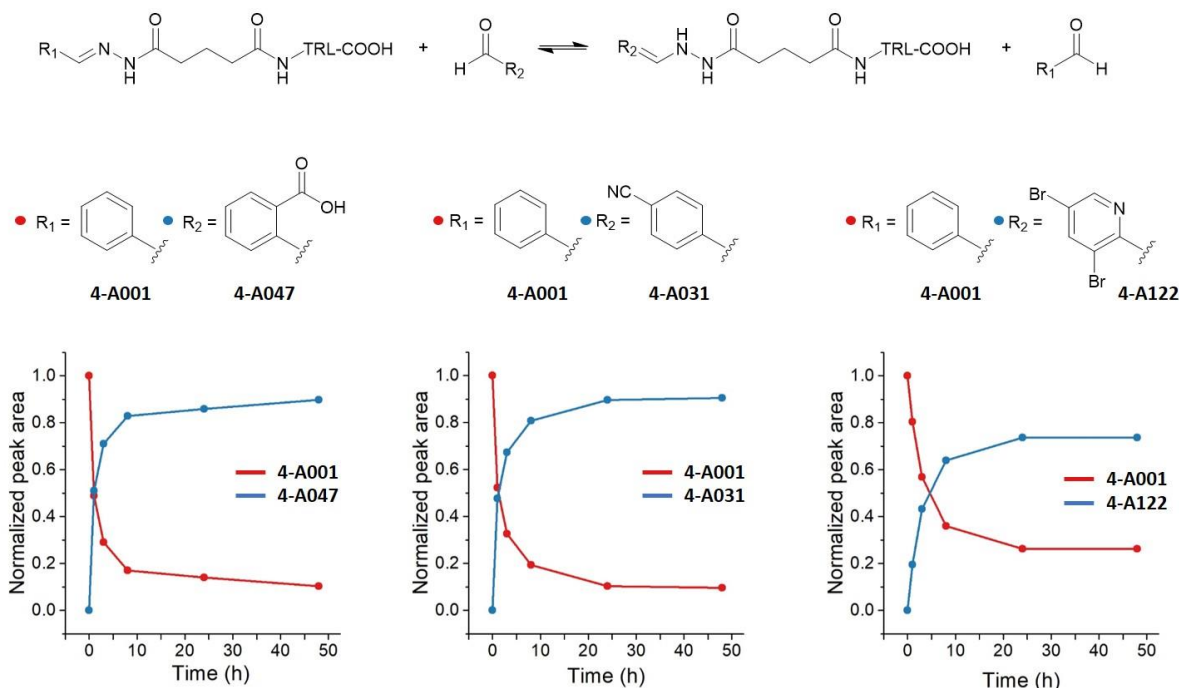

**Figure S2.** Rate of hydrazone exchange in 50 mM ammonium-acetate ( $NH_4Ac$ ), pH 6.5, 10 mM aniline buffer using 100  $\mu M$  compound **4-A001** and 5 equivalents of three different aldehydes (corresponding to  $R_2$  groups) at room temperature. Hydrazone exchange was monitored by LC-MS; peaks for extracted ion chromatograms were integrated and normalized. Red lines represent the decreasing concentration of compound **4-A001**, blue lines represent the formation of the new hydrazone.

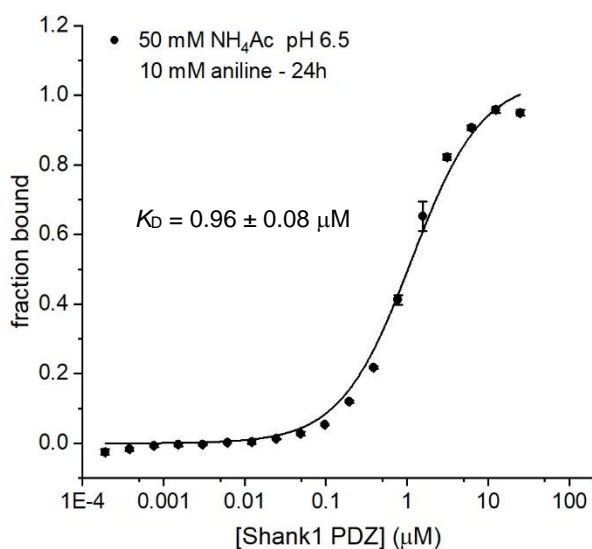

**Figure S3.** Fluorescence anisotropy direct titration of SHANK1 PDZ in 50 mM  $NH_4Ac$ , pH 6.5 10 mM aniline containing buffer using 50 nM FITC-Ahx-GKAP as tracer. Plate was read after 24 hr incubation at room temperature.

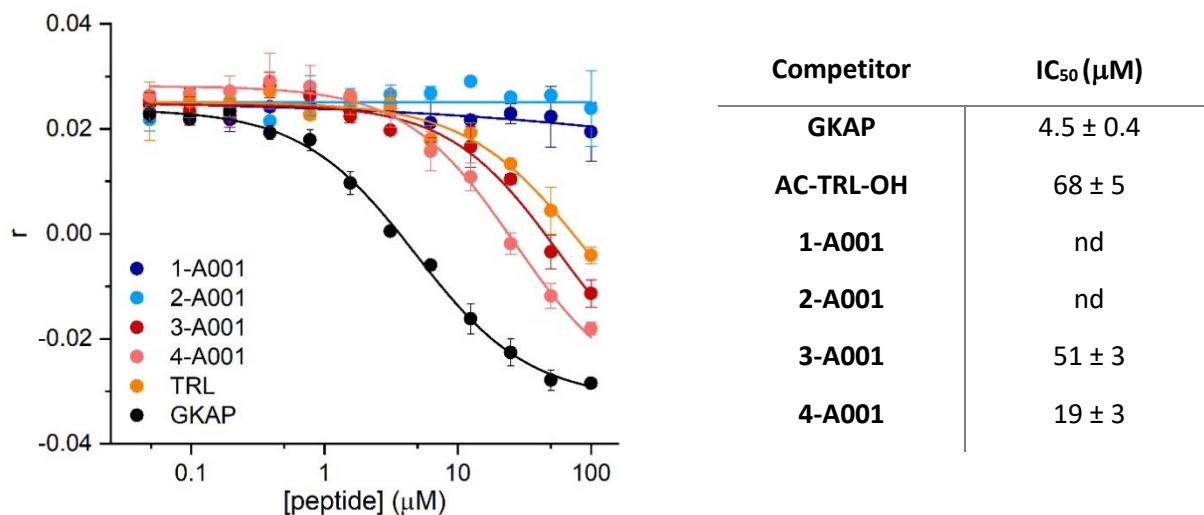

**Figure S4.** Fluorescence anisotropy competition assay and fitted IC<sub>50</sub> values for GKAP PDZ-binding motif (PBM) (Ac-EAQTRL-COOH), Ac-TRL-OH and compounds **1-**, **2-**, **3-**, **4-A001** in 50 mM NH<sub>4</sub>Ac, pH 6.5 10 mM aniline containing buffer using 1 μM Shank1 PDZ and 10 nM FITC-Ahx-TRL-COOH tracer; plates were read immediately at room temperature.

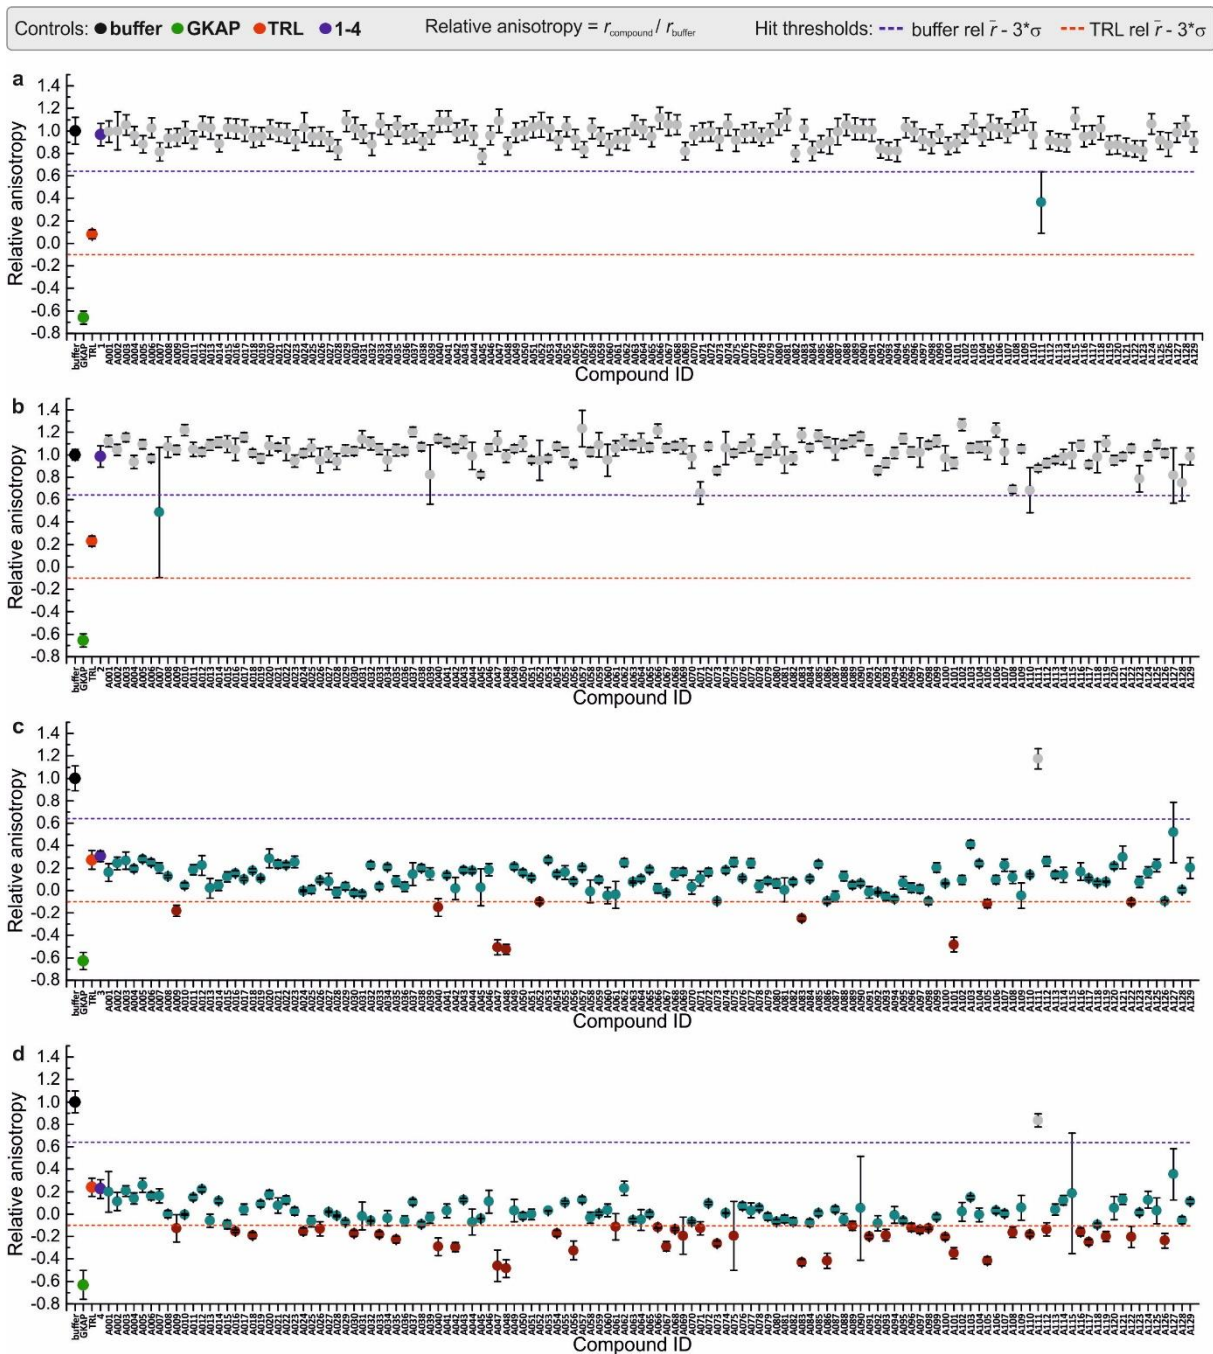

**Figure S5.** Results of the fluorescence anisotropy competition screening of hydrazones formed from a) **1**, b) **2**, c) **3**, d) **4** at 50  $\mu\text{M}$  concentration. Compounds incubated with 5 equivalents of aldehydes (A001-A129) individually, for 24 hours before tracer addition. Assay was performed in 50 mM  $\text{NH}_4\text{Ac}$  buffer, pH 6.5, 10 mM aniline using 1  $\mu\text{M}$  final protein concentration and 10 nM FITC-Ahx-TRL-COOH as tracer at room temperature. All assays included a buffer (black), GKAP PBM (Ac-EAQTRL-COOH) (green) and TRL (red) control. Anisotropy is expressed relative to the buffer control, where no competitor is present. Each dot on the graph represents the relative activity of a hybrid compound. Hit thresholds were defined as i) buffer  $r_{\text{rel}} - 3\sigma$  (blue dashed line) and ii) TRL  $r_{\text{rel}} - 3\sigma$  (red dashed line). Hybrids reaching these thresholds are colored cyan and red respectively. Error bars represent the standard deviation of sample duplicates.



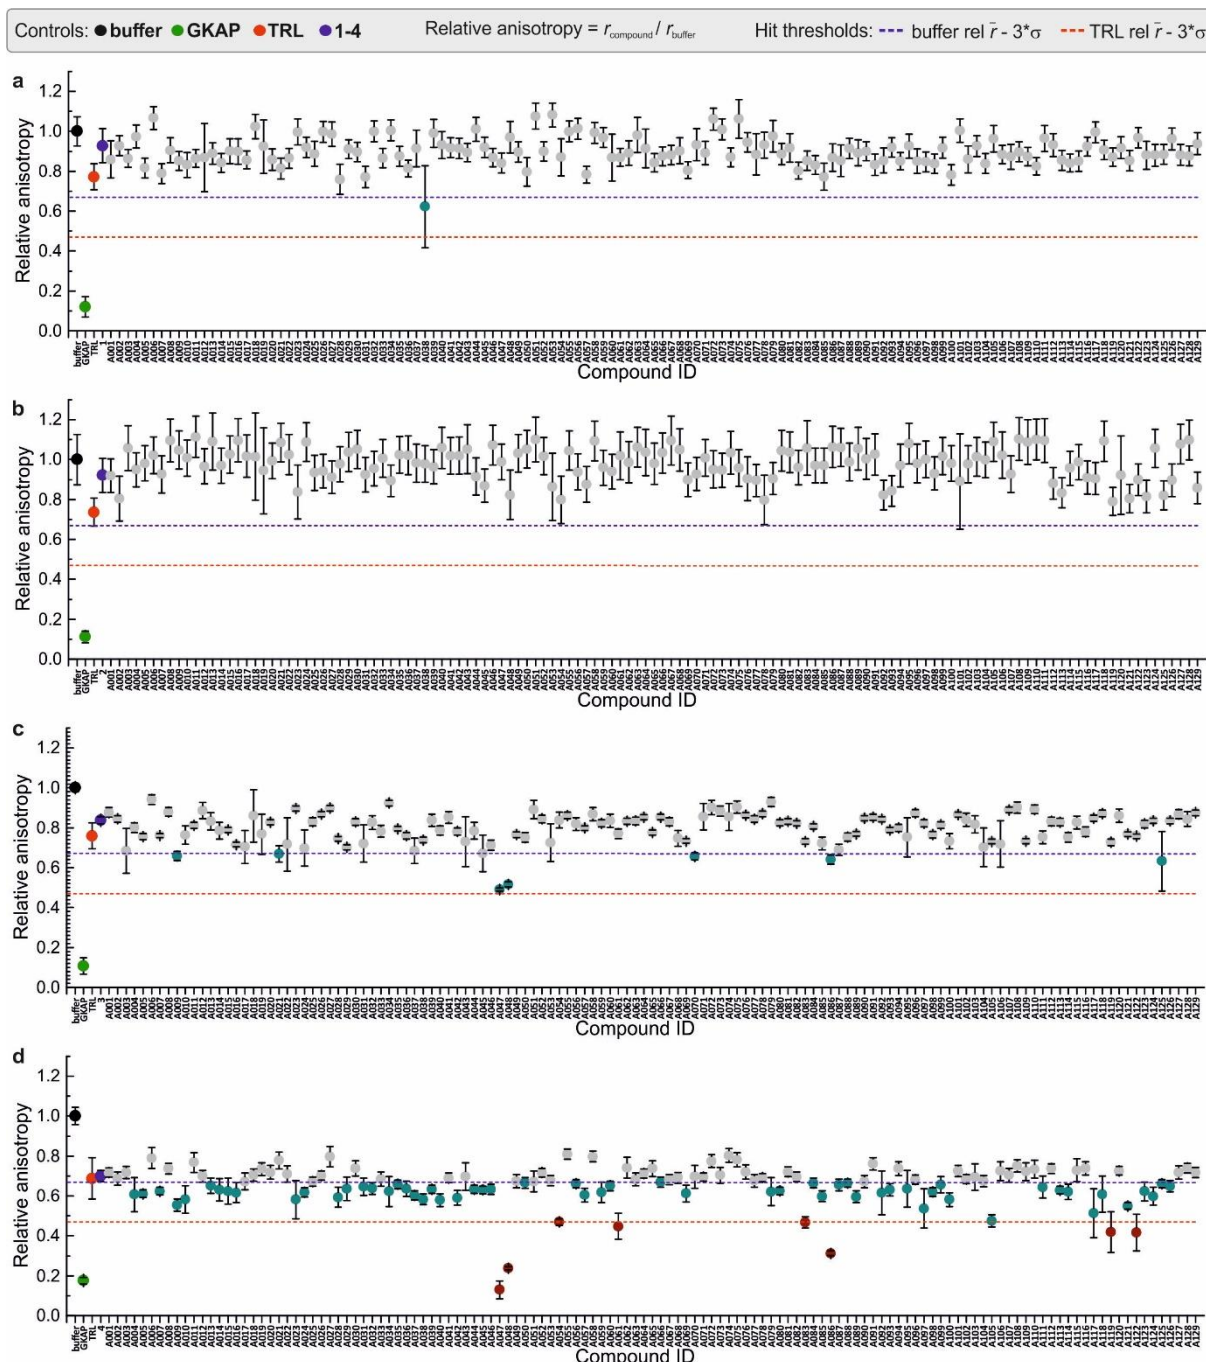

**Figure S6.** Results of the fluorescence anisotropy competition screening of hydrazones formed from a) **1**, b) **2**, c) **3**, d) **4** at 10  $\mu\text{M}$  concentration. Compounds incubated with 5 equivalents of aldehydes (A001-A129) individually, for 24 hours before tracer addition. Assay was performed in 50 mM  $\text{NH}_4\text{Ac}$  buffer, pH 6.5, 10 mM aniline using 1  $\mu\text{M}$  final protein concentration and 10 nM FITC-Ahx-TRL-COOH as tracer at room temperature. All assays included a buffer (black), GKAP PBM (Ac-EAQTRL-COOH) (green) and TRL (red) control. Anisotropy is expressed relative to the buffer control, where no competitor is present. Each dot on the graph represents the relative activity of a hybrid compound. Hit thresholds were defined as i) buffer  $r_{\text{rel}} - 3\sigma$  (blue dashed line) and ii) TRL  $r_{\text{rel}} - 3\sigma$  (red dashed line). Hybrids reaching these thresholds are colored cyan and red respectively. Error bars represent the standard deviation of sample duplicates.

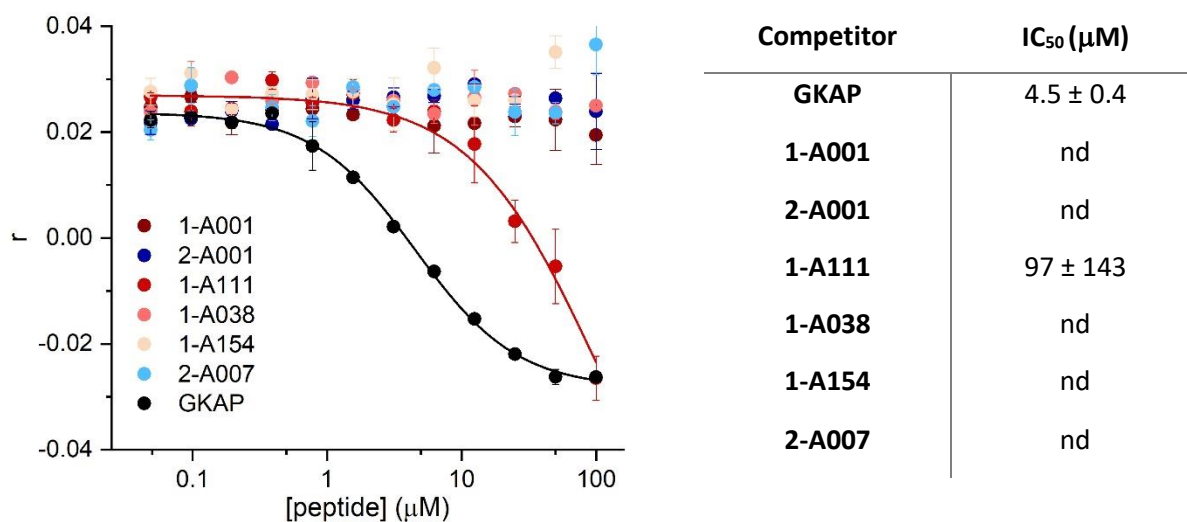

**Figure S7.** Fluorescence anisotropy competition assay and fitted IC<sub>50</sub> values for GKAP PBM (Ac-EAQTRL-COOH) and the hybrid compounds selected for validation from the single point screens. Compounds **1-A001** and **2-A001** were incubated with 5 equivalents of aldehydes in 50 mM NH<sub>4</sub>Ac, pH 6.5 10 mM aniline containing buffer at room temperature in presence of protein for 24 hours, after which 10 nM FITC-Ahx-TRL-COOH was added as tracer. Final SHANK1 PDZ concentration was 1 μM. Error bars represent standard deviation of duplicate samples. Compound **1-A111** resulted in protein precipitation and alteration of fluorescence intensity, therefore this compound was excluded from further screens.



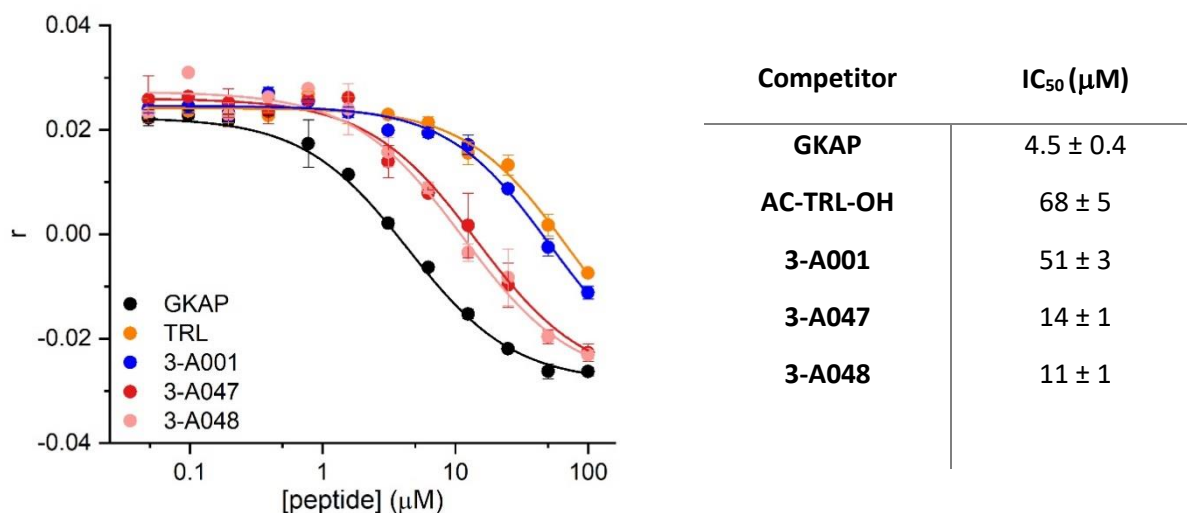

**Figure S8.** Fluorescence anisotropy competition assay and fitted IC<sub>50</sub> values for GKAP PBM (Ac-EAQTRL-COOH) and the hybrid compounds selected for validation from the single point screens. Compound **3-A001** was incubated with 5 equivalents of aldehydes in 50 mM NH<sub>4</sub>Ac, pH 6.5 10 mM aniline containing buffer at room temperature in the presence of protein for 24 hours, after which 10 nM FITC-Ahx-TRL-COOH was added as tracer. The final SHANK1 PDZ concentration was 1 μM. Error bars represent standard deviation of duplicate samples.

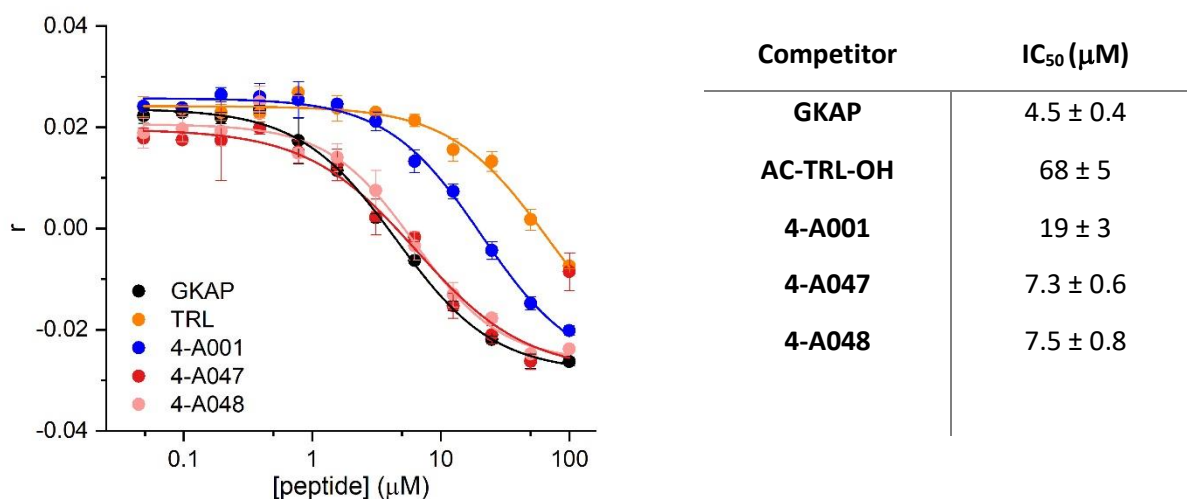

**Figure S9.** Fluorescence anisotropy competition assay and fitted IC<sub>50</sub> values for GKAP PBM (Ac-EAQTRL-COOH) and the hybrid compounds selected for validation from the single point screens. Compound **4-A001** was incubated with 5 equivalents of aldehydes in 50 mM NH<sub>4</sub>Ac, pH 6.5 10 mM aniline containing buffer at room temperature in the presence of protein for 24 hours, after which 10 nM FITC-Ahx-TRL-COOH was added as tracer. The final SHANK1 PDZ concentration was 1 μM. Error bars represent standard deviation of duplicate samples.

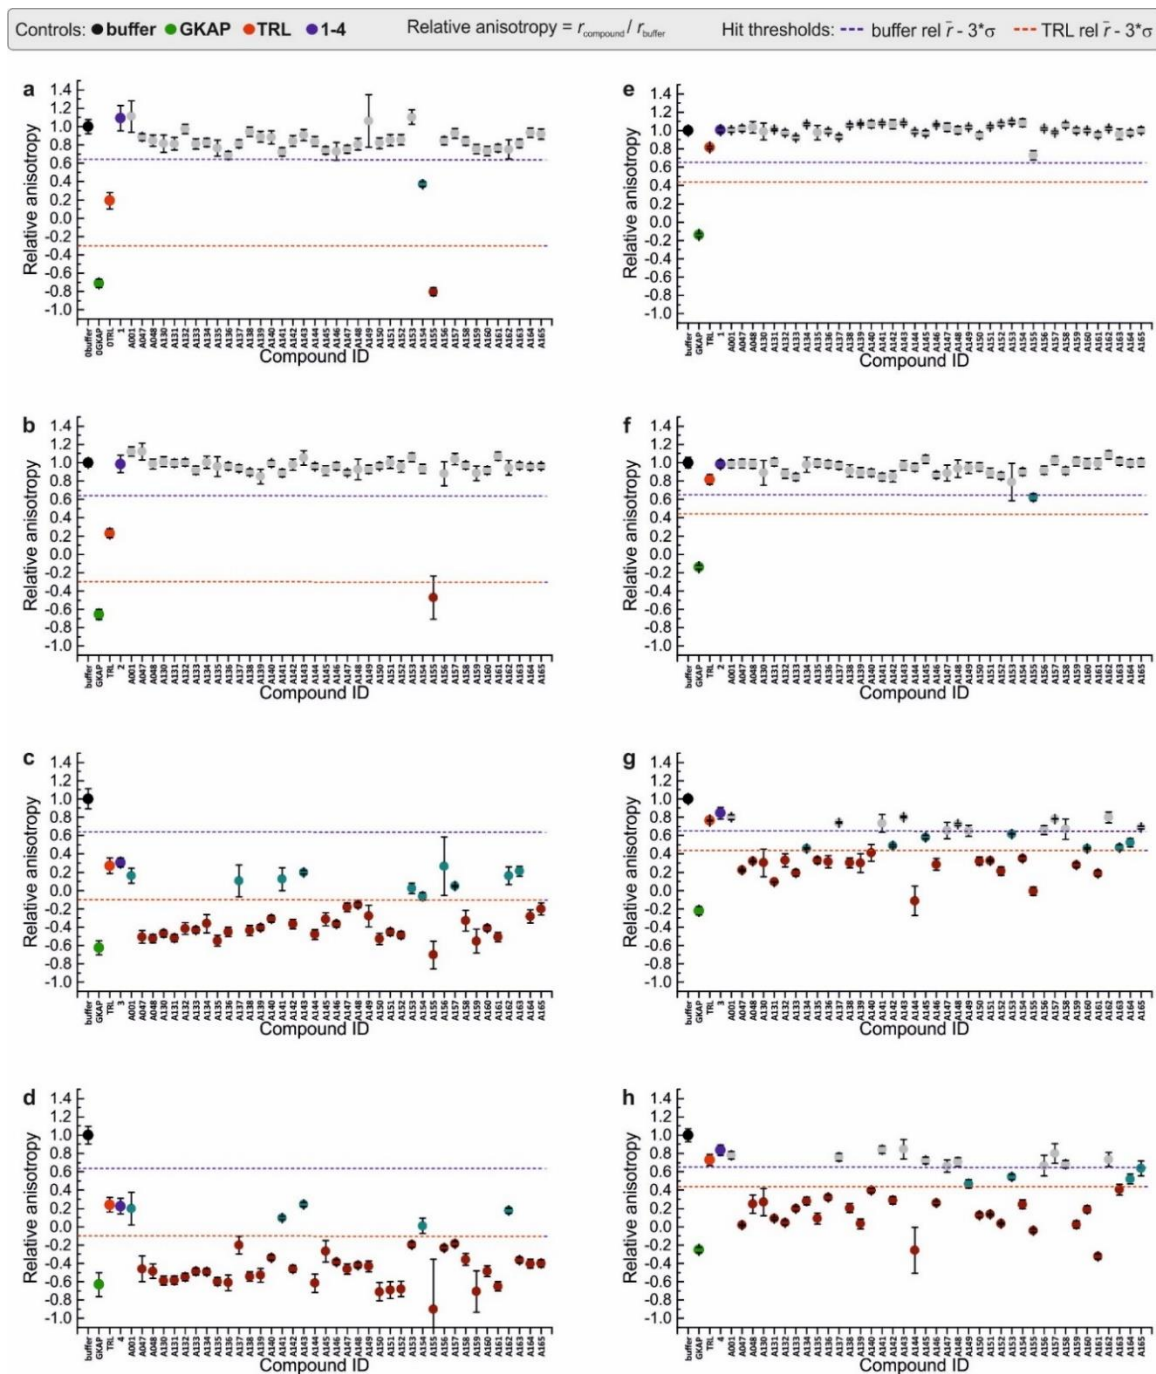

**Figure S10.** Results of the fluorescence anisotropy competition screening at 50  $\mu\text{M}$  for hydrazones formed from a) **1**, b) **2**, c) **3**, d) **4** and at 10  $\mu\text{M}$  concentration for e) **1**, f) **2**, g) **3**, h) **4**. Compounds were individually incubated with 5 equivalents of aldehydes (A130-165) for 24 hours before tracer addition. The assay was performed in 50 mM  $\text{NH}_4\text{Ac}$  buffer, pH 6.5, 10 mM aniline using 1  $\mu\text{M}$  final protein concentration and 10 nM FITC-Ahx-TRL-COOH as tracer at room temperature. All assays included a buffer (black), GKAP PBM (Ac-EAQTRL-COOH) (green) and TRL (red) control. Anisotropy is expressed relative to the buffer control, where no competitor is present. Each dot on the graph represents the relative activity of a hybrid compound formed with different aldehyde fragments. Hit thresholds were defined as i) buffer  $r_{\text{rel}} - 3\sigma$  (blue dashed line) and ii) TRL  $r_{\text{rel}} - 3\sigma$  (red dashed line). Hybrids reaching these thresholds are colored cyan and red respectively. Error bars represent the standard deviation of sample duplicates.

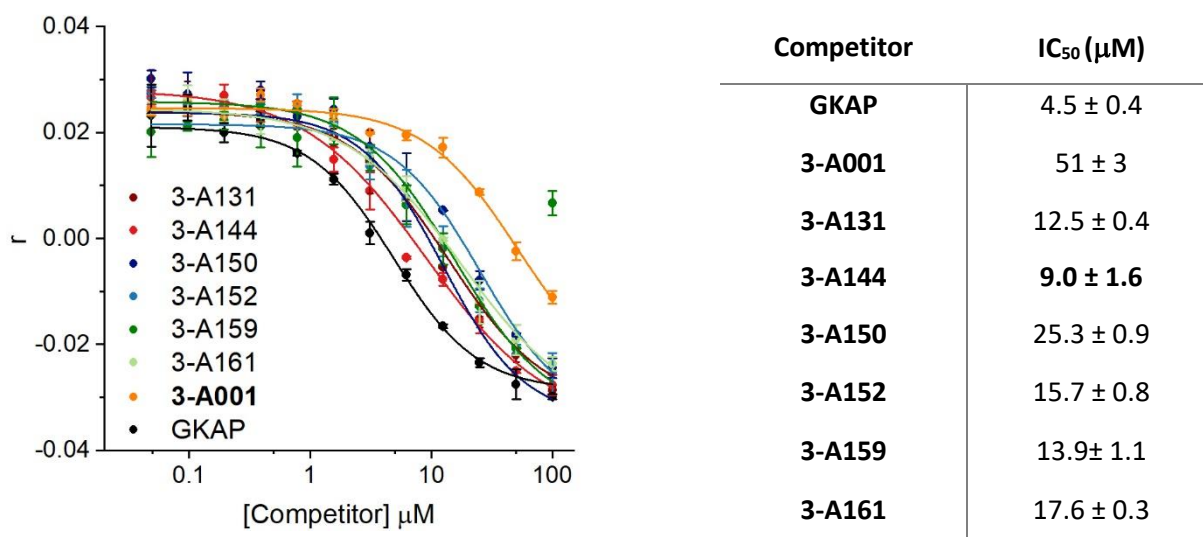

**Figure S11.** Fluorescence anisotropy competition assay and fitted IC<sub>50</sub> values for GKAP PBM (Ac-EAQTRL-COOH) and the hybrid compounds selected for validation from the single point screens. Compound **3-A001** was incubated with 5 equivalents of aldehydes in 50 mM NH<sub>4</sub>Ac, pH 6.5 10 mM aniline containing buffer at room temperature in the presence of protein for 24 hours, after which 10 nM FITC-Ahx-TRL-COOH was added as tracer. The final SHANK1 PDZ concentration was 1 μM. Error bars represent standard deviation of duplicate samples.

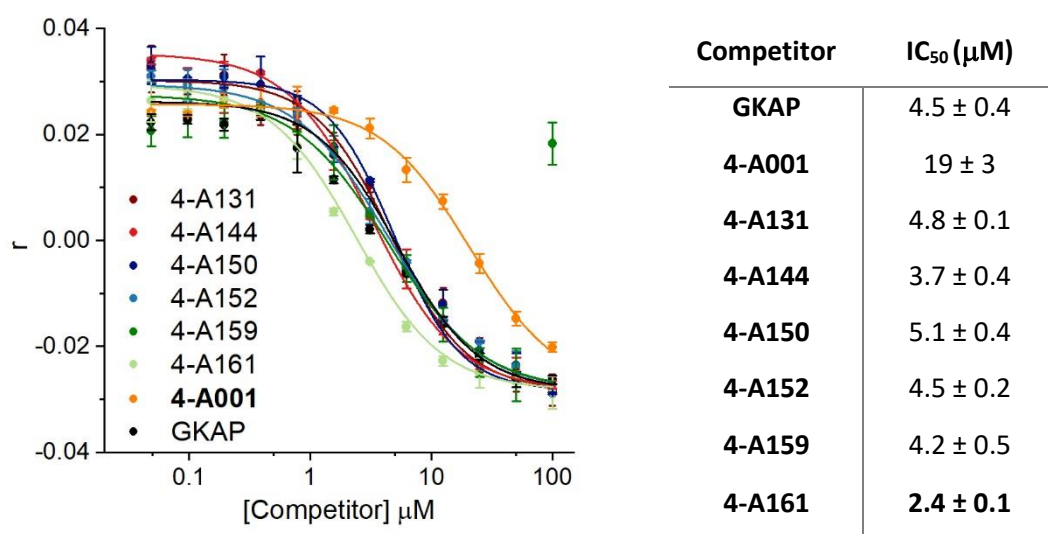

**Figure S12.** Fluorescence anisotropy competition assay and fitted IC<sub>50</sub> values for GKAP PBM (Ac-EAQTRL-COOH) and the hybrid compounds selected for validation from the single point screens. Compound **4-A001** was incubated with 5 equivalents of aldehydes in 50 mM NH<sub>4</sub>Ac, pH 6.5 10 mM aniline containing buffer at room temperature in the presence of protein for 24 hours, after which 10 nM FITC-Ahx-TRL-COOH was added as tracer. The final SHANK1 PDZ concentration was 1 μM. Error bars represent standard deviation of duplicate samples.

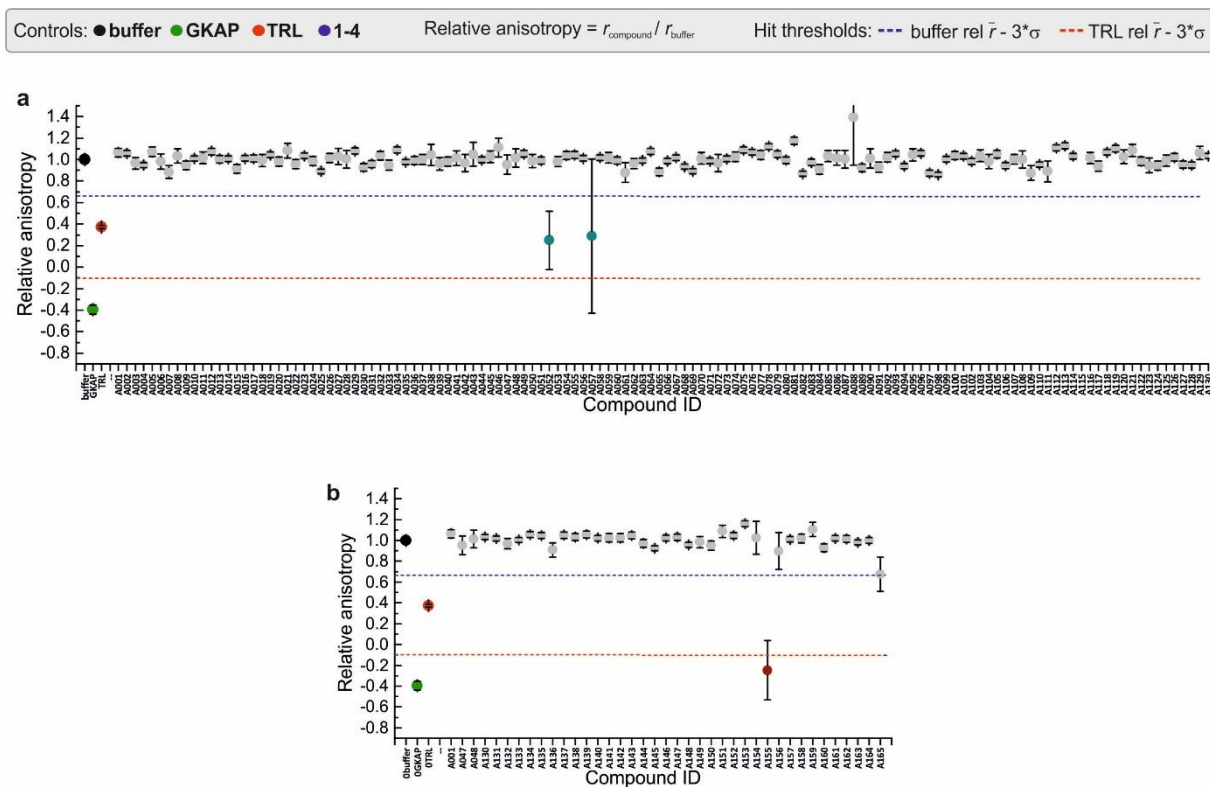

**Figure S13.** Results of the fluorescence anisotropy competition screening of the aldehyde fragments at 250  $\mu\text{M}$  concentration. Aldehydes (A001-A165) were incubated for 24 hours in the presence of SHANK1 PDZ for 24 hours before tracer addition. Assay was performed in 50 mM  $\text{NH}_4\text{Ac}$  buffer, pH 6.5, 10 mM aniline using 1  $\mu\text{M}$  final protein concentration and 10 nM FITC-Ahx-TRL-COOH as tracer at room temperature. All assays included a buffer (black), GKAP PBM (Ac-EAQTRL-COOH) (green) and TRL (red) control. Anisotropy is expressed relative to the buffer control, where no competitor is present. Each dot on the graph represents the relative activity of a an aldehyde fragment. Hit thresholds were defined as i) buffer  $r_{\text{rel}} - 3\sigma$  (blue dashed line) and ii) TRL  $r_{\text{rel}} - 3\sigma$  (red dashed line). Fragments reaching these thresholds are colored cyan and red respectively. Error bars represent the standard deviation of sample duplicates. A155 excluded from further screens due to its interference with fluorescence intensity.



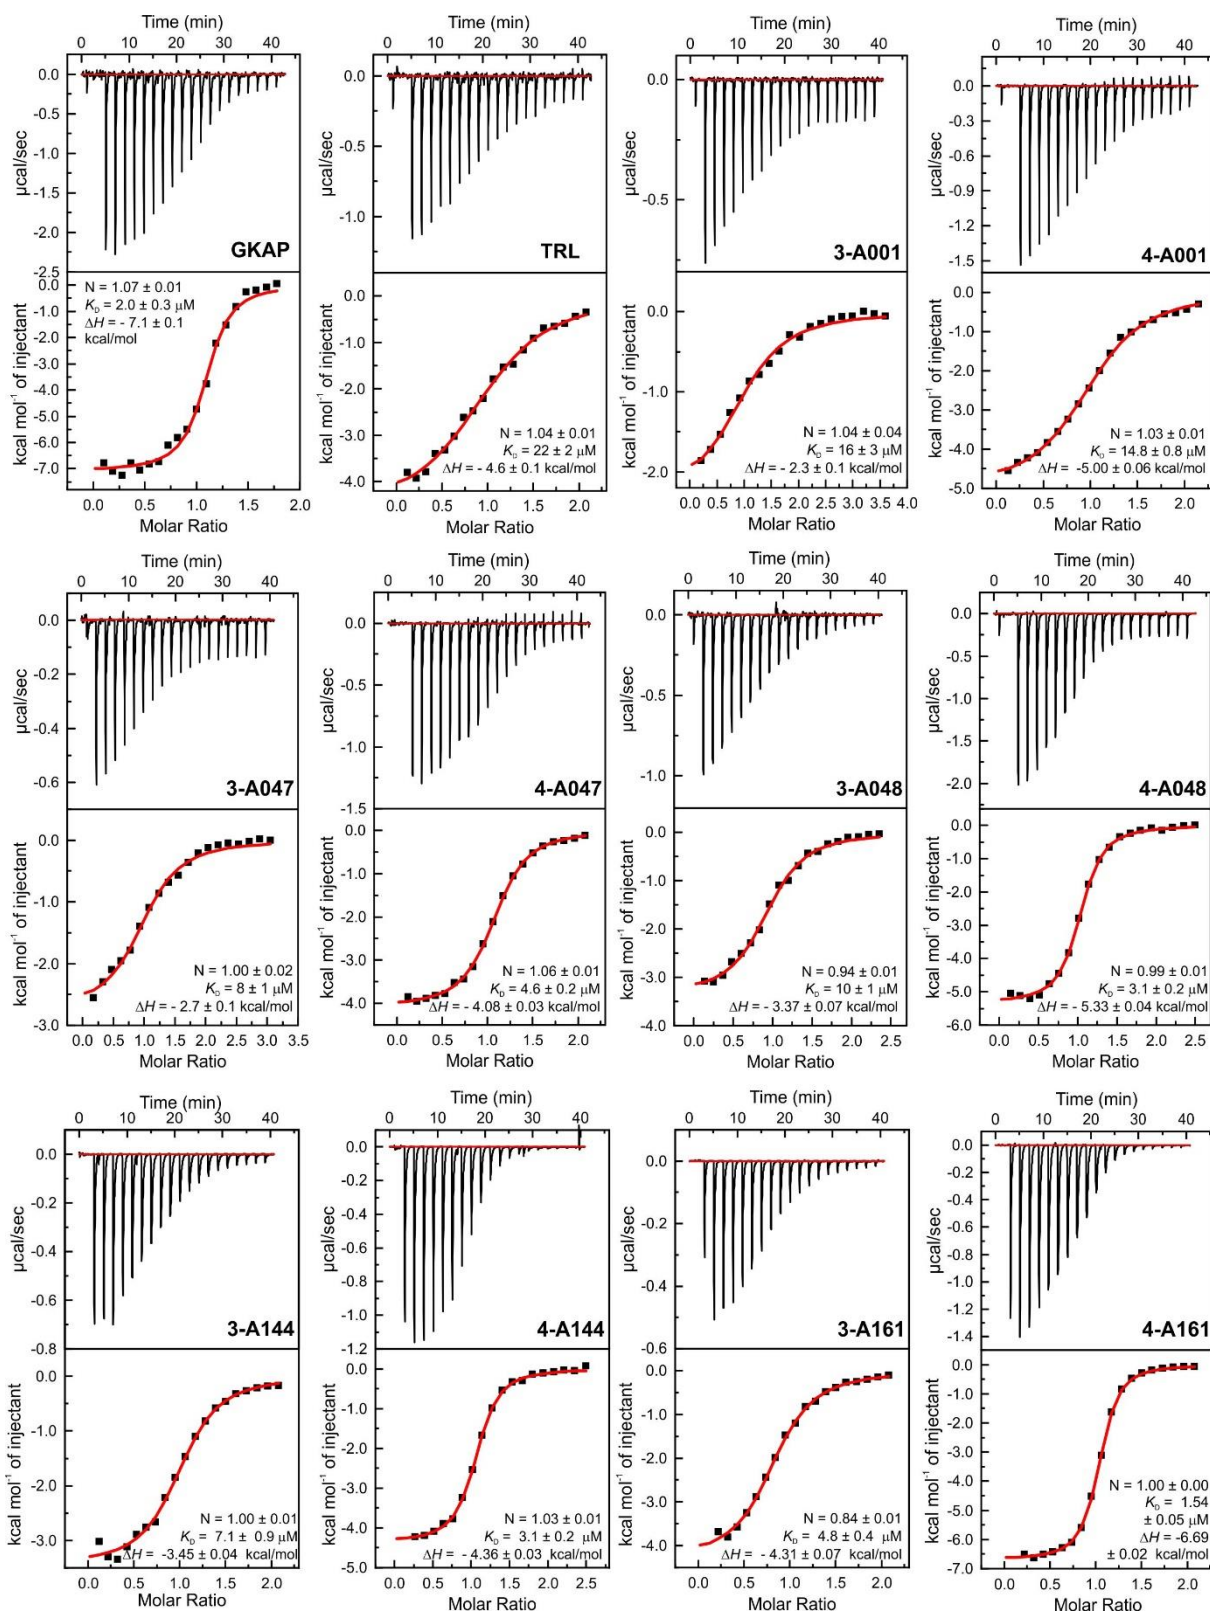

**Figure S14.** Raw ITC data (top) and fitted thermograms (bottom) for the tested hydrazone hits and controls. ITCs were measured in 25 mM Tris, pH 7.5 buffer containing 150 mM NaCl at 25 °C by injecting 0.75-1 mM peptide or hydrazone solution to 75-150 µM protein.

**Table S2.** Calculated group efficiency values (GE) for GKAP and the hydrazides relative to the core Ac-TRL-OH motif. (N<sub>nH</sub> = number of non-hydrogen atoms). The absolute configuration and enantiomeric purity of fragment A161 is unknown.

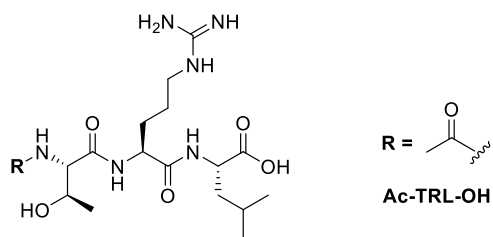

| Compound | R | $\Delta\Delta G$ (kJ/mol)<br>( $\Delta G_{\text{Compound}} - \Delta G_{\text{Ac-TRL-OH}}$ ) | $\Delta N_{\text{nH}}$<br>( $N_{\text{nH,Compound}} - N_{\text{nH,Ac-TRL-OH}}$ ) | GE<br>( $-\Delta\Delta G / \Delta N_{\text{nH}}$ ) |
|----------|---|---------------------------------------------------------------------------------------------|----------------------------------------------------------------------------------|----------------------------------------------------|
| GKAP     |   | -6.03                                                                                       | 23                                                                               | 0.26                                               |
| 3-A001   |   | -0.84                                                                                       | 12                                                                               | 0.07                                               |
| 4-A001   |   | -1.08                                                                                       | 13                                                                               | 0.08                                               |
| 3-A047   |   | -2.65                                                                                       | 15                                                                               | 0.18                                               |
| 4-A047   |   | -2.05                                                                                       | 16                                                                               | 0.13                                               |
| 3-A048   |   | -3.98                                                                                       | 15                                                                               | 0.27                                               |
| 4-A048   |   | -4.98                                                                                       | 16                                                                               | 0.31                                               |
| 3-A144   |   | -2.89                                                                                       | 16                                                                               | 0.18                                               |
| 4-A144   |   | -3.87                                                                                       | 17                                                                               | 0.23                                               |
| 3-A161   |   | -4.94                                                                                       | 23                                                                               | 0.21                                               |
| 4-A161   |   | -6.69                                                                                       | 24                                                                               | 0.28                                               |

**Table S3.** Calculated group efficiency values (GE) for hydrazides with the core compound **3-A001**. Added groups compared to the core compound highlighted red. The absolute configuration and enantiomeric purity of fragment A161 is unknown.

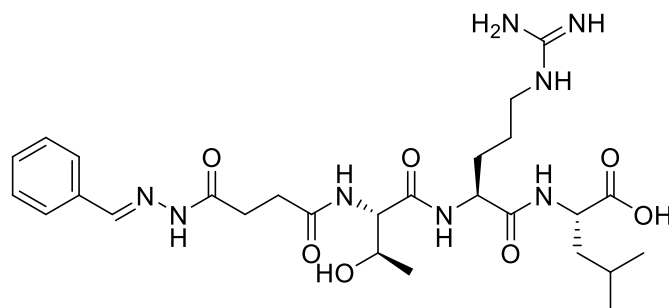

**3-A001**

| Compound | Added substituent (in red) | $\Delta\Delta G$ (kJ/mol)<br>( $\Delta G_{\text{Compound}} - \Delta G_{3\text{-A001}}$ ) | $\Delta N_{\text{NH}}$<br>( $N_{\text{NH,Compound}} - N_{\text{NH, 3-A001}}$ ) | GE<br>( $-\Delta\Delta G / \Delta N_{\text{NH}}$ ) |
|----------|----------------------------|------------------------------------------------------------------------------------------|--------------------------------------------------------------------------------|----------------------------------------------------|
| 3-A047   |                            | -1.81                                                                                    | 3                                                                              | 0.60                                               |
| 3-A048   |                            | -3.14                                                                                    | 3                                                                              | 1.05                                               |
| 3-A144   |                            | -2.05                                                                                    | 4                                                                              | 0.51                                               |
| 3-A161   |                            | -4.10                                                                                    | 11                                                                             | 0.37                                               |

**Table S4.** Calculated group efficiency values (GE) for hydrazides with the core compound **4-A001**. Added groups compared to the core compound highlighted red. The absolute configuration and enantiomeric purity of fragment A161 is unknown.

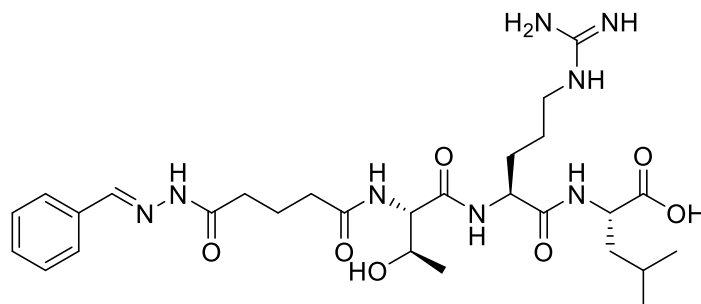

**4-A001**

| Compound | Added substituent (in red) | $\Delta\Delta G$ (kJ/mol)<br>( $\Delta G_{\text{Compound}} - \Delta G_{4\text{-A001}}$ ) | $\Delta N_{\text{NH}}$<br>( $N_{\text{NH,Compound}} - N_{\text{NH,4-A001}}$ ) | GE<br>( $-\Delta\Delta G / \Delta N_{\text{NH}}$ ) |
|----------|----------------------------|------------------------------------------------------------------------------------------|-------------------------------------------------------------------------------|----------------------------------------------------|
| 4-A047   |                            | -0.97                                                                                    | 3                                                                             | 0.32                                               |
| 4-A048   |                            | -3.90                                                                                    | 3                                                                             | 1.30                                               |
| 4-A144   |                            | -2.79                                                                                    | 4                                                                             | 0.70                                               |
| 4-A161   |                            | -5.61                                                                                    | 11                                                                            | 0.51                                               |



**Table S5.** Statistics for obtained crystal structures.

|                                                  | Ligand                                                |                                                                                    |                                                       |                                                       |
|--------------------------------------------------|-------------------------------------------------------|------------------------------------------------------------------------------------|-------------------------------------------------------|-------------------------------------------------------|
|                                                  | 3-A047                                                | 4-A047                                                                             | 3-A048                                                | 4-A048                                                |
| <b>Reservoir conditions</b>                      | 0.1 M HEPES pH 7<br>35% PEG 400                       | 0.1 M HEPES 7.75<br>40% PEG 400<br>30% w/v<br>Trimethylamine N-<br>oxide dihydrate | 0.1 M HEPES pH 7<br>35% PEG 400                       | 0.2 M HEPES 7.75<br>40% PEG 400                       |
| <b>Data Collection</b>                           |                                                       |                                                                                    |                                                       |                                                       |
| X-ray source                                     | DLS Beamline i03                                      | DLS Beamline i04-1                                                                 | DLS Beamline i03                                      | DLS Beamline i03                                      |
| Processed using                                  | xia2 (DIALS,<br>Aimless)                              | Autoproc +<br>Staraniso                                                            | xia2 (DIALS,<br>Aimless)                              | xia2 (DIALS,<br>Aimless)                              |
| oscillations                                     | 0.25                                                  | 0.15                                                                               | 0.25                                                  | 0.2                                                   |
| images collected                                 | 800                                                   | 2400                                                                               | 800                                                   | 1000                                                  |
| Space group                                      | <i>P</i> 2 <sub>1</sub> 2 <sub>1</sub> 2 <sub>1</sub> | <i>P</i> 2 <sub>1</sub> 2 <sub>1</sub> 2 <sub>1</sub>                              | <i>P</i> 2 <sub>1</sub> 2 <sub>1</sub> 2 <sub>1</sub> | <i>P</i> 2 <sub>1</sub> 2 <sub>1</sub> 2 <sub>1</sub> |
| <b>Unit cell dimensions</b>                      |                                                       |                                                                                    |                                                       |                                                       |
| $\alpha, b, c, (\text{\AA})$                     | 44.57,<br>65.97,86.90                                 | 44.67 65.91 85.64                                                                  | 44.30, 64.95,<br>88.28                                | 45.43, 65.64, 86.35                                   |
| $\alpha, \beta, \gamma (\text{\textcircled{)}})$ | 90.0, 90.0, 90.0                                      | 90.0, 90.0, 90.0                                                                   | 90.0, 90.0, 90.0                                      | 90.0, 90.0, 90.0                                      |
| Resolution                                       | 2.12 - 65.97<br>(2.12-2.16)                           | 1.8- 52.23<br>(1.8 - 1.86)                                                         | 1.57 - 88.28<br>(1.57 - 1.60)                         | 1.62- 65.64<br>(1.62 - 1.65)                          |
| Observations                                     | 103336 (4553)                                         | 284711 (11510)                                                                     | 250100 (11477)                                        | 223892 (8301)                                         |
| Unique reflections                               | 15149 (734)                                           | 23236 (1163)                                                                       | 36380 (1782)                                          | 33616 (1510)                                          |
| R <sub>merge</sub> (I)                           | 0.107 (1.355)                                         | 0.050 (1.838)                                                                      | 0.039 (1.291)                                         | 0.079 (1.120)                                         |
| R <sub>meas</sub> (I)                            | 0.116 (1.479)                                         | 0.053 (1.939)                                                                      | 0.042 (1.406)                                         | 0.086 (1.240)                                         |
| R <sub>pim</sub> (I)                             |                                                       | 0.015 (0.612)                                                                      | 0.016 (0.550)                                         | 0.033 (0.522)                                         |
| CC 1/2                                           | 0.996 (0.640)                                         | 1.000 (0.706)                                                                      | 0.999 (0.777)                                         | 0.998 (0.863)                                         |
| I/ $\sigma$                                      | 7.4 (1.2)                                             | 19.1 (1.2)                                                                         | 15.1 (1.1)                                            | 8.1 (1.0)                                             |
| Completeness                                     | 100.0 (100.0)                                         | 92.16 (71.14)                                                                      | 100.0 (99.6)                                          | 99.7 (90.8)                                           |
| Redundancy                                       | 6.8 (6.2)                                             | 12.3 (9.9)                                                                         | 6.9 (6.4)                                             | 6.7 (5.5)                                             |
| <b>Refinement</b>                                |                                                       |                                                                                    |                                                       |                                                       |
| Protein molecules in<br>au                       | 2                                                     | 2                                                                                  | 2                                                     | 2                                                     |
| R <sub>work</sub> /R <sub>free</sub> (%)         | 21.43/24.61                                           | 22.24/25.59                                                                        | 20.53/23.11                                           | 20.97/24.71                                           |
| No atoms                                         | 1795                                                  | 1819                                                                               | 1926                                                  | 1989                                                  |
| Protein                                          | 1622                                                  | 1614                                                                               | 1657                                                  | 1654                                                  |
| Ligand                                           | 97                                                    | 92                                                                                 | 90                                                    | 92                                                    |
| Water                                            | 76                                                    | 113                                                                                | 179                                                   | 240                                                   |
| <b>Mean B factors (<math>\text{\AA}</math>)</b>  | 54.8                                                  | 45.0                                                                               | 43.7                                                  | 36.7                                                  |
| Protein                                          | 54.1                                                  | 43.3                                                                               | 42.5                                                  | 35.2                                                  |
| Ligand                                           | 68.5                                                  | 77.0                                                                               | 66.3                                                  | 60.8                                                  |
| Water                                            | 53.5                                                  | 43.4                                                                               | 50.0                                                  | 44.0                                                  |
| <b>R.m.s. deviations</b>                         |                                                       |                                                                                    |                                                       |                                                       |
| Bond length ( $\text{\AA}$ )                     | 0.008                                                 | 0.008                                                                              | 0.006                                                 | 0.006                                                 |
| Bond angles                                      | 0.87                                                  | 0.86                                                                               | 0.72                                                  | 0.68                                                  |
| <b>Ramachandran statistics</b>                   |                                                       |                                                                                    |                                                       |                                                       |
| % favoured                                       | 98.5                                                  | 99.0                                                                               | 99.5                                                  | 100.00                                                |
| % allowed                                        | 1.5                                                   | 1.0                                                                                | 0.5                                                   | 0                                                     |
| % outliers                                       | 0                                                     | 0                                                                                  | 0                                                     | 0                                                     |
| Clashscore                                       | 3.25                                                  | 5.66                                                                               | 2.00                                                  | 3.15                                                  |

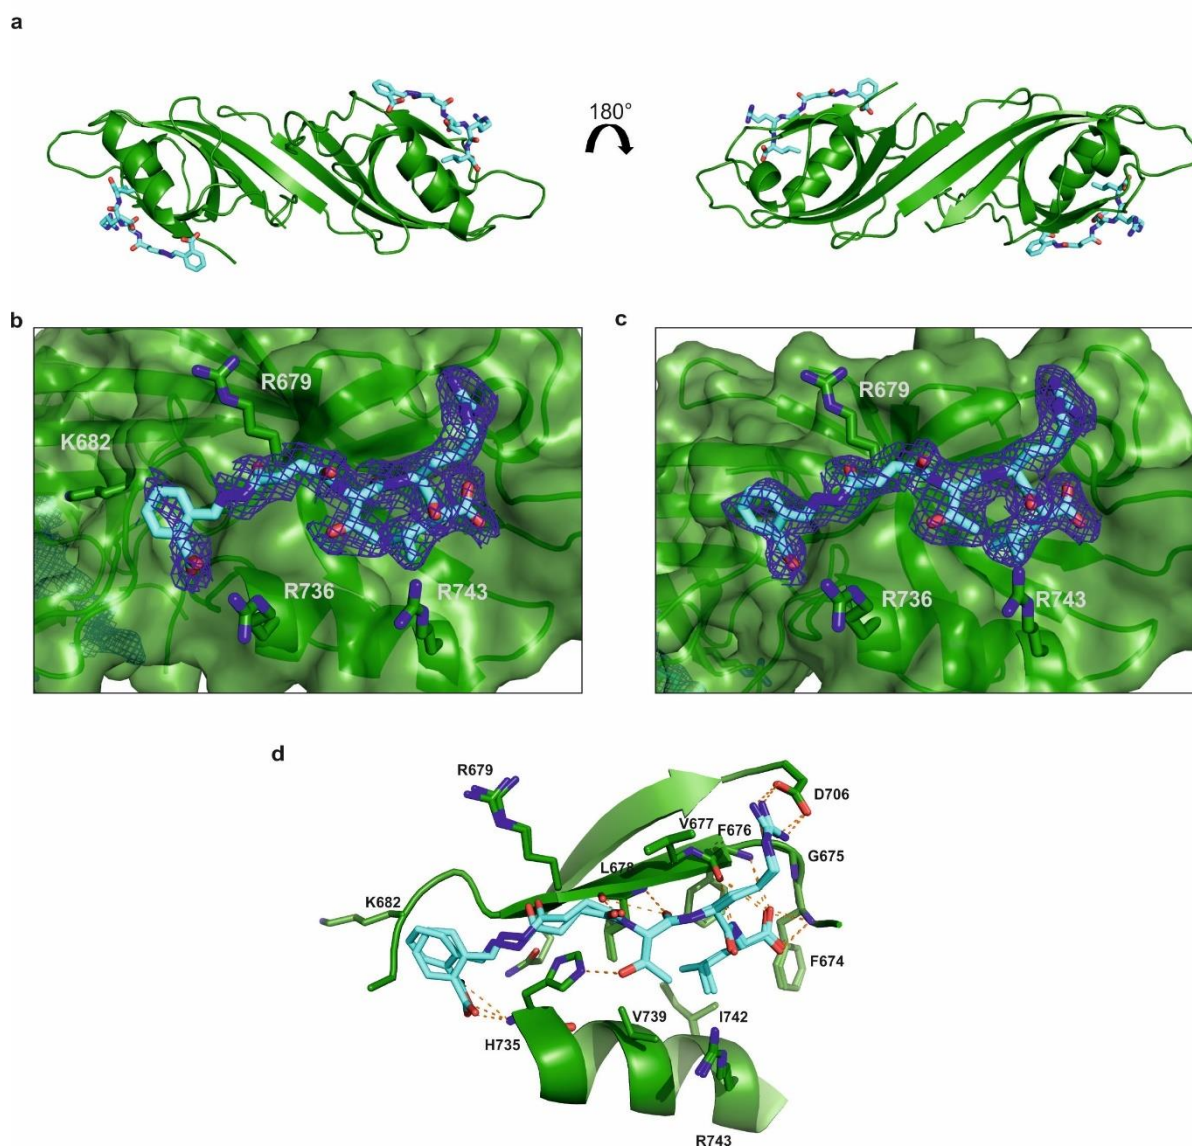

**Figure S15.** a) Co-crystal structure of SHANK1 PDZ (green) with compound **3-A047** (cyan) (PDB: 6YWZ) b-c) Ligand binding sites showing electron density map around the ligand at rmsd level of 0.5 (dark blue); adjacent positively charged side chains are labelled. d) Overlay of the two binding sites showing the two different ligand conformations. Polar contacts are indicated by orange dashed lines.

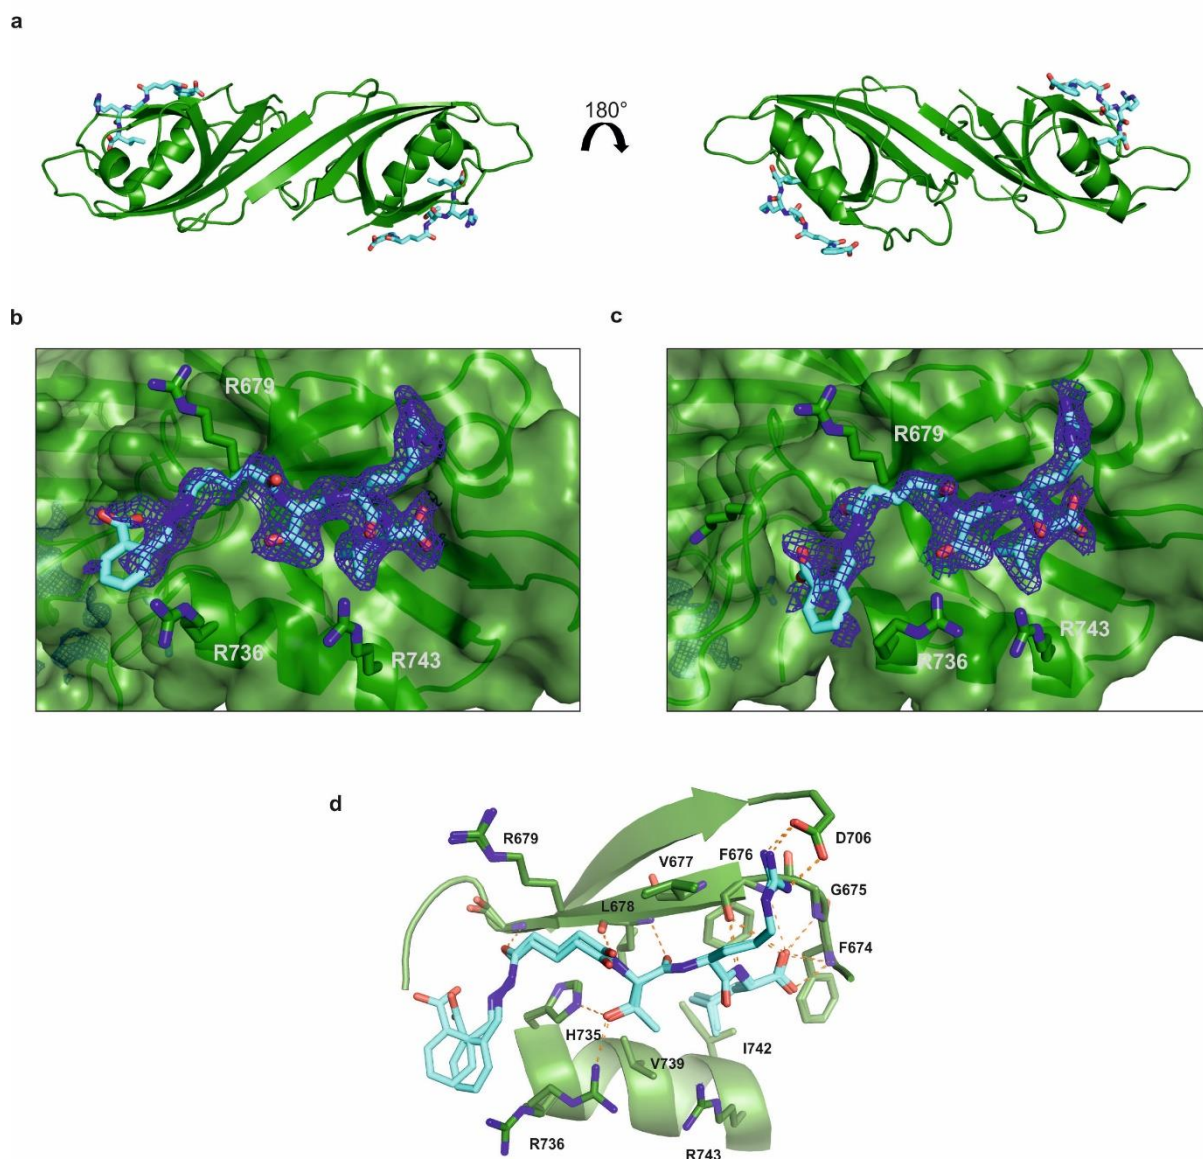

**Figure S16.** a) Co-crystal structure of SHANK1 PDZ (green) with compound **4-A047** (cyan) (PDB: 6YX1) b-c) Ligand binding sites showing electron density map around the ligand at rmsd level of 0.5 (dark blue), adjacent positively charged side chains are labelled. d) Overlay of the two binding sites showing the two different ligand conformations. Polar contacts indicated by orange dashed lines.



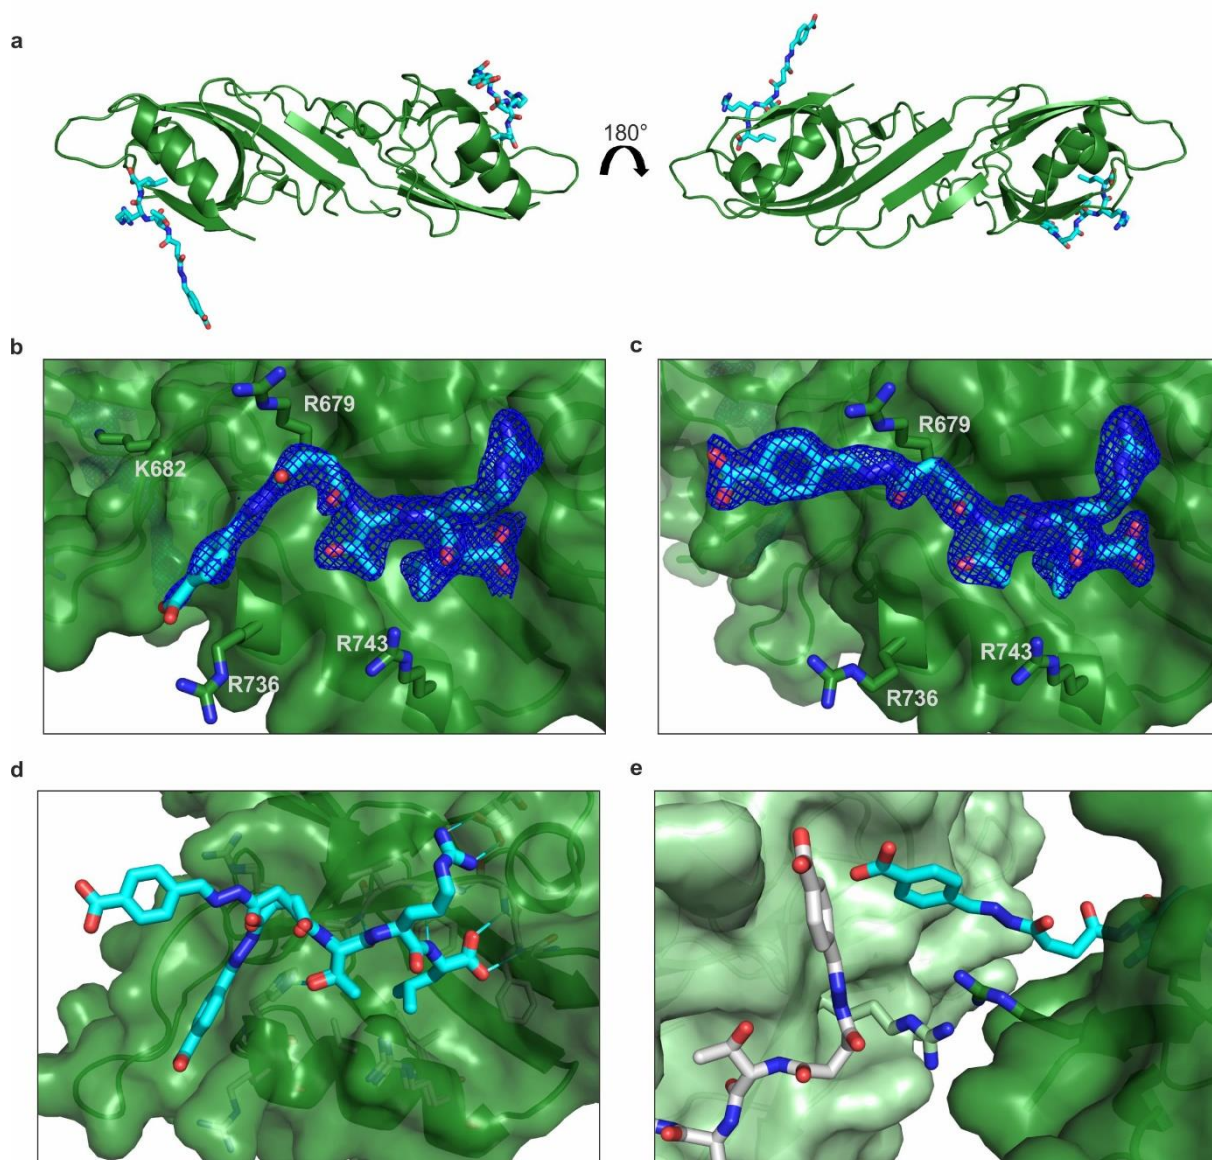

**Figure S17.** a) Co-crystal structure of SHANK1 PDZ (green) with compound **3-A048** (cyan) (PDB: 6YX0) b-c) Ligand binding sites showing electron density map around the ligand at rmsd level of 1.0 (dark blue), adjacent positively charged side chains are labelled. d) Overlay of the two binding sites showing the two different ligand conformations. e) Interface between symmetry related binding sites, showing that the conformation of the ligand is influenced by crystal packing.

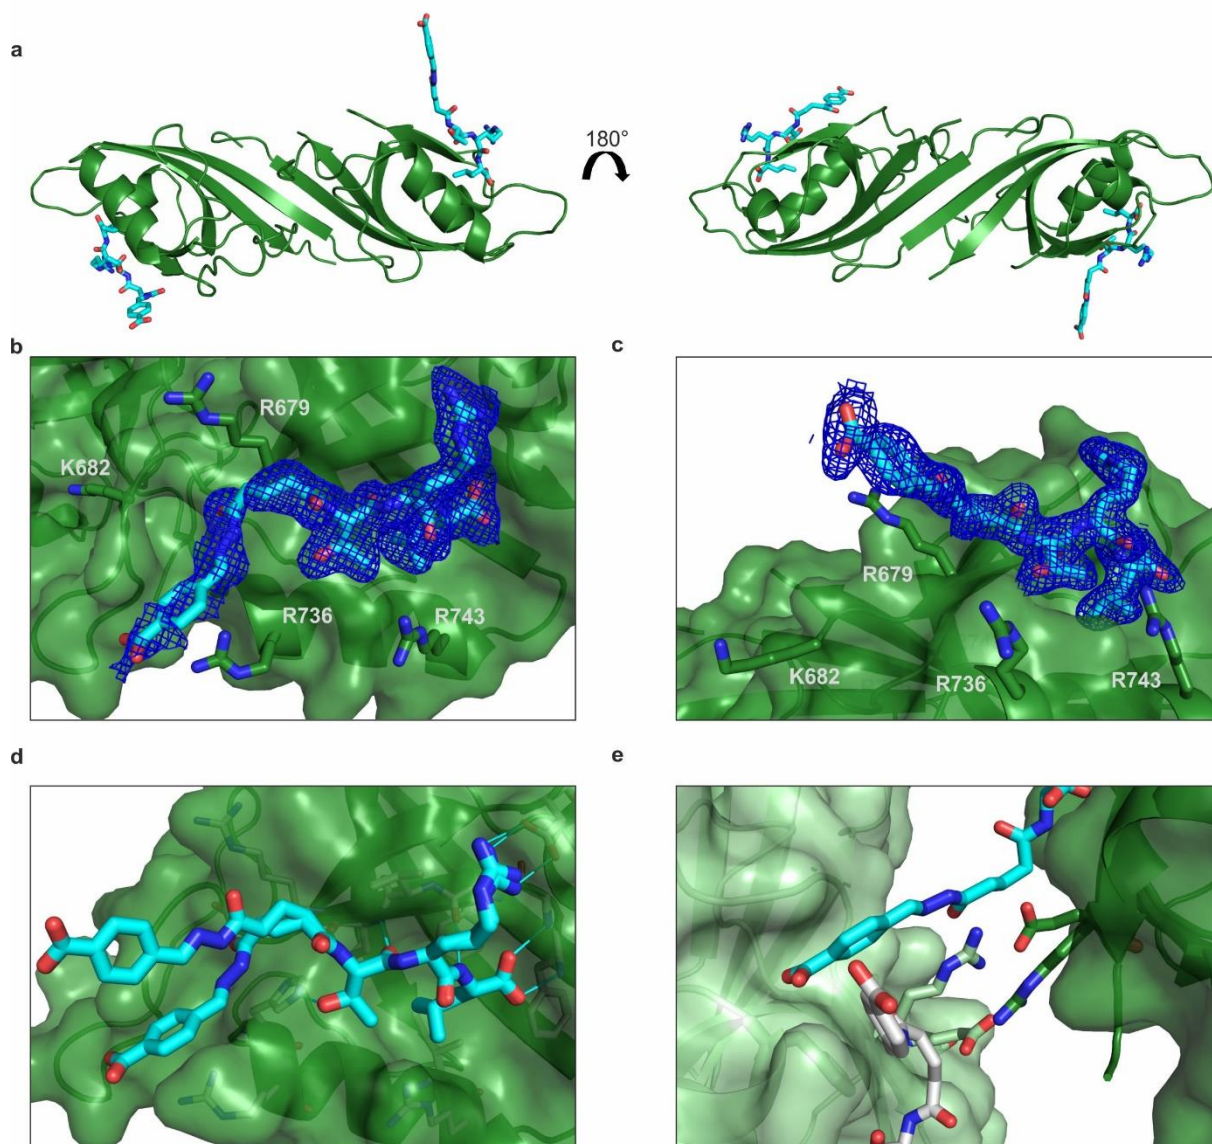

**Figure S18.** a) Co-crystal structure of SHANK1 PDZ (green) with compound **4-A048** (cyan) (PDB: 6YX2) b-c) Ligand binding sites showing electron density map around the ligand at rmsd level of 0.5 (dark blue), adjacent positively charged side chains are labelled. d) Overlay of the two binding sites showing the two different ligand conformations. e) Interface between symmetry related binding sites, showing that the conformation of the ligand is influenced by crystal packing.



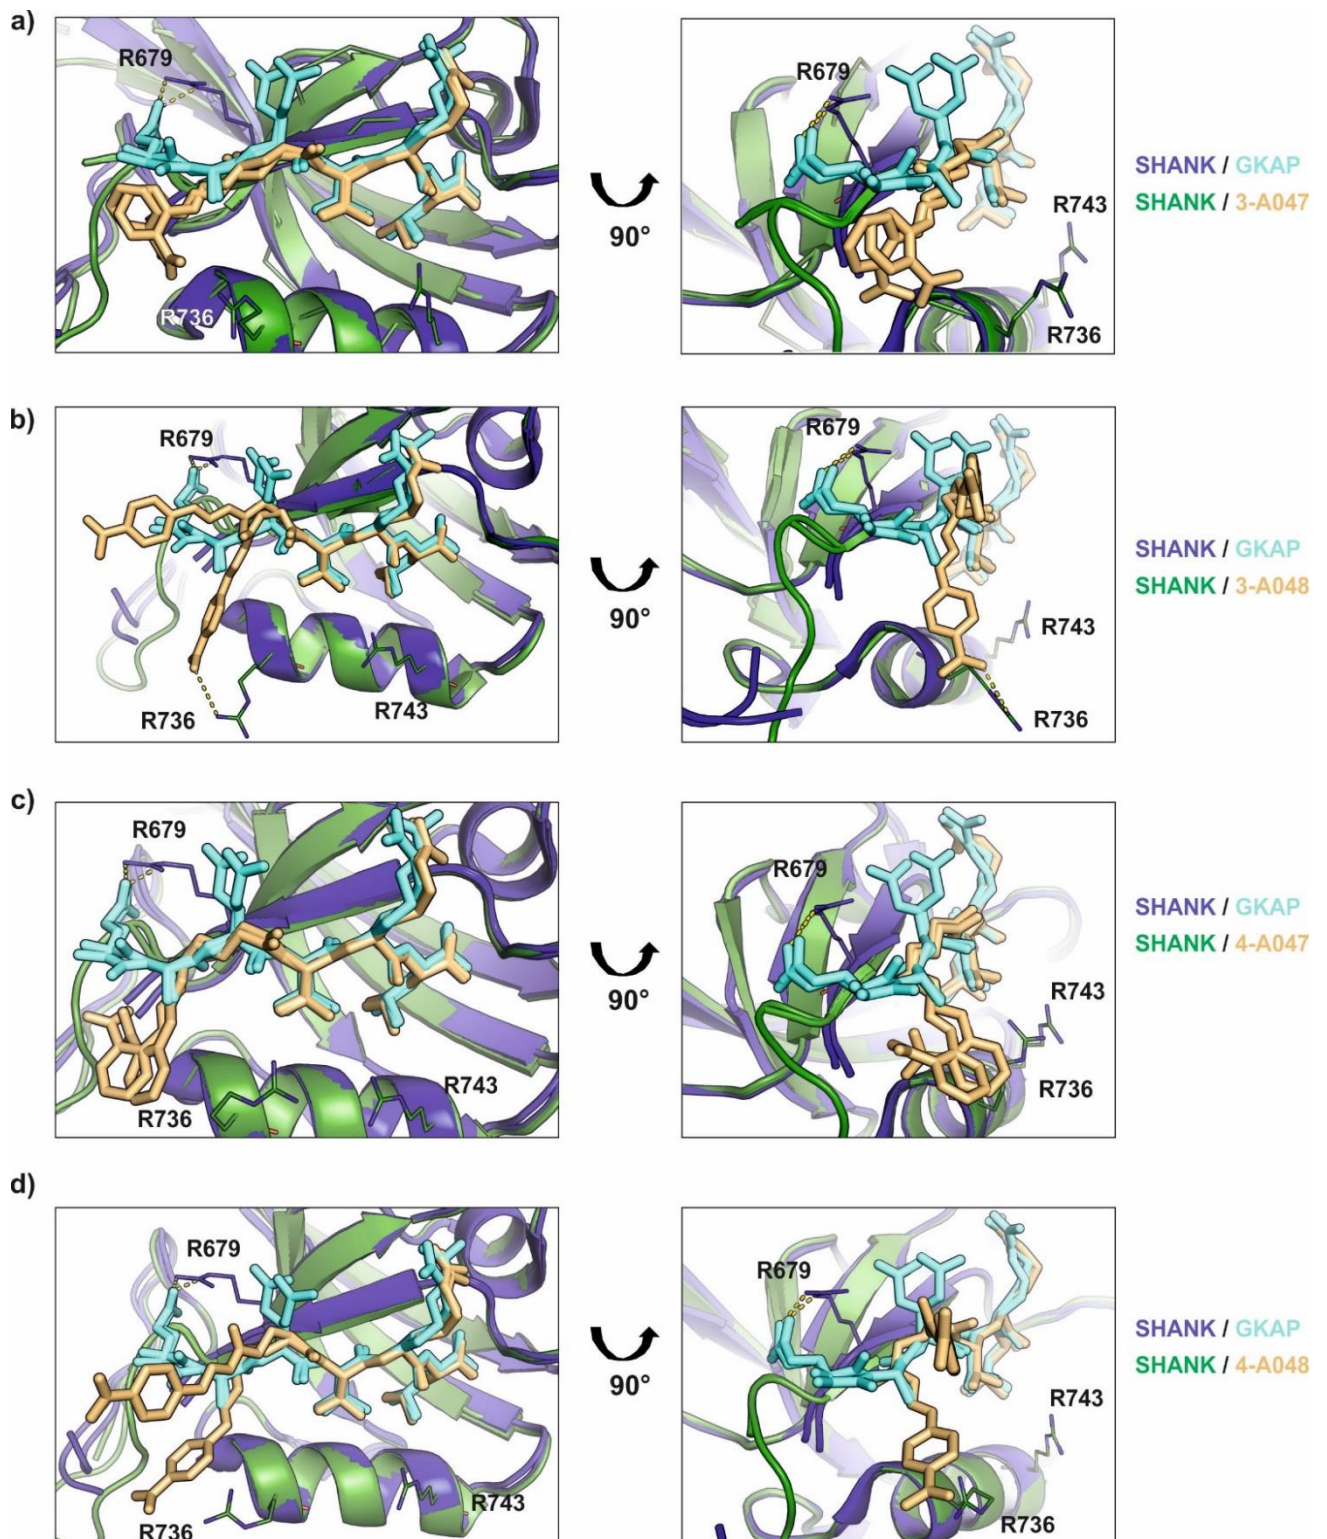

**Figure S19.** Overlays of co-crystal structures of GKAP (cyan) in complex with SHANK1 PDZ (blue, PDB:1Q3P) with a) 3-A047; b) 3-A048; c) 4-A047 and d) 4-A048 (orange) in complex with SHANK1 PDZ (forest green), chains A and B are superimposed in all crystal structures. Yellow dashed lines indicate polar contacts. Only relevant Arg side-chains are shown in the figure. The N-terminal glutamate residue of GKAP interacts with R679, in contrast, the carboxylic acid moiety of the bound hybrids exhibits a preference for interaction with the opposite binding site, making an interaction with R736 of SHANK PDZ.

**Table S6.** RMSD values of crystal structures after alignment with ShankPDZ/GKAP complex (1Q3P). Alignment was performed pairwise to full protein chains (chain A and B separately) and TRL-OH residues of the ligands.

| <i>Compound</i> | <i>PDB</i> | <i>RMSD</i>               |         | <i>RMSD</i>            |         |
|-----------------|------------|---------------------------|---------|------------------------|---------|
|                 |            | <i>Full protein-chain</i> |         | <i>TRL-OH residues</i> |         |
|                 |            | Chain A                   | Chain B | Chain A                | Chain B |
| <b>3-A047</b>   | 6YWZ       | 0.411                     | 0.452   | 0.316                  | 0.231   |
| <b>3-A048</b>   | 6YX0       | 0.353                     | 0.469   | 0.211                  | 0.183   |
| <b>4-A047</b>   | 6YX1       | 0.416                     | 0.519   | 0.251                  | 0.287   |
| <b>4-A048</b>   | 6YX2       | 0.353                     | 0.484   | 0.146                  | 0.199   |

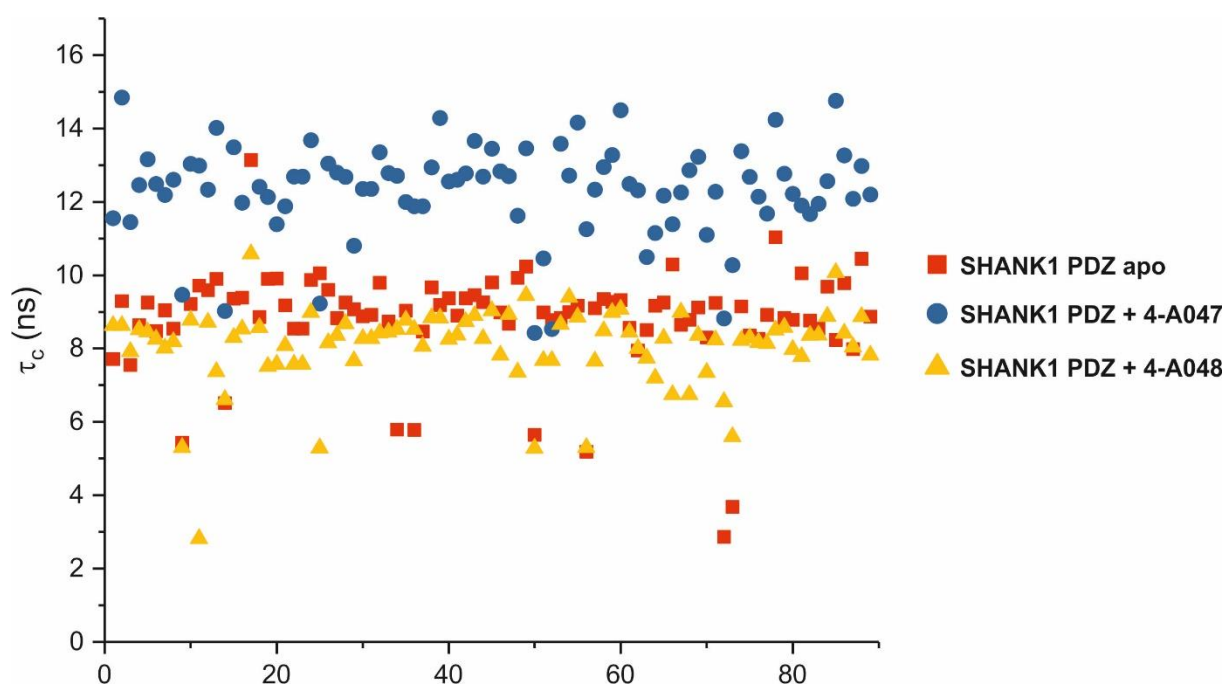

**Figure S20.** Fitted rotational correlation time of the SHANK1 residues with and without ligands at 0.32 mM protein concentration using 1:2 protein:ligand ratio in 5 mM Tris, 100 mM NaCl, pH 7.4. The average  $\tau_c$  of SHANK1 8.8 ns corresponds to approximately 13 kDa, and is similar for SHANK1 in the presence of **4-A048** ( $\tau_c = 8.1$  ns). The  $\tau_c$  of SHANK1 in the presence of **4-A047** is higher, (12.4 ns) which corresponds to a protein of approximately 19 kDa, which is below what would be expected if dimerization were to occur. SHANK1 has been observed to dimerize in the solid state through interactions of protomers via  $\beta$ -strand distal to the ligand binding cleft<sup>2</sup>; we conclude that this is likely a crystallographic artefact or only occurs at higher concentrations than those used for these NMR analyses and differs from the interaction of the ligand with a symmetry related protein observed in this work (Figure S18).



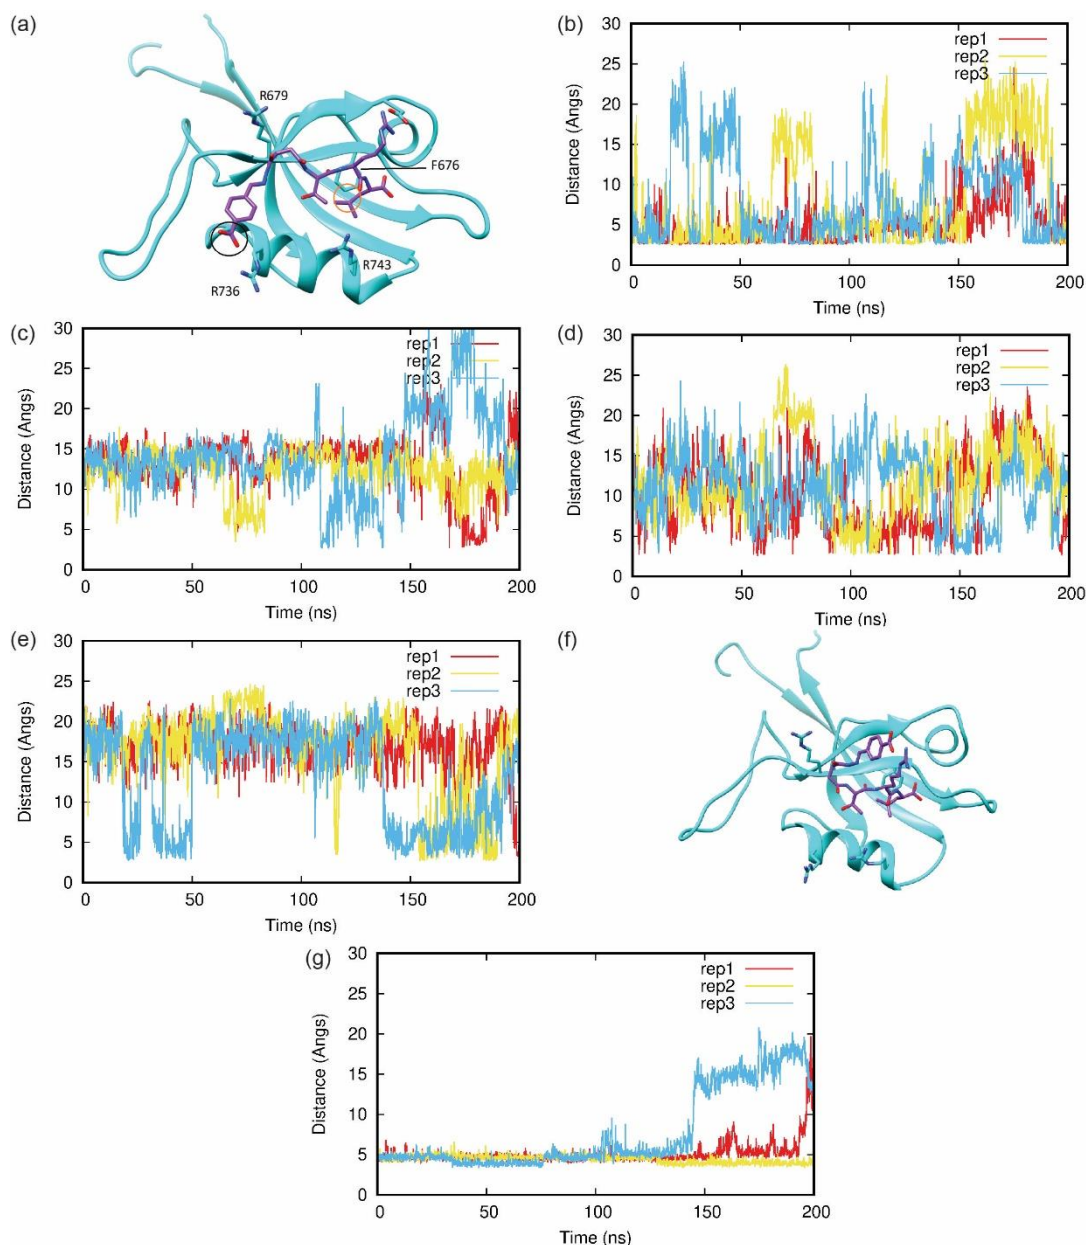

**Figure S21.** Molecular dynamics simulations for the the **3-A048/SHANK1** interaction ( $n = 3$ ), illustrating distances between the aromatic carboxylate of **3-A048** and arginine residues on SHANK1 or the ligand (see also Moive S1); these data provide a further rationale for the disorder in this region observed in the x-ray structures; (a) Binding pose at the start of the simulations showing the positions of: the arginine sidechains in the distance calculations between the aromatic carboxylate (circled black) of **3-A048**; F676 of SHANK1-PDZ and the methyl C2 of Val in **3-A048** (circled orange); (b) Distance from R736 to aromatic carboxylate of **3-A048** (c) Distance from R679 to aromatic carboxylate of **3-A048** (d) Distance from R743 to aromatic carboxylate of **3-A048** (e) intramolecular distance from aromatic carboxylate of **3-A048** to arginine of **3-A048** (f) diagram illustrating intramolecular interaction between aromatic carboxylate of **3-A048** to arginine of **3-A048** (g) distance between F676 of SHANK1-PDZ and the methyl C2 of Val in **3-A048**. Collectively the simulations indicate that interaction between R736 and the aromatic carboxylate of **3-A048** is generally stable, that the side-chains of R679 and R743 seem to reciprocate for attracting the carboxylate and that when the carboxylate folds over it can interact with its own guanidinium group on the ligand, pushing out R679.

PSD 95 PDZ1 amino acid sequence

|            |            |            |           |      |            |            |
|------------|------------|------------|-----------|------|------------|------------|
|            | 10         | 20         | 30        | 40   | 50         | 60         |
| GAMEMEYEEI | TLERGN     | SGLG       | FSIAGG    | TDNP | HIGDDPSIFI | TKIIPGGAAA |
|            | 70         | 80         | 90        |      |            |            |
| ILFVNEVDVR | EVTHSAAVEA | LKEAGSIVRL | YVMRRKPPA |      |            |            |

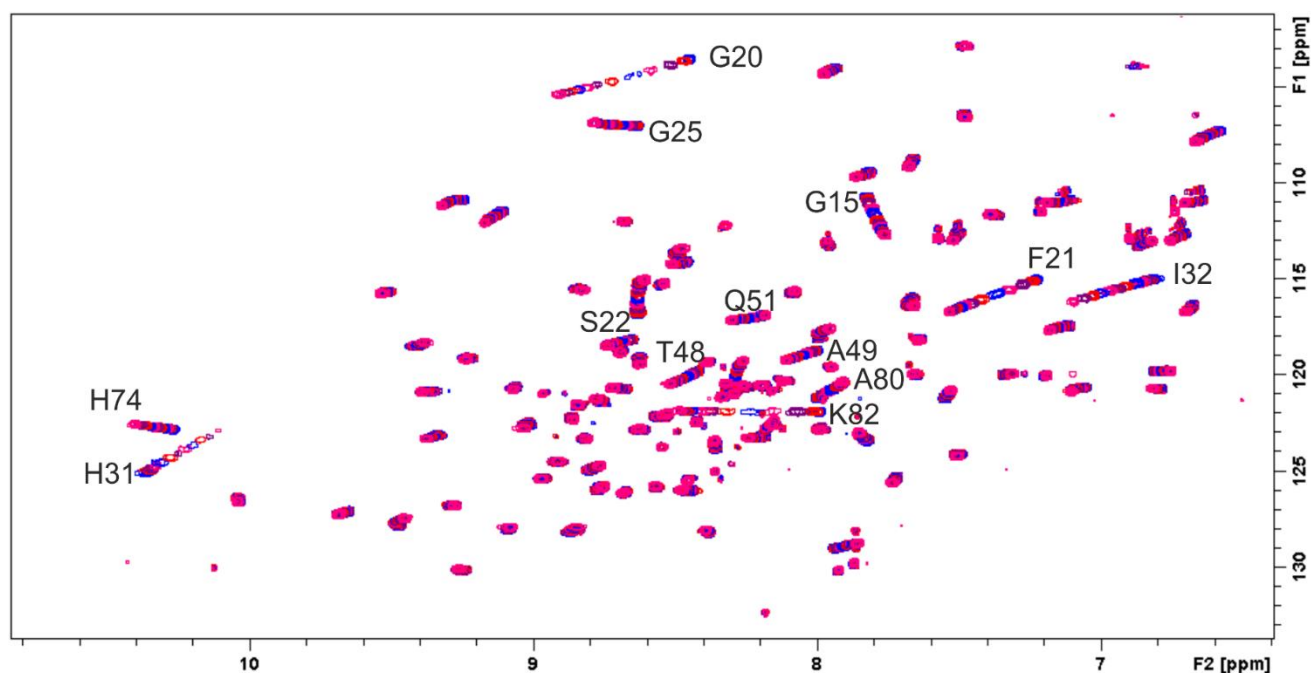

**Figure S22.** Overlay of plots for **4-A047** with Ligand:protein ratio ranging from 1:1 to 100:1. The gradual change in chemical shifts of limited residues indicate that the binding of the ligand is specific and to the putative ligand binding site.

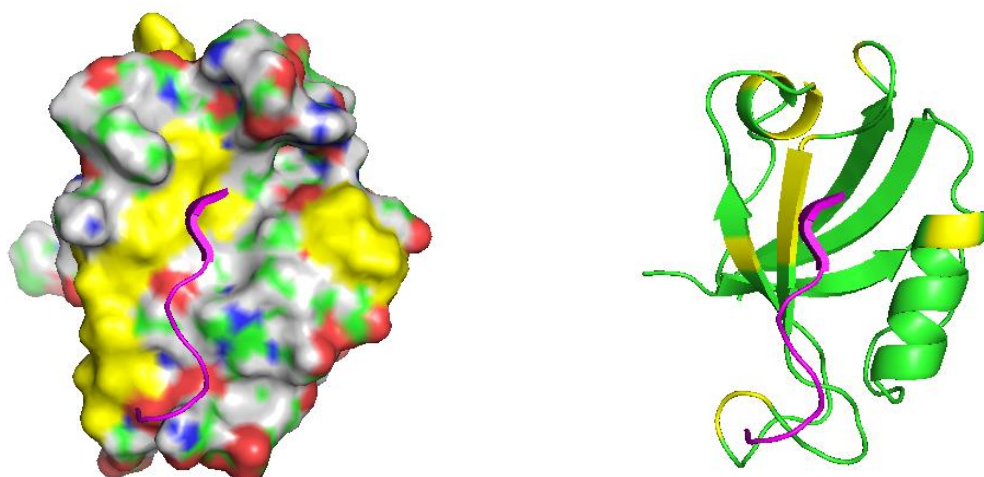

**Figure S23.** Mapping of chemical shift changes onto the structure of PSD95 PDZ1 using PDB Accession Code 2KA9 (cyprin peptide in magenta). Residues whose chemical shifts are affected are coloured yellow; these residues line the binding site.

**Table S7.** Concentration dependent shift changes of compound **4-A047** for a few residues whose chemical shifts have been assigned

| Concentration<br>( $\mu\text{M}$ )        | $^1\text{H}$ Chemical Shifts (ppm) |                |                |                  |                  |
|-------------------------------------------|------------------------------------|----------------|----------------|------------------|------------------|
|                                           | K82                                | G20            | F21            | I32              | H31              |
| 0                                         | 7.99                               | 8.448          | 7.225          | 6.811            | 10.37            |
| 72                                        | 8.01                               | 8.466          | 7.24           | 6.83             | 10.349           |
| 327                                       | 8.0674                             | 8.516          | 7.27           | 6.84             | 10.344           |
| 936                                       | 8.16                               | 8.583          | 7.32           | 6.857            | 10.328           |
| 1512                                      | 8.23                               | 8.652          | 7.365          | 6.875            | 10.309           |
| 2592                                      | 8.32                               | 8.72           | 7.42           | 6.91             | 10.278           |
| 3528                                      | 8.37                               | 8.773          | 7.453          | 6.936            | 10.251           |
| 4392                                      | 8.4                                | 8.812          | 7.478          | 6.967            | 10.22            |
| 5184                                      | 8.44                               | 8.838          | 7.494          | 6.992            | 10.20            |
| 5976                                      | 8.46                               | 8.861          | 7.508          | 7.02             | 10.17            |
| 6912                                      | 8.47                               | 8.885          | 7.521          | 7.057            | 10.15            |
| 7776                                      | 8.47                               | 8.9            | 7.53           | 7.091            | 10.10            |
| EC <sub>50</sub> fitted ( $\mu\text{M}$ ) | 2433 $\pm$ 289                     | 4609 $\pm$ 678 | 3145 $\pm$ 262 | Cannot be fitted | Cannot be fitted |

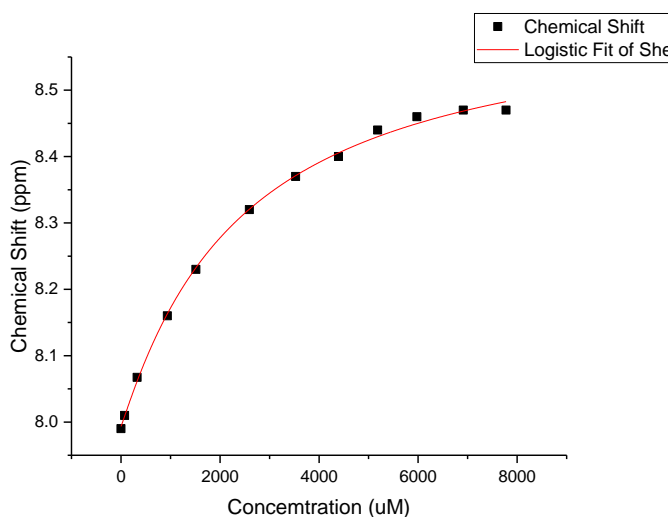

**Figure S24.** Residue K82: EC<sub>50</sub>=2433 $\pm$ 289  $\mu\text{M}$ . A simple logistic fit is used to get this EC<sub>50</sub> value.

**Table S8.** Relative affinities using magnitude of shift changes of residues whose chemical shifts are significantly affected

| Residues                                  |               |                 |                   |               |                    |               |                 |
|-------------------------------------------|---------------|-----------------|-------------------|---------------|--------------------|---------------|-----------------|
| Top shift changes seen in these residues  | <b>4-A047</b> | <b>3-A048</b>   | <b>4-A048</b>     | <b>3-A144</b> | <b>4-A144</b>      | <b>4-A161</b> | <b>GKAP</b>     |
| G15                                       | 0.096         | 0.075           | 0.109             | 0.028         | 0.130              | 0.022         | 0.08            |
| G20                                       | 0.163         | 0.121           | 0.184             | 0.043         | 0.218              | 0.035         | 0.133           |
| F21                                       | 0.124         | 0.097           | 0.142             | 0.035         | 0.176              | 0.028         | 0.106           |
| S22                                       | 0.087         | 0.069           | 0.101             | 0.025         | 0.123              | 0.022         | 0.066           |
| G25                                       | 0.037         | 0.025           | 0.042             | 0.01          | 0.039              | 0.011         | 0.057           |
| H31                                       | 0.067         | 0.046           | 0.051             | 0.035         | 0.070              | 0.035         | 0.068           |
| I32                                       | 0.049         | 0.035           | 0.039             | 0.022         | 0.052              | 0.026         | 0.049           |
| T41                                       | 0.018         | 0.013           | 0.016             | 0.0055        | 0.026              | 0.0037        | 0.015           |
| A48                                       | 0.041         | 0.033           | 0.048             | 0.013         | 0.06               | 0.0099        | 0.035           |
| A49                                       | 0.042         | 0.031           | 0.050             | 0.011         | 0.058              | 0.0099        | 0.038           |
| Q51                                       | 0.034         | 0.027           | 0.039             | 0.01          | 0.048              | 0.0073        | 0.031           |
| A80                                       | 0.059         | 0.042           | 0.026             | 0.014         | 0.02               | 0.012         | 0.044           |
| K82                                       | 0.169         | 0.123           | 0.190             | 0.039         | 0.229              | 0.032         | 0.138           |
| Affinities relative to <b>6 (4-A047)*</b> |               | Slightly weaker | Slightly stronger | Weakest       | Possibly strongest | Weakest       | Slightly weaker |

\* Although the relationship between shift magnitude and affinity should be used cautiously, it is valid here as we are evaluating a well established interaction using a series of structurally and closely related ligands, considered as binding in a specific way.

## 2. Materials and methods

### 2.1. Peptide Synthesis and purification

#### 2.1.1. General methods

All Fmoc-protected amino acids and coupling reagents were purchased from Novabiochem (Merck) or from Fluorochem. DMF used for couplings was ACS grade from VWR. Peptides were synthesized either manually or using microwave assisted synthesis.

Manual couplings were performed using solid phase peptide synthesis using 5 equivalent amino acid excess unless otherwise stated, using HCTU (5 eq) and DIEA (10 eq) as coupling reagents and base in a fritted SPE tube, shaking the coupling mixture at room temperature for 2 hours or overnight.

Microwave assisted synthesis was performed on CEM Liberty Blue peptide synthesizer using 5 equivalent amino acid excess and DIC (5 equivalent) and Oxyma (5 equivalent) as coupling reagents. Single couplings were performed at 90 °C for 60s. Arginine was double coupled at 75 °C for 5 minutes. Deprotection solution was 20% piperidine in DMF. Coupling efficiency was monitored using UV absorbance after Fmoc deprotection.

N-terminal acetylation of the peptides was performed manually in a fritted SPE tube using 50 equivalents acetic anhydride and DIPEA in DMF: DCM 1:1 (1ml) for 2 x 30 minutes. Peptides were cleaved using TFA: TIPS: water 90:5:5 (w/w) mixture for 3 hours. After cleavage the TFA was evaporated and the residual was dissolved in DMSO.

Preparative purifications were performed using RP-HPLC on an Agilent 1260 Infinity HPLC equipped with a diode array and a mass-detector using a Kinetex EVO C18 (250mm x 21.2 mm, Phenomenex) column at 10 ml/min flow rate. Eluents were A: 0.1% formic acid in H<sub>2</sub>O and B: 0.1% formic acid in acetonitrile using a gradient of 5-35 or 5-45% B over 35 minutes. Collected fractions were analysed using LC-MS (Eluents were A: 0.1% formic acid in H<sub>2</sub>O and B: 0.1% formic acid in acetonitrile), pure fractions were freeze dried. To assess purity analytical UV-HPLC were performed on Agilent 1260 infinity HPLC. High resolution mass spectrometry was performed on Bruker maXis II™ ESI-QTOF mass spectrometer.

### 2.1.1. Synthesis of peptide hydrazides

C-terminal peptide hydrazides (**1-2**) were synthesized on Fmoc-hydrazono-pyruvyl-aminomethylpolystyrene resin (Iris Biotech) on 0.1 mmol scale. The first amino acid was coupled manually overnight and the synthesis was continued on CEM Liberty Blue peptide synthesizer, peptides were acetylated and cleaved as described above.

For peptides containing hydrazide on the N-terminus (**2-3**), first the TRL sequence was synthesized manually on Fmoc-Leu-Wang resin as described above. For compound **2** with the C2 linker 4-(N'-tert-butoxycarbonyl-hydrazino)-4-oxo-butyric acid (1.2 equivalents) was dissolved in DMF together with 1.2 equivalents HCTU and added to the resin, to which 2 equivalents of DIPEA was added and coupled at room temperature for 3 hours. For compound **3** with the C3 linker 4-(N'-tert-butoxycarbonyl-hydrazino)-4-oxo-propionic acid (1.2 equivalents) was dissolved in DMF together with 1.2 equivalents HCTU and added to the resin, to which 2 equivalents of DIPEA was added and coupled at room temperature for 3 hours (Scheme S1). Coupling was repeated twice, followed by cleavage using TFA:TIPS:water 90:5:5 (w/w) mixture for 3 hours. TFA was evaporated and crude hydrazides were dissolved in DMSO.

In order to yield hydrazones (**1-A001, 2-A001, 3-A001, 3-A047, 3-A048, 3-A144, 3-A161, 4-A001, 4-A047, 4-A048, 4-A144, 4-A161**) approximately 20-fold excess of the corresponding aldehyde fragment was added to the crude peptide hydrazides in DMSO and hydrazone formation was followed by LCMS. After completion, the formed hydrazones were purified by RP-HPLC. In order to maintain stable hydrazones the freeze dried compounds were dissolved in either 20 mM Tris, 150 mM NaCl, pH 7.5 or in 50 mM NH<sub>4</sub>Ac, pH 7.5 buffer.

## 2.2. Protein expression and purification

Human Shank1 PDZ domain (656-762) was cloned into the pGEX-6P-2 expression vector and transformed to BL21 Gold cell line. 10 ml overnight starter culture was inoculated to 1 L 2xYT media containing 50 µg/ml chloramphenicol. Cells were grown at 37 °C until OD<sub>600</sub> 0.6-0.8 and induced with 0.1 mM IPTG and incubated overnight at 18 °C. Cells were harvested and resuspended in 20 mM Tris, pH 8, 500 mM NaCl, containing protease inhibitor and 1U of DNase I per litre of cell culture. Cells were lysed by sonication (8 cycles, 20 seconds on 40 seconds off, 10 µA) and centrifuged at 25,000 g for 45 minutes at 4 °C. The supernatant was filtered

(0.22  $\mu\text{m}$  membrane) and applied to glutathione beads and washed with 10 CV 20 mM Tris, pH 8, 500 mM NaCl. GST was cleaved on-column overnight at 4 °C using Prescission protease. The eluted fractions were concentrated and purified by size-exclusion chromatography on S75 26/60 pg column in 20 mM Tris, 150 mM NaCl, 5% glycerol pH 7.5 buffer. Collected fractions were analysed by SDS-PAGE and concentrated. Pure protein was analysed by high resolution mass spectrometry: expected  $m/z$ : 12326.3 measured  $m/z$ : 12325.6. Concentration was determined by UV-VIS spectroscopy using the  $8480 \text{ M}^{-1} \text{ cm}^{-1}$  extinction coefficient.

PSD-95 PDZ1 was prepared as described in Volgrig *et. al* (2013) ACS Chem Biol, 8: 2209-2216.<sup>3</sup>

### 2.3. Aldehyde library selection

A diverse subset of fragments was selected from commercially available small molecule aldehydes (Aldrich<sup>CPR</sup>, Fluorochem and Acros). Available compounds having one aldehyde functionality were filtered first based on physicochemical properties:  $80 \text{ Da} < \text{MW} < 400 \text{ Da}$ , HBA, HBD  $\leq 3$ , and  $\text{clogP} \leq 5$ . To select a diverse set of compounds, first, binary molecular fingerprints were generated for each molecule using the *FragFp* descriptor implemented in DataWarrior (openmolecules.org), which relies on a predefined substructure fragment library and is used to compare 2D structural similarities. Then, using the same software, structurally dissimilar subset of compounds was selected based on the molecular fingerprints. Compounds were further excluded based on undesired functional groups and commercial availability, which resulted in a library of 165 aldehydes including a subset of 36 compounds having carboxylic acid functional groups.

### 2.4. Fluorescence anisotropy

#### 2.4.1. General comments

Fluorescence anisotropy assays were performed in 384-well plates (Greiner Bio-one) and the fluorescence anisotropy measured using a Perkin Elmer EnVision<sup>TM</sup> 2103 MultiLabel plate reader, with excitation at 480 nm (30 nm bandwidth), polarised dichroic mirror at 505 nm and emission at 535 nm (40 nm bandwidth, S and P polarised) at a controlled temperature of 25 °C. Fluorescence anisotropy data was processed as described previously.<sup>4</sup> The data from both



the P (perpendicular intensity) and S (parallel intensity) channels, resulting from this measurement and corrected by subtracting the corresponding control wells, were used to calculate the intensity and anisotropy for each well following Equations 1 and 2:

$$I = (2PG) + S \quad \text{Equation 1}$$

$$r = (S - PG) \quad \text{Equation 2}$$

*r = anisotropy, I = total intensity, P = perpendicular intensity, S = parallel intensity, G is an instrument gain factor.*

#### 2.4.2. Direct titration

Assays were performed in 50 mM NH<sub>4</sub>Ac, 10 mM aniline, pH 6.5 buffer. Shank 1 PDZ was dialysed into the assay buffer prior to the experiment. Fluorescence anisotropy direct titration assays were performed with protein concentration diluted over 24 points using ½ dilutions. 20 µL of buffer were first added to each well then 20 µL of protein solution was added to the first column. The well solution was mixed and 20 µL was taken out and added to the next column, which resulted in a serial dilution of the protein across the plate, starting from 50 µM final protein concentration. Finally, 20 µL of tracer (FITC-Ahx-TRL-COOH) was added to the wells. For control wells, the tracer peptide was replaced with an identical volume of assay buffer and plates were read immediately, and after an hour or after 24 hours.

$$L_b = (r - r_{\min}) / \lambda(r_{\max} - r) + r - r_{\min} \quad \text{Equation 3}$$

$$y = \{(k + x + [FL]) - \sqrt{(k + x + [FL])^2 - 4x[FL]}\} / 2 \quad \text{Equation 4}$$

*r = anisotropy, I = total intensity, P = perpendicular intensity, S = parallel intensity, L<sub>b</sub> = fraction ligand bound, λ = I<sub>bound</sub>/I<sub>unbound</sub> = 1, [FL] = concentration of fluorescent ligand, k = K<sub>d</sub> and x = [added titrant], G is an instrument gain factor.*

#### 2.4.1. Competition assay

Experiments were performed in either 50 mM NH<sub>4</sub>Ac, pH 6.5 buffer containing 10 mM aniline. FA competition assays were performed with the concentration of the competitor starting 100 µM, which was serially diluted over 12 points in a 1/2 regime with fixed protein

and tracer concentrations. 20  $\mu\text{L}$  of protein and 20  $\mu\text{L}$  of FITC-Ahx-TRL-COOH tracer were added to each well to give a final concentration of 1  $\mu\text{M}$  and 10 nM respectively, matching the concentrations with the screening conditions. For control wells, the tracer peptide was replaced with an identical volume of assay buffer. The total volume in each well was 60  $\mu\text{L}$ . Plates were read immediately after incubation at room temperature. The calculated average anisotropy values and their standard deviation were then fitted to a sigmoidal logistic model (Equation 5) using OriginPro 9.0. which provided the IC50 and error values.

$$y = r_{\max} + (r_{\min} - r_{\max}) / (1 + (x/x_0)^p) \quad \text{Equation 5}$$

#### 2.4.2. Library screening

Screening was performed using fluorescence anisotropy competition assay, in 50 mM  $\text{NH}_4\text{Ac}$  pH 6.5 buffer containing 10 mM aniline. Each sample was prepared in duplicates. Screening was performed at 10 or 50  $\mu\text{M}$  concentration of **1-4** using 5-fold excess of aldehydes in each well, with 1  $\mu\text{M}$  protein and 10 nM final tracer concentration. Aldehyde stock solutions were prepared in DMSO at 100 mM concentration and pipetted into a 96-well plate, which then was further diluted into the assay buffer to the appropriate concentration. First, 10  $\mu\text{L}$  hydrazone **1-,2-,3-,4-A001** and control peptides GKAP and TRL (from a 300 or 60  $\mu\text{M}$  stock solution) was added to each well, which was followed by the addition of 10  $\mu\text{L}$  of aldehyde solutions (from 1.5 or 0.3 mM stock). Then 20  $\mu\text{L}$  SHANK1 PDZ protein was added to each well from a 3  $\mu\text{M}$  stock solution. The plate was sealed and hydrazone formation was allowed to proceed at room temperature for 24 hours. After 24 hours 20  $\mu\text{L}$  FITC-Ahx-TRL-COOH was added to the experiment wells or equal amount of buffers was added to the blanks and the plate was read immediately. All plates were prepared with the following controls: i) negative control without any competitor, ii) positive controls: GKAP, TRL iii) starting compounds without aldehydes. Aldehydes were tested on their own without having hydrazides in the solution to exclude any effect on fluorescence intensity.

Anisotropy was calculated as described above, duplicates were averaged. Anisotropies were normalized relative to the negative buffer control. Two different threshold values were used to assess hit compounds, which was calculated based on the average relative anisotropy calculated for the negative control or the TRL control peptide - 3 x standard deviation.

## 2.5. Isothermal titration calorimetry

ITC experiments were carried out using Microcal ITC200i instrument (Malvern) at 25°C in 20 mM Tris, 150 mM NaCl, pH 7.5 buffer. Shank1 PDZ was dialysed against the buffer prior to experiment, lyophilized peptides and hydrazones were dissolved in the same buffer. 75 or 150 µM Shank1 PDZ was present in the cell and titrated with 0.8 – 1.5 mM peptide solutions, depending on compound solubility, from the syringe using 2 µL injections with 120 s spacing between the injections for 20 injection. Heats of peptide dilution were measured by titrating the peptide into buffer and subtracted from each measurement. Data was analysed using Microcal Origin 8 and fitted to a one-binding site model.

## 2.6. Co-crystallization

SHANK1 PDZ was incubated with ligands at a 1:1.2 to 1-1.5 molar ratio in 25 mM Tris, 150 mM NaCl pH 7.5 buffer having 10.5 mg/ml final protein concentration. Sparse matrix screening using the JCSG Core suites (Qiagen) was performed with the sitting-drop vapor-diffusion method at 20 °C. Protein was mixed with crystallization solution at a 1:1 ratio with final drop volume of 0.2 µl. Initial hit conditions were further optimized by screening HEPES pH 7 – 8.25 in 0.25 pH steps and PEG 400 concentration from 25-40% in 5% steps, crystals grew within 2-3 weeks. Crystals were flash cooled in liquid nitrogen without addition of any further cryoprotectant and sent to Diamond Light Source (DLS) for data collection. Data were collected at 100 K. For compounds **3-A047**, **3-A048**, and **4-A048** data were processed with the xia2<sup>5</sup> bundle using DIALS<sup>6</sup> for integration and Pointless<sup>7</sup>, Aimless<sup>8</sup> for scaling and merging. For compound **4-A047**, data was processed using autoPROC<sup>9</sup>, XDS<sup>10</sup>, Aimless<sup>8</sup> and STARANISO<sup>11</sup>. Phasing was performed by molecular replacement using Phaser<sup>12</sup> and using Chain A from 1Q30.pdb as a search model. Initial refinement was done using REFMAC<sup>13</sup> with model building in COOT<sup>14</sup> using the CCP4i2<sup>15</sup> software package. Further refinements and TLS refinement were done in PHENIX<sup>16</sup> and the structures were analysed by Molprobit<sup>17</sup>. CIF files for the ligands were generated by AceDRG<sup>18</sup> implemented in CCP4i2.

## 2.7. Molecular dynamics simulations

All simulations were performed as NPT ensembles at 310 K using periodic boundary conditions. The simulations were based on the crystal structure of 3-A048-SHANK complex. Hydrogens, consistent to pH7, were added to the complex. Short range electrostatic and van der Waals' interactions were truncated at 1.4 nm while long range electrostatics were treated with the particle-mesh Ewald's method and a long-range dispersion correction applied. A simulation box extending 2 nm from the protein was filled with TIP3P waters and 150 mM Na and Cl ions added to attain a neutral charge overall. Pressure was controlled by the Berendsen barostat and temperature by the V-rescale thermostat. The simulations were integrated with a leap-frog algorithm over a 2 fs time step, constraining bond vibrations with the P-LINCS method. Structures were saved every 0.1 ns for analysis in each of the three repeat runs over 200 ns. Simulation data were accumulated on the Bristol BrisSynBio supercomputer Bluegem. Analysis: RMSF (Root Mean Square Fluctuation) calculations to determine the distances between the compound's aromatic carboxylate and side chain (and its own) guanidinium groups, over the course of the simulations, was carried out using the pairdist function in GROMACS tools.

Software: The GROMACS-2019.2 suite of software was used to set up and perform the molecular dynamics simulations and analyses. Molecular graphics manipulations and visualisations were performed using VMD-1.9.1 and Chimera-1.10.2 and movies made using VMD. **3-A048** was parametrised by Acypye.<sup>19</sup>

## 2.8. NMR relaxation experiments

All NMR experiments were carried out using Bruker Avance NMR spectrometers operating at 750 MHz <sup>1</sup>H frequency. Temperature was maintained at 298 K. Data were processed using Topspin and analysed in Sparky<sup>20</sup>. <sup>15</sup>N T<sub>1</sub> and T<sub>2</sub> values and <sup>15</sup>N heteronuclear NOE values were obtained from standard experiments<sup>21</sup> recorded at 750 MHz <sup>1</sup>H frequency on 0.32 mM samples (in 5 mM Tris, 100 mM NaCl, pH 7.4) of SHANK1 PDZ, at 1:2 protein:ligand ratio. 0, 50, 90, 190, 390, 590, 790, 1090, 1390, 1790 ms delays and 33.9, 67.8, 101.8, 135.7, 169.6, 203.5, 237.4, 271.4, 339.2, 407.0 ms delays were used respectively for T1 and T2 experiment.

## 2.9. PSD95 PDZ1 Ligand Experiments

NMR spectra were acquired on Bruker Avance III 700 MHz spectrometer equipped with [ $^1\text{H}$ ,  $^{15}\text{N}$ ,  $^{13}\text{C}$ ]-cryoprobe. 1D  $^1\text{H}$  and 2D  $^1\text{H}$ - $^{15}\text{N}$  HSQC spectra of PSD95 PDZ1 were acquired using 100  $\mu\text{M}$  protein dissolved in 20 mM phosphate pH 6.5 at 298K. Ligand titrations were performed by sequential addition of small aliquots of a concentrated sample of the stock ligand dissolved in the same buffer as the protein. All NMR data were processed using TopSpin 3.62; curve fitting was performed using Origin 2016 Software.

## 2.10. Compound characterization

GKAP PBM

Ac-EAQTRL-OH

Exact Mass: 758.3810

| Expected $[M+H^+]^{1+}$ | Measured $[M+H^+]^{1+}$ |
|-------------------------|-------------------------|
| 759.3810                | 759.3994                |

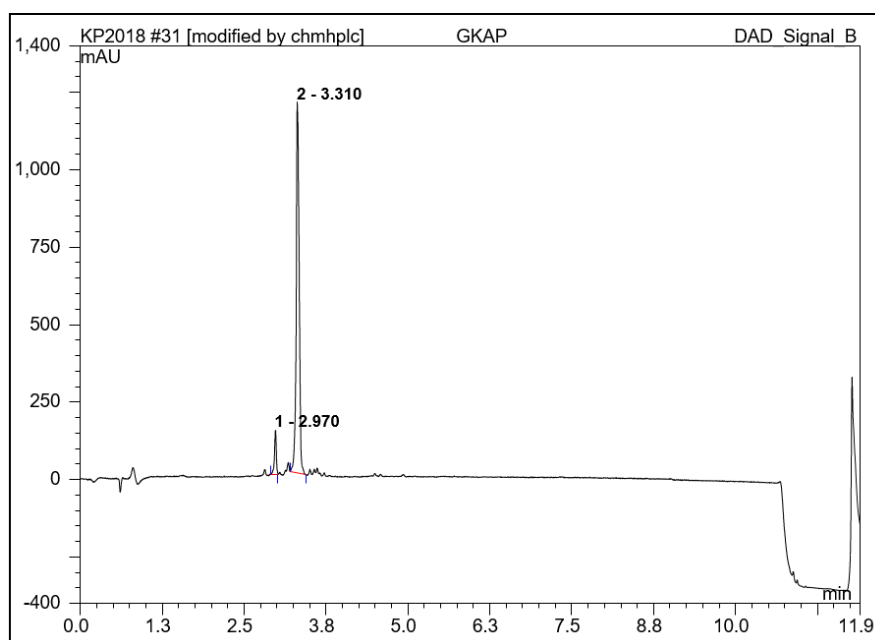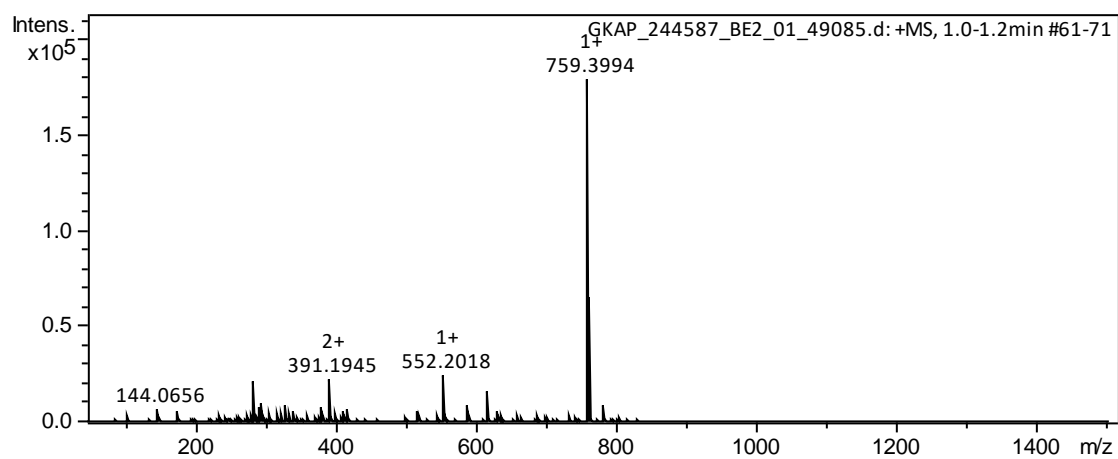

# Ac-TRL-OH

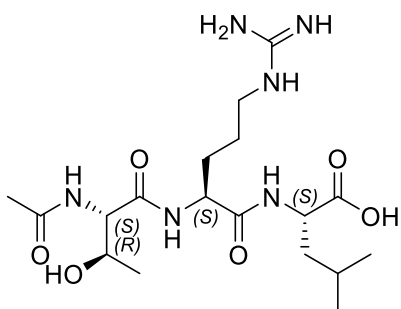

Chemical Formula: C<sub>18</sub>H<sub>34</sub>N<sub>6</sub>O<sub>6</sub>

Exact Mass: 430.2540

| Expected [M+H] <sup>1+</sup> | Measured [M+H] <sup>1+</sup> |
|------------------------------|------------------------------|
| 431.2613                     | 431.2633                     |

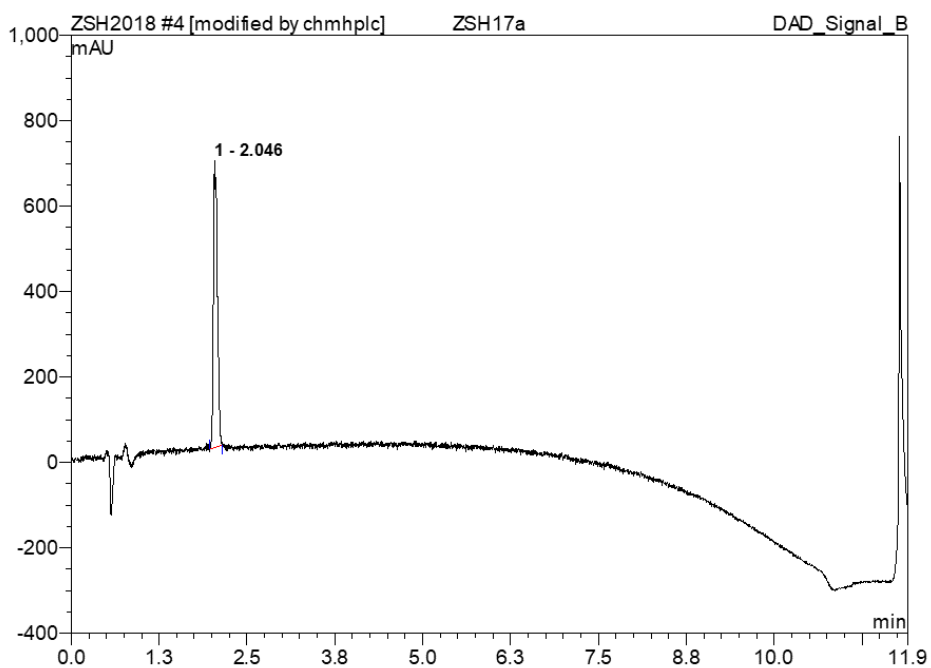

99+% purity

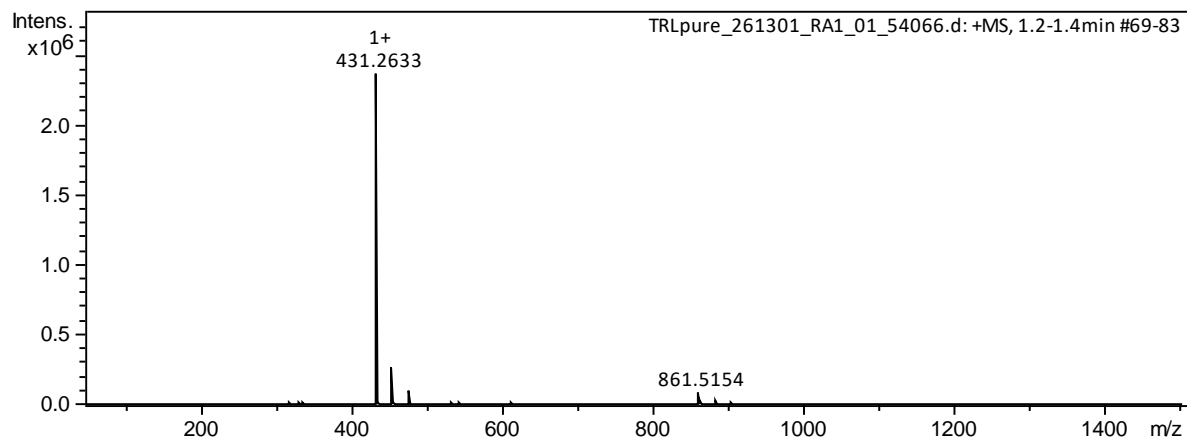



**FITC-Ahx-TRL-OH**

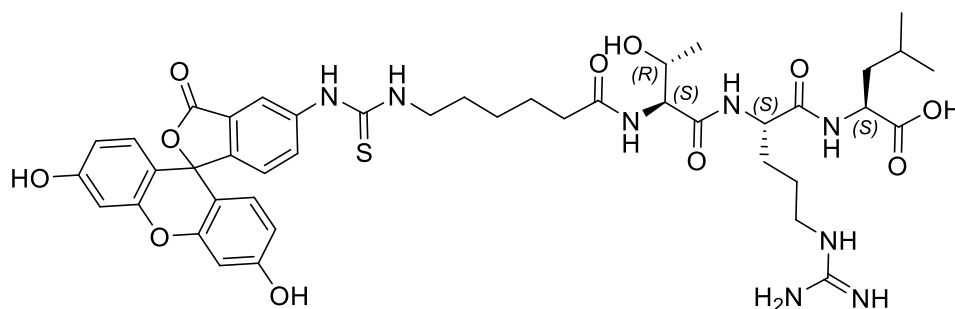

Chemical Formula: C<sub>43</sub>H<sub>54</sub>N<sub>8</sub>O<sub>11</sub>S

Exact Mass: 890.3633

| Expected [M+H] <sup>+</sup> 1+ | Measured [M+H] <sup>+</sup> 1+ | Expected [M+2H] <sup>2+</sup> | Measured [M+2H] <sup>2+</sup> |
|--------------------------------|--------------------------------|-------------------------------|-------------------------------|
| 891.3706                       | 891.3716                       | 446.1889                      | 446.1910                      |

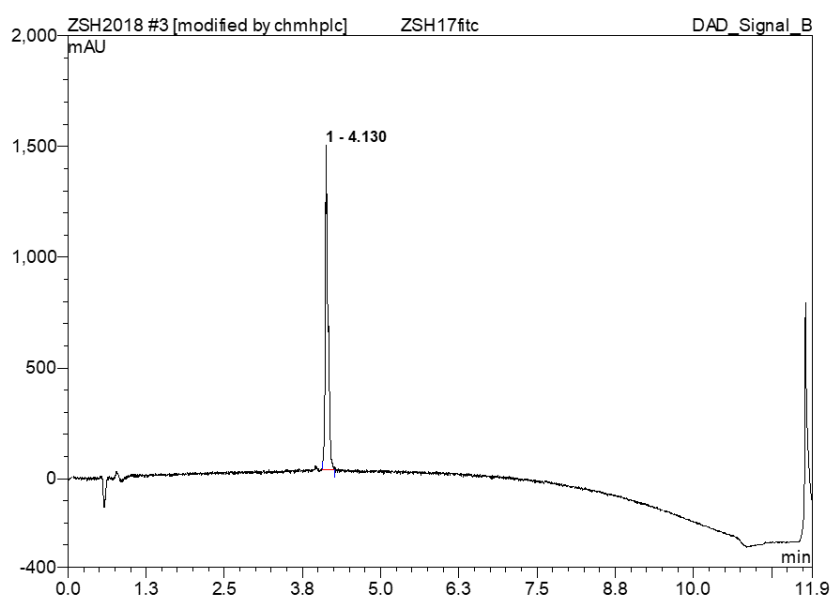

99+ % purity

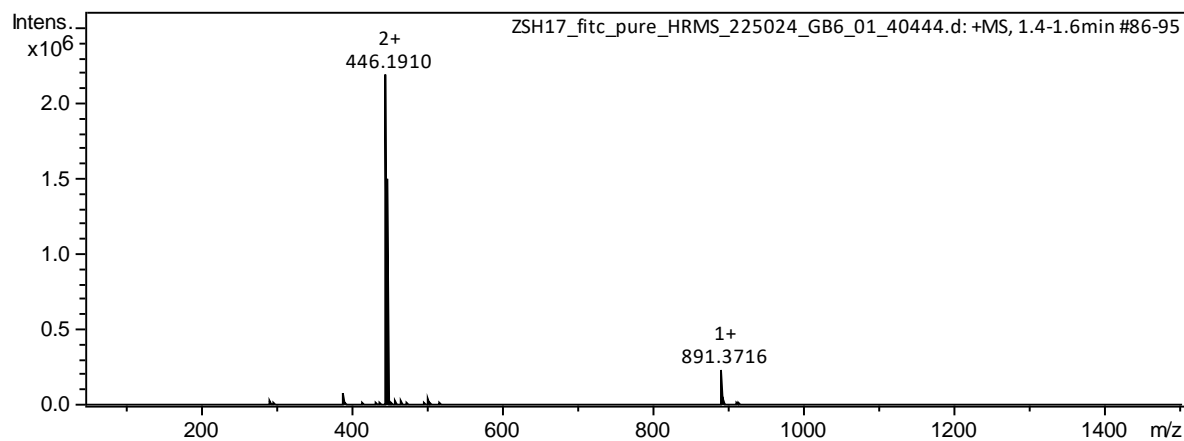

#### 4-(N'-tert-butoxycarbonyl-hydrazino)-4-oxo-butyric acid

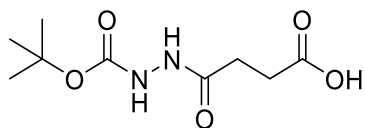

1.0 g (10 mmol) of succinic anhydride and 1.32 g (10 mmol) of *tert*-butyl carbazate were dissolved in 20 mL water. Within 15 min the solution became clear. The reaction mixture was lyophilized and the product was used in SPPS without any further purification. <sup>1</sup>H NMR (DMSO-d<sub>6</sub>, 400.13 MHz):  $\delta$  (ppm) = 1.39 (s, 9H, C(CH<sub>3</sub>)<sub>3</sub>), 2.32 (t, 2H, CH<sub>2</sub>COOH), 2.43 (t, 2H, CH<sub>2</sub>C=ONH), 8.69 (s, 1H, NH-*t*Boc), 9.52 (s, 1H, NHC=OCH<sub>2</sub>); ESI-MS calcd. for C<sub>9</sub>H<sub>16</sub>N<sub>2</sub>O<sub>5</sub> ([M-1H]<sup>-</sup>): 231.0986, found 231.0980

#### 4-(N'-tert-butoxycarbonyl-hydrazino)-4-oxo-propionic acid

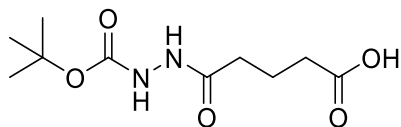

1.1 g (10 mmol) of glutaric anhydride and 1.32 g (10 mmol) of *tert*-butyl carbazate were dissolved in 20 mL water. Within 15 min the solution became clear. The reaction mixture was lyophilized and the product was used in SPPS without any further purification. <sup>1</sup>H NMR (DMSO-d<sub>6</sub>, 400.13 MHz):  $\delta$  (ppm) = 1.39 (s, 9H, C(CH<sub>3</sub>)<sub>3</sub>), 1.71 (quint, 2H, CH<sub>2</sub>CH<sub>2</sub>CH<sub>2</sub>), 2.09 (t, 2H, CH<sub>2</sub>COOH), 2.23 (t, 2H, CH<sub>2</sub>C=ONH), 8.64 (s, 1H, NH-*t*Boc), 9.47 (s, 1H, NHC=OCH<sub>2</sub>); ESI-MS calcd. for C<sub>10</sub>H<sub>18</sub>N<sub>2</sub>O<sub>5</sub> ([M-1H]<sup>-</sup>): 245.1143, found 245.1138.

1-A001

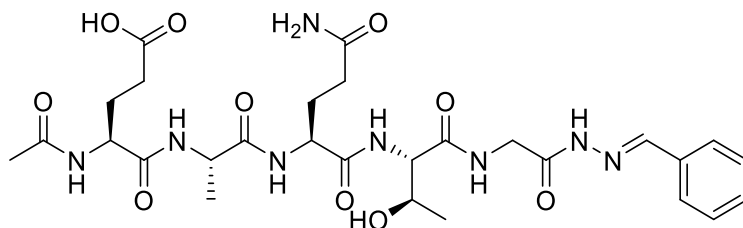

Chemical Formula:  $C_{28}H_{40}N_8O_{10}$

Exact Mass: 648.2867

| Expected $[M+H]^+1+$ | Measured $[M+H]^+1+$ | Expected $[M+Na]^+1+$ | Measured $[M+Na]^+1+$ |
|----------------------|----------------------|-----------------------|-----------------------|
| 649.2940 (hydrazone) | 649.2938             | 671.2766              | 671.2756              |
| 561.2627 (hydrazide) | 561.2621             | 583.2449              | 583.2439              |

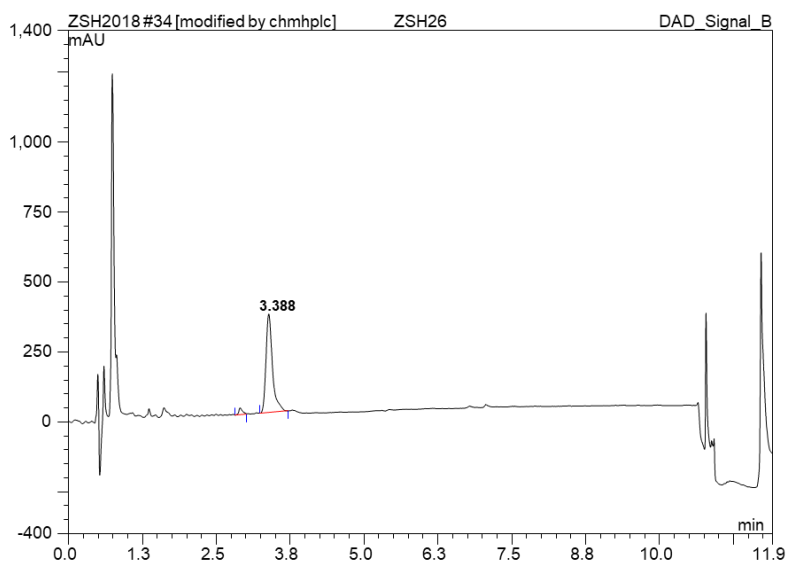

96.2 % purity

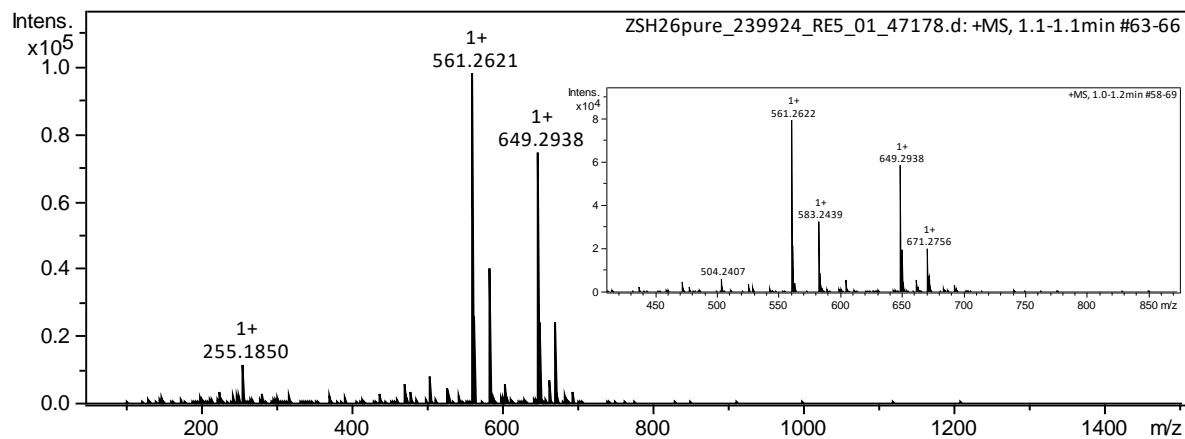

2-A001

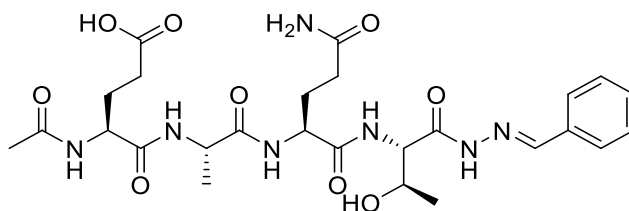

Chemical Formula: C<sub>26</sub>H<sub>37</sub>N<sub>7</sub>O<sub>9</sub>

Exact Mass: 591.2653

| Expected [M+H] <sup>+</sup> <sup>1+</sup> | Measured [M+H] <sup>+</sup> <sup>1+</sup> | Expected [M+Na] <sup>+</sup> <sup>1+</sup> | Measured [M+Na] <sup>+</sup> <sup>1+</sup> |
|-------------------------------------------|-------------------------------------------|--------------------------------------------|--------------------------------------------|
| 592.2726                                  | 592.2721                                  | 614.2554                                   | 614.2539                                   |

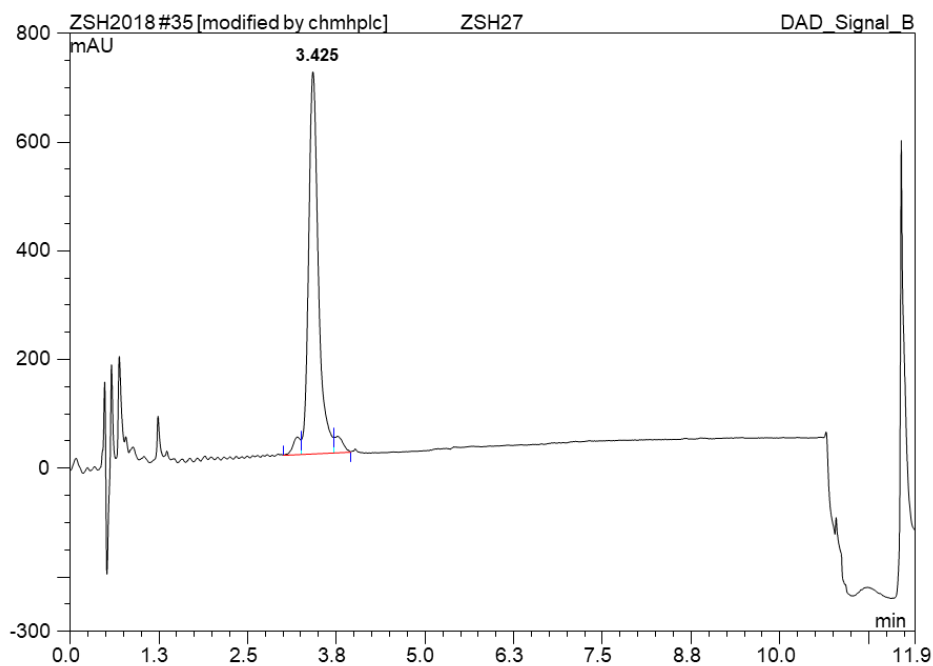

92.7 % purity

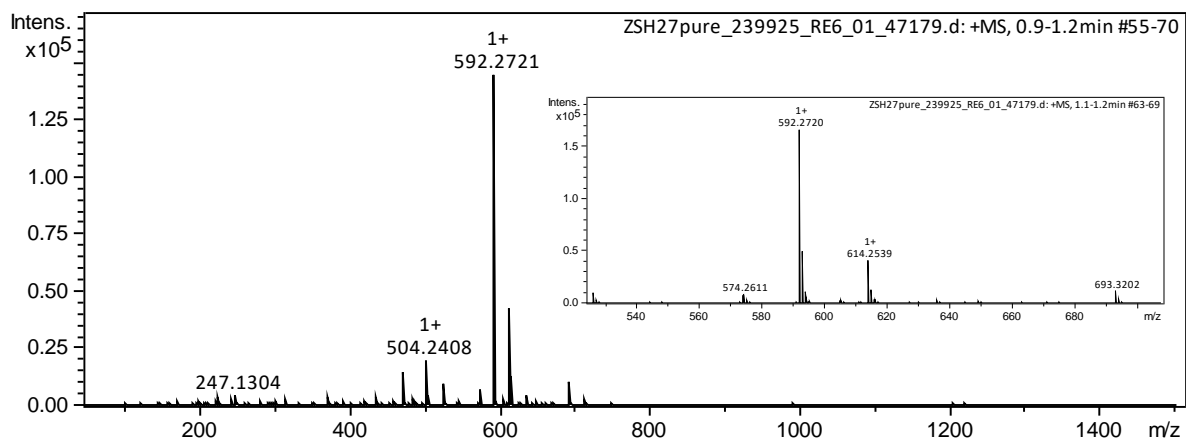

3-A001

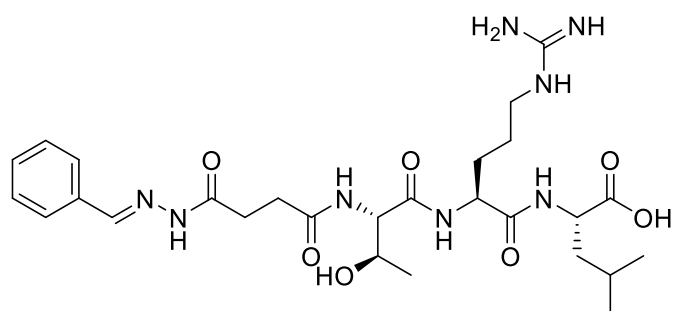

Chemical Formula:  $C_{27}H_{42}N_8O_7$

Exact Mass: 590.3176

| Expected $[M+H]^+$ <sup>1+</sup> | Measured $[M+H]^+$ <sup>1+</sup> | Expected $[M+H]^+$ <sup>2+</sup> | Measured $[M+2H]^+$ <sup>2+</sup> |
|----------------------------------|----------------------------------|----------------------------------|-----------------------------------|
| 591.3249                         | 591.3251                         | 296.1661                         | 296.1663                          |

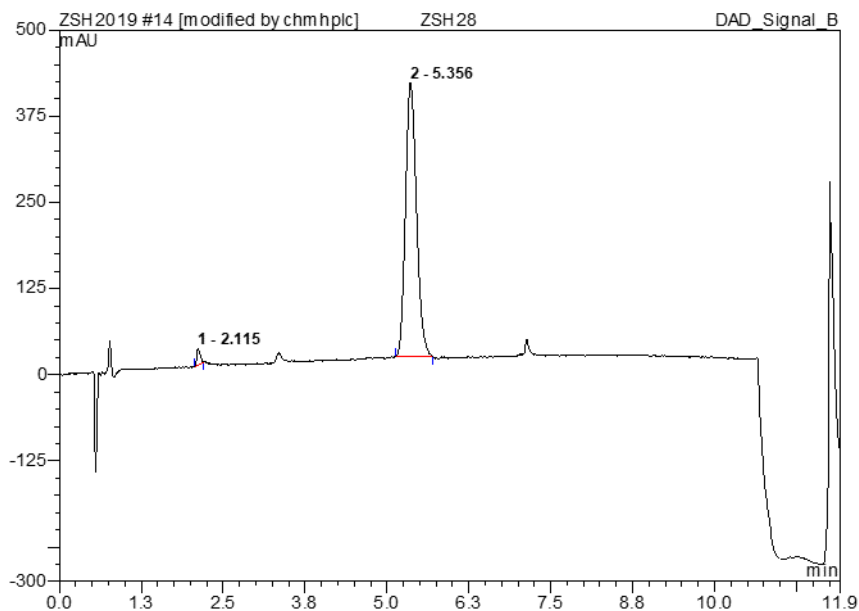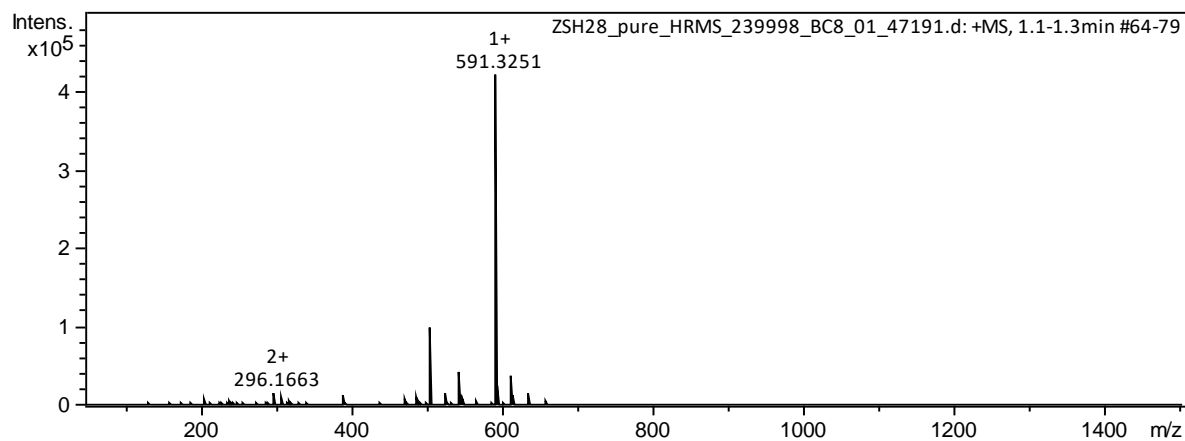

4-A001

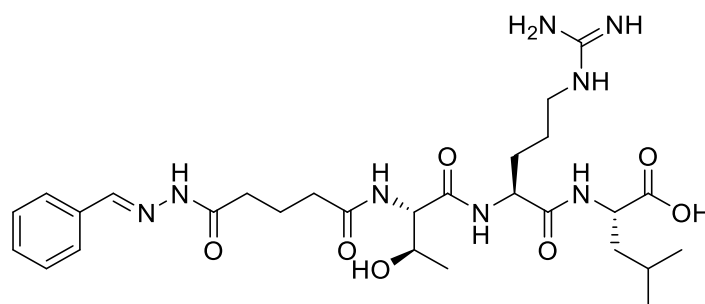

Chemical Formula:  $C_{28}H_{44}N_8O_7$

Exact Mass: 604.3333

| Expected $[M+H]^+$ <sup>1+</sup> | Measured $[M+H]^+$ <sup>1+</sup> | Expected $[M+H+Na]^+$ <sup>2+</sup> | Measured $[M+H+Na]^+$ <sup>2+</sup> |
|----------------------------------|----------------------------------|-------------------------------------|-------------------------------------|
| 605.3406                         | 605.3408                         | 314.1665                            | 314.1652                            |

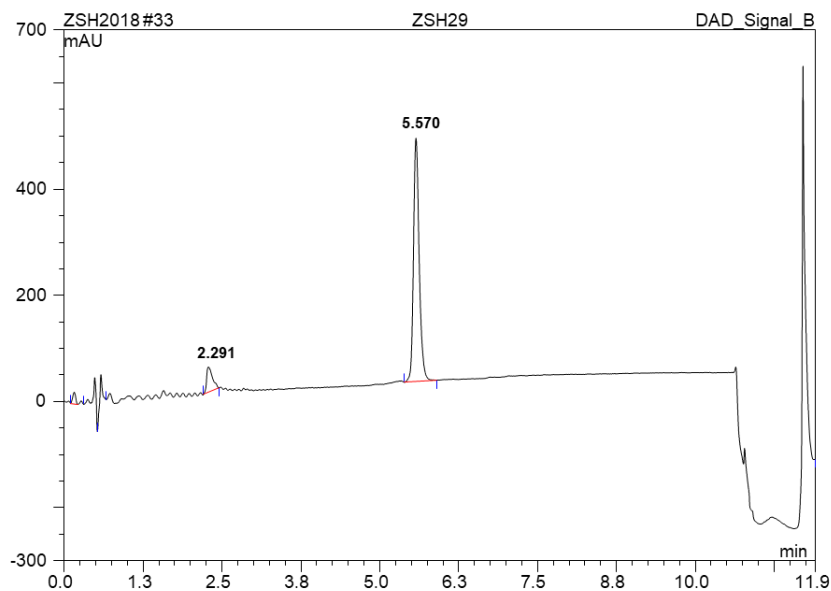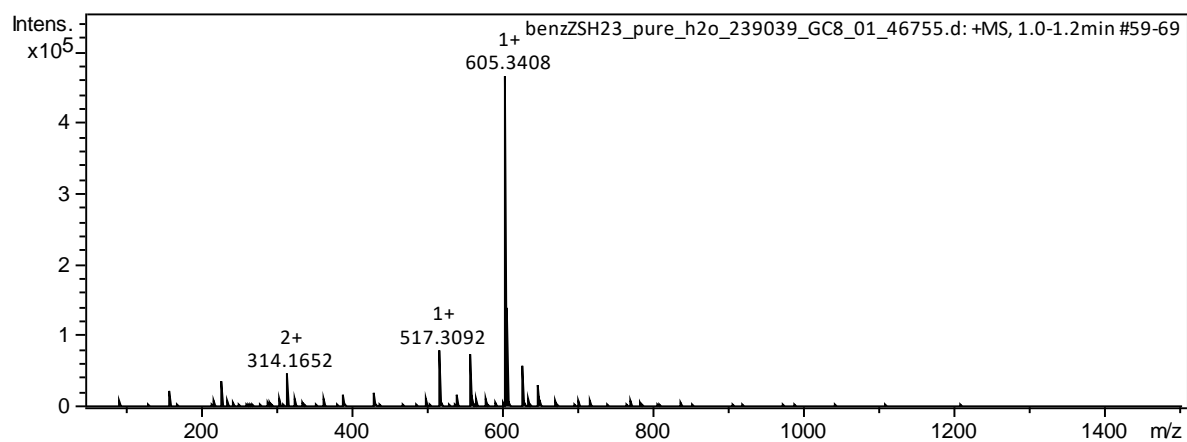



3-A047

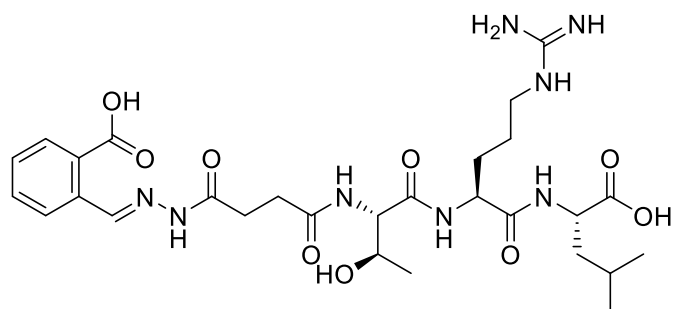

Chemical Formula:  $C_{28}H_{42}N_8O_9$

Exact Mass: 634.3075

| Expected $[M+H]^+$ | Measured $[M+H]^+$ |
|--------------------|--------------------|
| 635.3148           | 635.3138           |

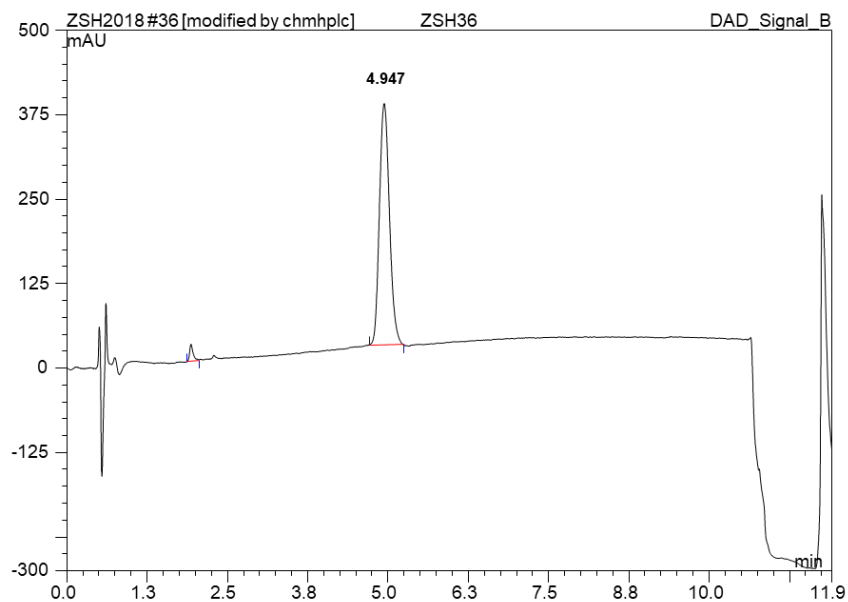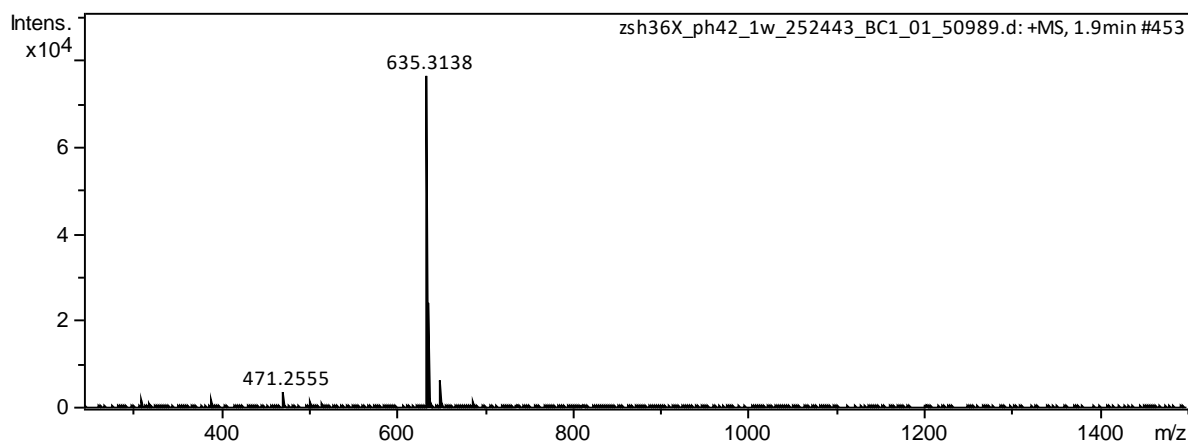

4-A047

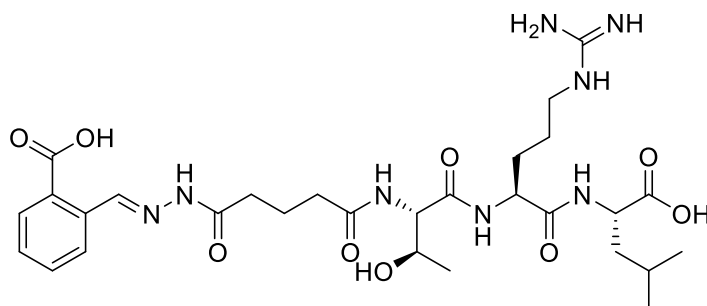

Chemical Formula: C<sub>29</sub>H<sub>44</sub>N<sub>8</sub>O<sub>9</sub>

Exact Mass: 648.3231

| Expected [M+H] <sup>1+</sup> | Measured [M+H] <sup>1+</sup> |
|------------------------------|------------------------------|
| 649.3304                     | 649.3310                     |

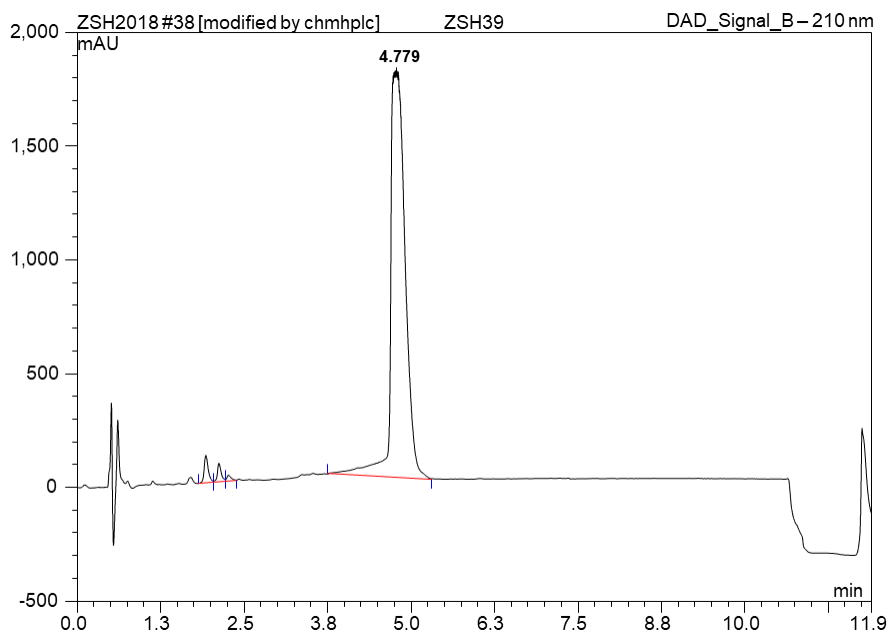

HPLC chromatogram  $\lambda = 210 \text{ nm}$

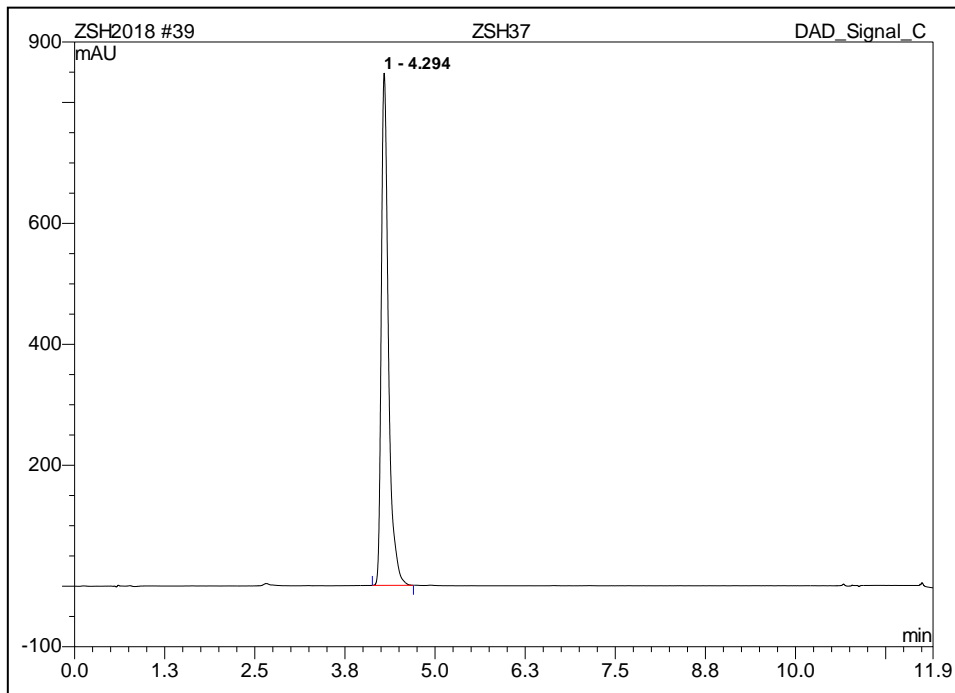

HPLC chromatogram  $\lambda = 280 \text{ nM}$

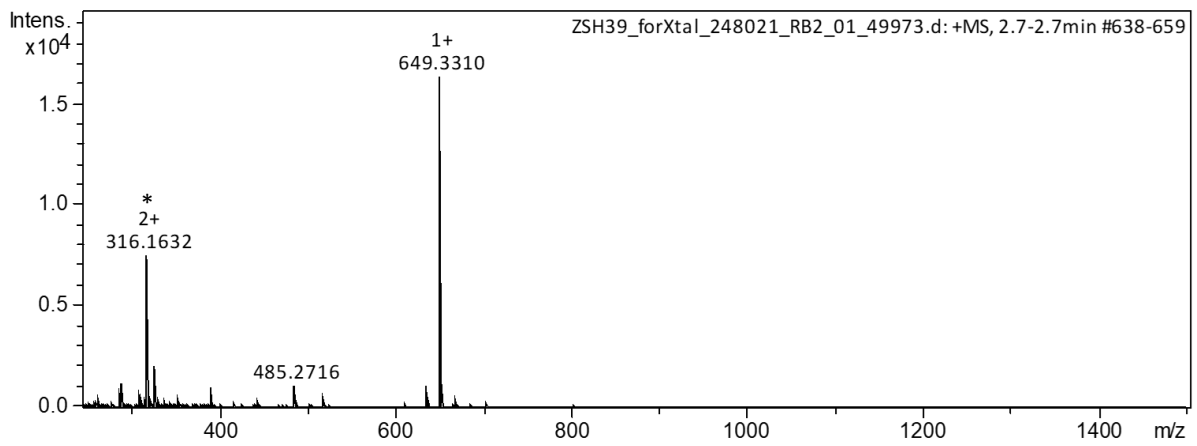

\*  $[M-H_2O+2H^+]^{2+} = 316.1632$

3-A048

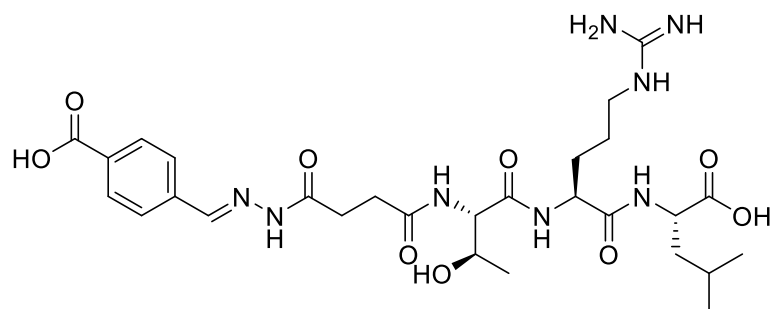

Chemical Formula:  $C_{28}H_{42}N_8O_9$

Exact Mass: 634.3075

| Expected $[M+H]^+$ | Measured $[M+H]^+$ |
|--------------------|--------------------|
| 635.3148           | 635.3139           |

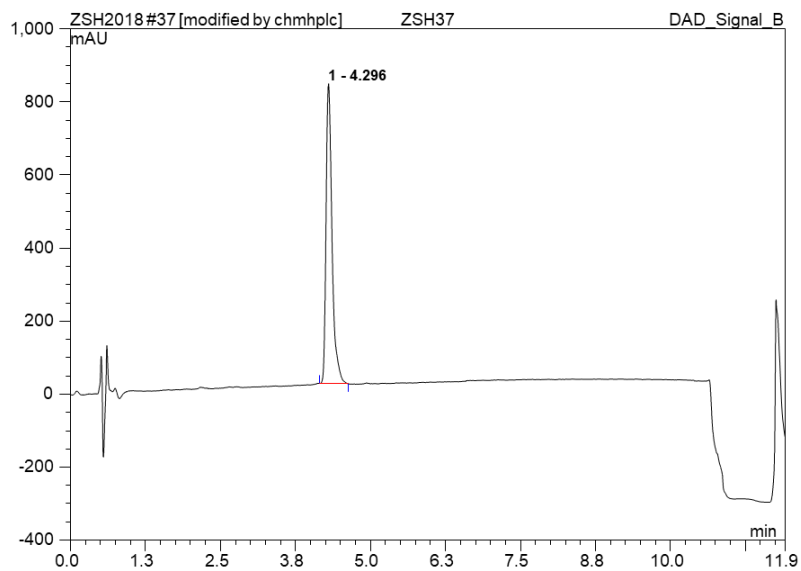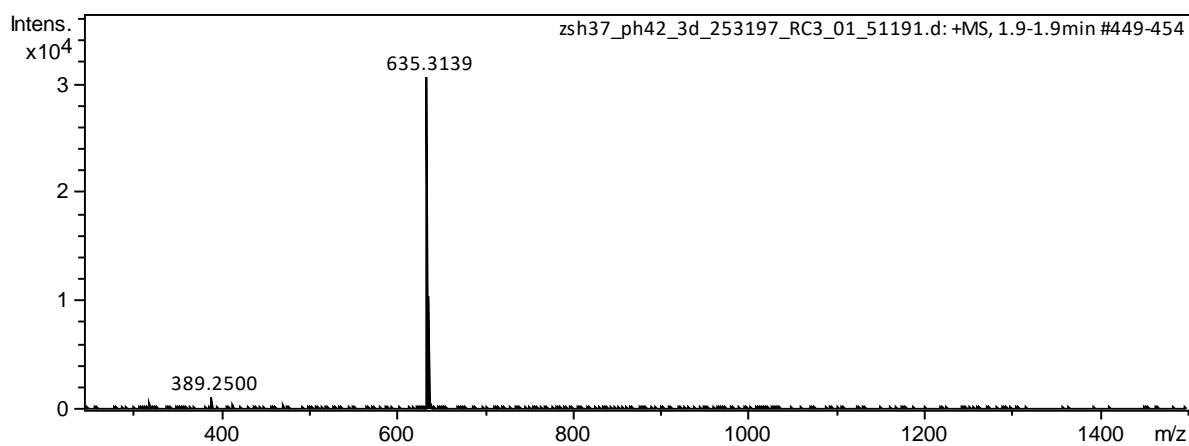

4-A048

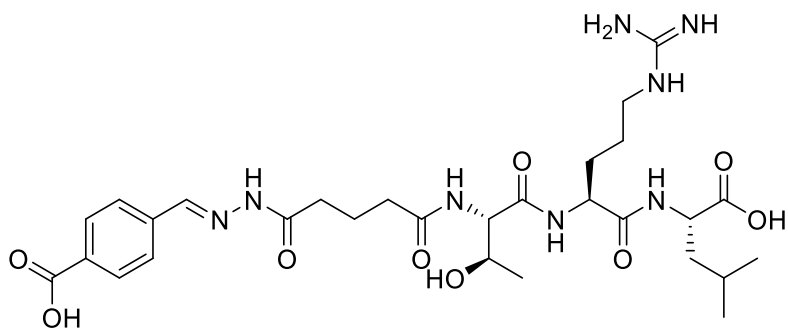

Chemical Formula: C<sub>29</sub>H<sub>44</sub>N<sub>8</sub>O<sub>9</sub>

Exact Mass: 648.3231

| Expected [M+H <sup>+</sup> ] <sup>1+</sup> | Measured [M+H <sup>+</sup> ] <sup>1+</sup> |
|--------------------------------------------|--------------------------------------------|
| 649.3304                                   | 649.3293                                   |

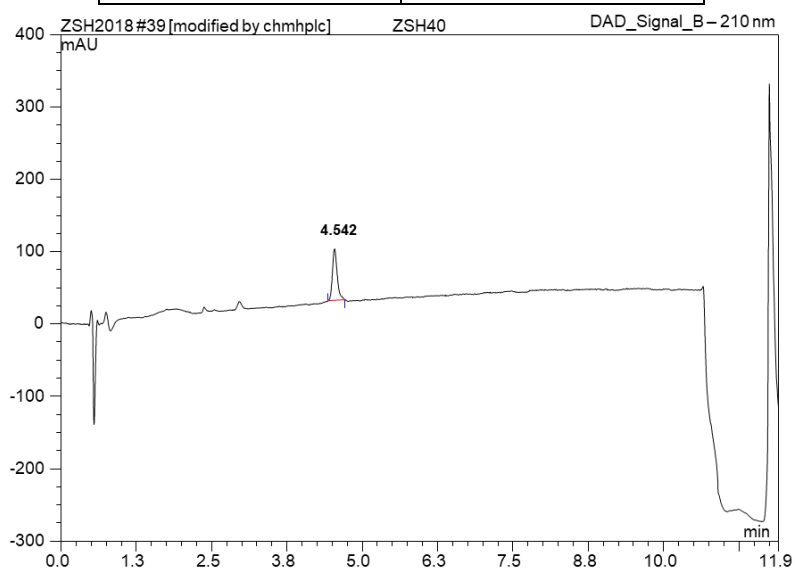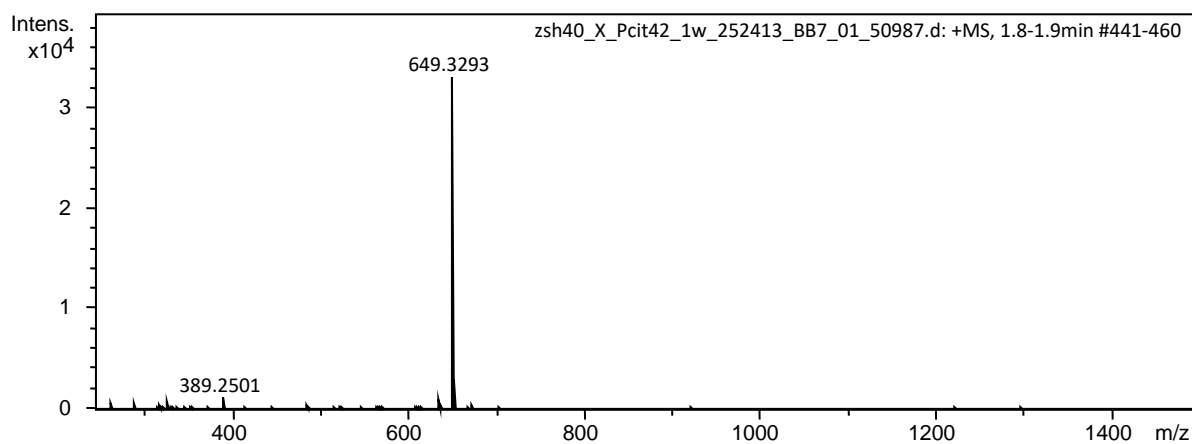

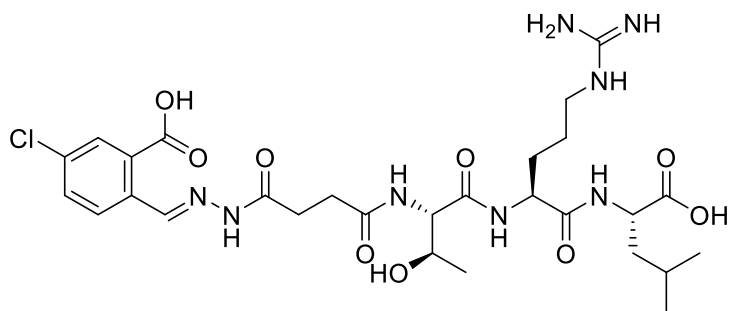

Chemical Formula: C<sub>28</sub>H<sub>41</sub>ClN<sub>8</sub>O<sub>9</sub>

Exact Mass: 668.2685

| Expected [M+H] <sup>+</sup> | Measured [M+H] <sup>+</sup> |
|-----------------------------|-----------------------------|
| 669.2758                    | 669.2756                    |

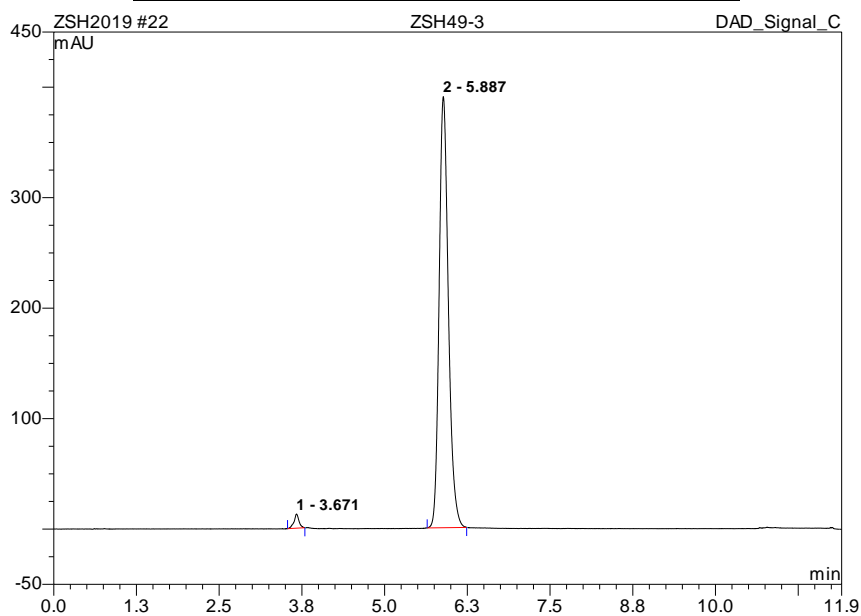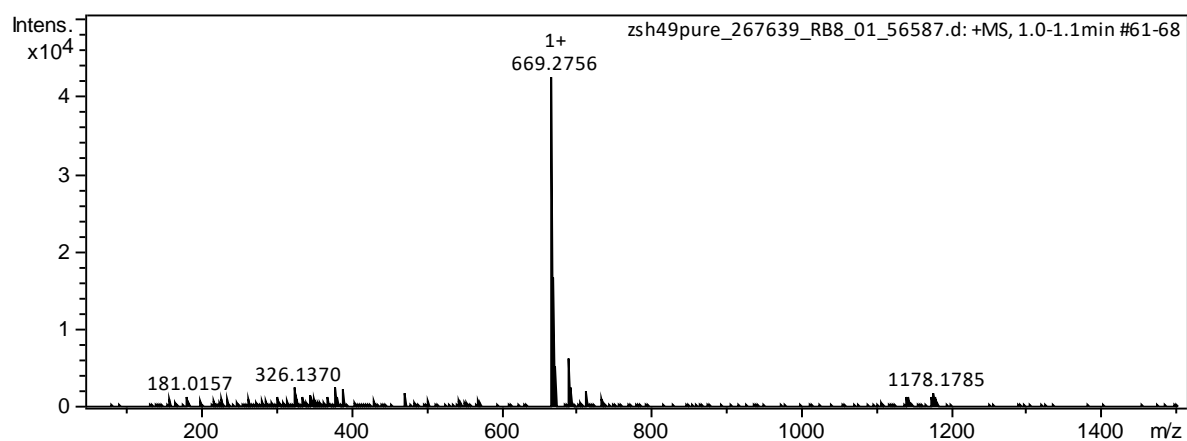

Purity: 98.26 %

4-A144



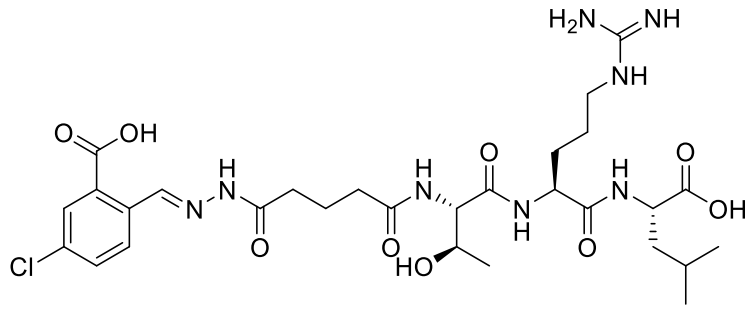

Chemical Formula:  $C_{29}H_{43}ClN_8O_9$

Exact Mass: 682.2842

| Expected $[M+H^+]^{1+}$ | Measured $[M+H^+]^{1+}$ |
|-------------------------|-------------------------|
| 683.2915                | 683.2909                |

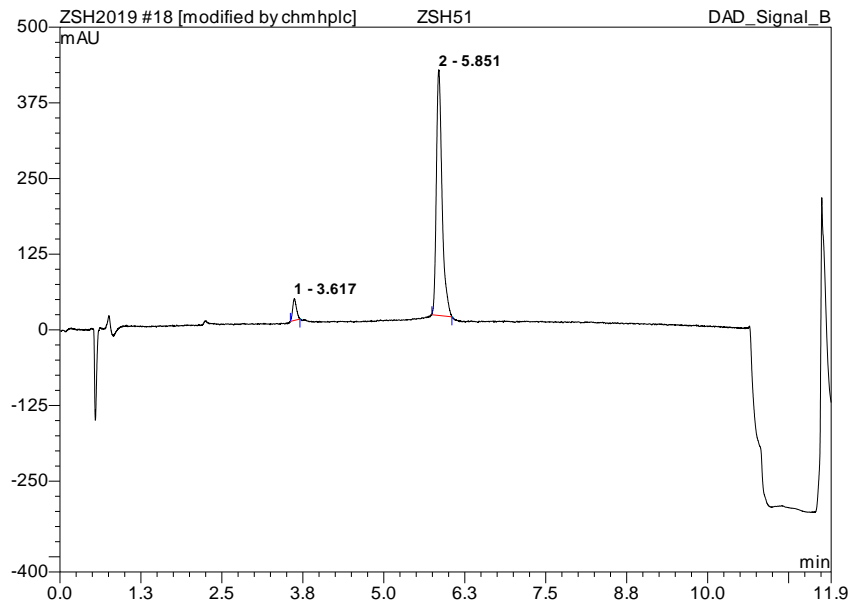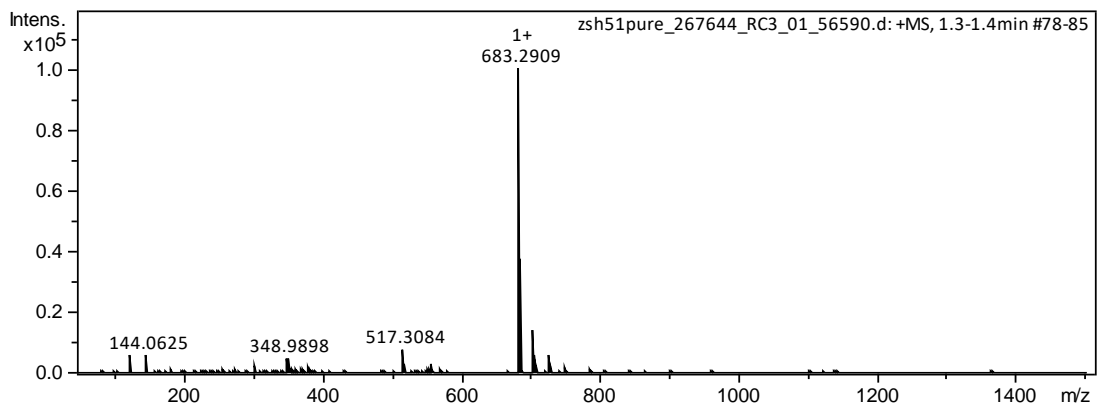

Purity : 94.48 %

3-A161

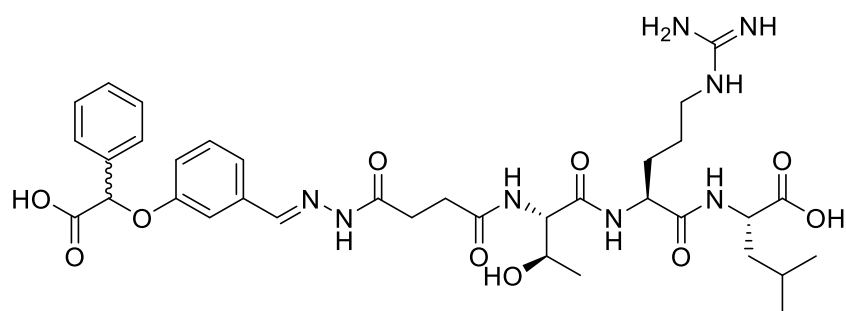

Chemical Formula: C<sub>35</sub>H<sub>48</sub>N<sub>8</sub>O<sub>10</sub>

| Exact Mass:<br>740.3493 Expected<br>[M+H <sup>+</sup> ] <sup>1+</sup> | Measured [M+H <sup>+</sup> ] <sup>1+</sup> | Expected [M+2H <sup>+</sup> ] <sup>2+</sup> | Measured [M+2H <sup>+</sup> ] <sup>2+</sup> |
|-----------------------------------------------------------------------|--------------------------------------------|---------------------------------------------|---------------------------------------------|
| 741.3566                                                              | 741.3563                                   | 371.1819                                    | 371.1821                                    |

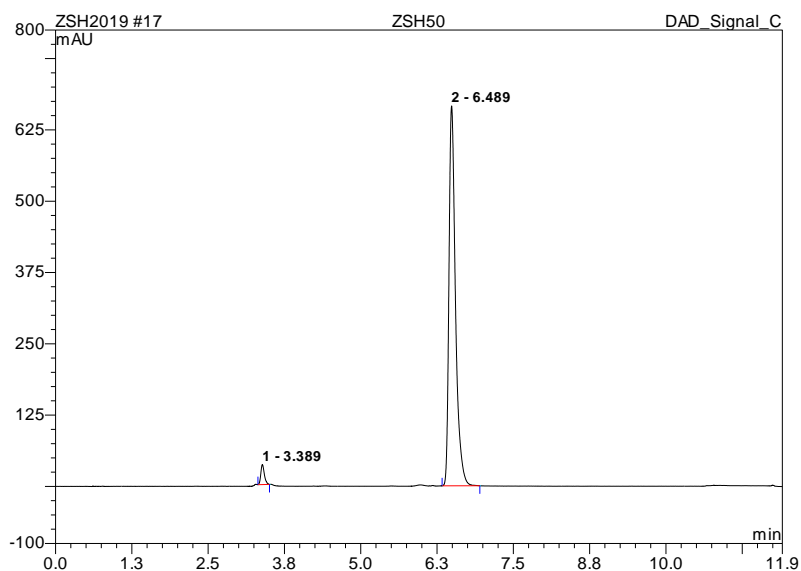

Note, that the absolute configuration and enantiomeric purity of A161 is unknown, a single peak in the HPLC chromatogram might indicate a single diastereoisomer or inseparable stereoisomers.

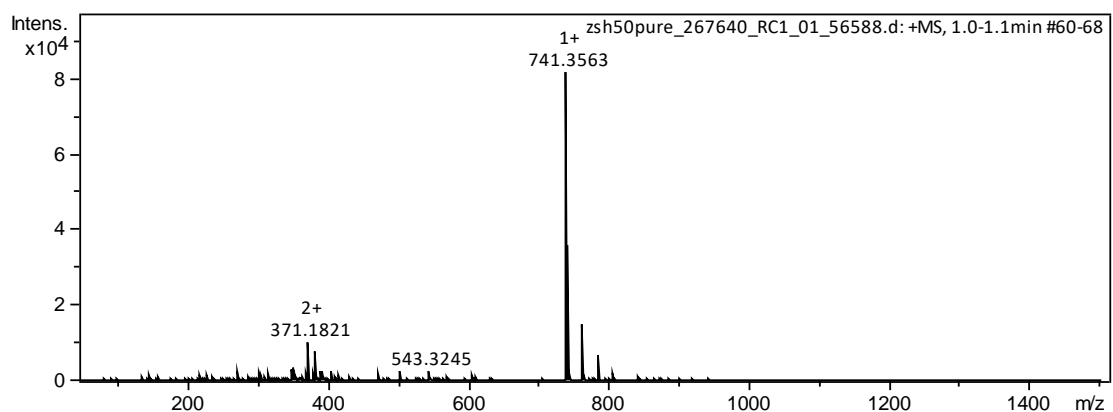

Purity: 97.22%

4-A161

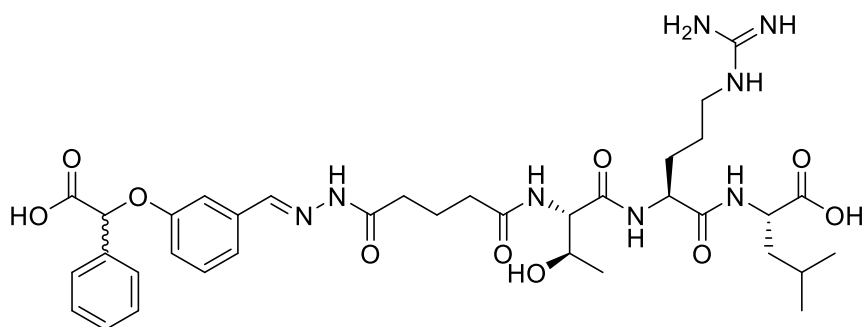

Chemical Formula: C<sub>36</sub>H<sub>50</sub>N<sub>8</sub>O<sub>10</sub>

| Exact Mass:<br>754.3650<br>Expected<br>[M+H <sup>+</sup> ] <sup>1+</sup> | Measured [M+H <sup>+</sup> ] <sup>1+</sup> | Expected<br>[M+H <sup>+</sup> +Na <sup>+</sup> ] <sup>2+</sup> | Measured<br>[M+H <sup>+</sup> +Na <sup>+</sup> ] <sup>2+</sup> |
|--------------------------------------------------------------------------|--------------------------------------------|----------------------------------------------------------------|----------------------------------------------------------------|
| 755.3723                                                                 | 755.3723                                   | 389.1815                                                       | 389.1802                                                       |

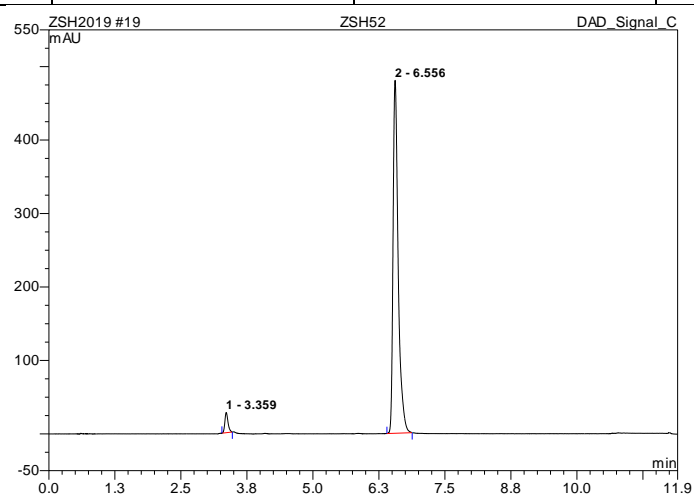

Note, that the absolute configuration and enantiomeric purity of A161 is unknown, a single peak in the HPLC chromatogram might indicate a single diastereoisomer or inseparable stereoisomers.

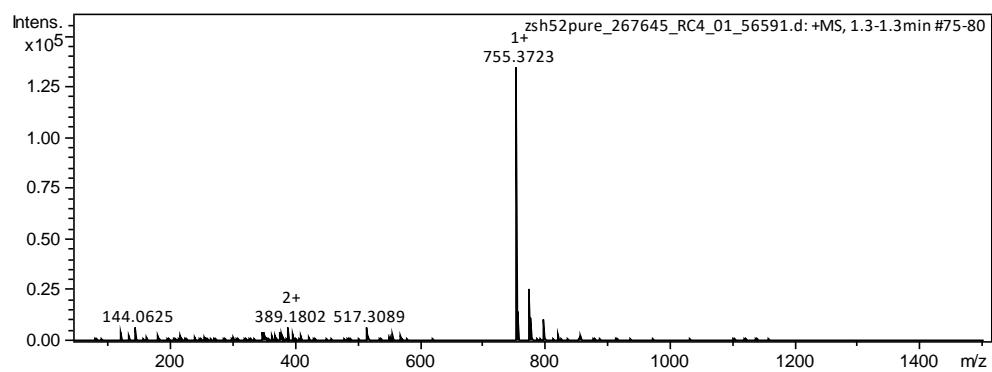

Purity: 96.6 %

## 2.11. References

- (1) Sander, T.; Freyss, J.; Von Korff, M.; Rufener, C. DataWarrior: An Open-Source Program for Chemistry Aware Data Visualization and Analysis. *J. Chem. Inf. Model.* **2015**, *55* (2), 460–473.
- (2) Im, Y. J.; Lee, J. H.; Park, S. H.; Park, S. J.; Rho, S. H.; Kang, G. B.; Kim, E.; Eom, S. H. Crystal Structure of the Shank PDZ-Ligand Complex Reveals a Class I PDZ Interaction and a Novel PDZ-PDZ Dimerization. *J. Biol. Chem.* **2003**, *278* (48), 48099–48104.
- (3) Vogrig, A.; Dorr, L.; Bouzidi, N.; Boucherle, B.; Wattiez, A. S.; Cassier, E.; Vallon, G.; Ripoche, I.; Abrunhosa-Thomas, I.; Marin, P.; Nauton, L.; Thery, V.; Courteix, C.; Lian, L. Y.; Ducki, S. Structure-Based Design of PDZ Ligands as Inhibitors of 5-HT<sub>2A</sub> Receptor/PSD-95 PDZ1 Domain Interaction Possessing Anti-Hyperalgesic Activity. *ACS Chem. Biol.* **2013**, *8* (10), 2209–2216.
- (4) Miles, J. A.; Yeo, D. J.; Rowell, P.; Rodriguez-Marin, S.; Pask, C. M.; Warriner, S. L.; Edwards, T. A.; Wilson, A. J. Hydrocarbon Constrained Peptides-Understanding Preorganisation and Binding Affinity. *Chem. Sci.* **2016**, *7* (6), 3694–3702.
- (5) Winter, G. Xia2: An Expert System for Macromolecular Crystallography Data Reduction. *J. Appl. Crystallogr.* **2010**, *43* (1), 186–190.
- (6) Winter, G.; Waterman, D. G.; Parkhurst, J. M.; Brewster, A. S.; Gildea, R. J.; Gerstel, M.; Fuentes-Montero, L.; Vollmar, M.; Michels-Clark, T.; Young, I. D.; Sauter, N. K.; Evans, G. DIALS: Implementation and Evaluation of a New Integration Package. *Acta Crystallogr. Sect. D Struct. Biol.* **2018**, *74* (2), 85–97.
- (7) Evans, P. Scaling and Assessment of Data Quality. *Acta Crystallogr. Sect. D Biol. Crystallogr.* **2006**, *62* (1), 72–82.
- (8) Evans, P. R.; Murshudov, G. N. How Good Are My Data and What Is the Resolution? *Acta Crystallogr. Sect. D Biol. Crystallogr.* **2013**, *69* (7), 1204–1214.
- (9) Vonrhein, C.; Flensburg, C.; Keller, P.; Sharff, A.; Smart, O.; Paciorek, W.; Womack, T.; Bricogne, G. Data Processing and Analysis with the AutoPROC Toolbox. *Acta Crystallogr. Sect. D Biol. Crystallogr.* **2011**, *67* (4), 293–302.
- (10) Kabsch, W. Xds. *Acta Crystallogr. Sect. D Biol. Crystallogr.* **2010**, *66* (2), 125–132.
- (11) Tickle, I.; Flensburg, C.; Keller, P.; Paciorek, W.; Cambridge, A. S.; Kingdom, U.; 2018, undefined. Staraniso.
- (12) McCoy, A. J.; Grosse-Kunstleve, R. W.; Adams, P. D.; Winn, M. D.; Storoni, L. C.; Read, R. J. Phaser Crystallographic Software. *J. Appl. Crystallogr.* **2007**, *40* (4), 658–674.
- (13) Vagin, A. A.; Steiner, R. A.; Lebedev, A. A.; Potterton, L.; McNicholas, S.; Long, F.; Murshudov, G. N. REFMAC5 Dictionary: Organization of Prior Chemical Knowledge and Guidelines for Its Use. *Acta Crystallogr. Sect. D Biol. Crystallogr.* **2004**, *60* (12 I), 2184–2195.
- (14) Emsley, P.; Lohkamp, B.; Scott, W. G.; Cowtan, K. Features and Development of Coot. *Acta Crystallogr. Sect. D Biol. Crystallogr.* **2010**, *66* (4), 486–501.
- (15) Winn, M. D.; Ballard, C. C.; Cowtan, K. D.; Dodson, E. J.; Emsley, P.; Evans, P. R.; Keegan, R. M.; Krissinel, E. B.; Leslie, A. G. W.; McCoy, A.; McNicholas, S. J.; Murshudov, G. N.; Pannu, N. S.; Potterton, E. A.; Powell, H. R.; Read, R. J.; Vagin, A.; Wilson, K. S. Overview of the CCP4 Suite and Current Developments. *Acta Crystallogr. Sect. D Biol. Crystallogr.*

- 2011**, 67 (4), 235–242.
- (16) Afonine, P. V.; Grosse-Kunstleve, R. W.; Echols, N.; Headd, J. J.; Moriarty, N. W.; Mustyakimov, M.; Terwilliger, T. C.; Urzhumtsev, A.; Zwart, P. H.; Adams, P. D. Towards Automated Crystallographic Structure Refinement with Phenix.Refine. *Acta Crystallogr. Sect. D Biol. Crystallogr.* **2012**, 68 (4), 352–367.
- (17) Chen, V. B.; Arendall, W. B.; Headd, J. J.; Keedy, D. A.; Immormino, R. M.; Kapral, G. J.; Murray, L. W.; Richardson, J. S.; Richardson, D. C. MolProbity: All-Atom Structure Validation for Macromolecular Crystallography. *Acta Crystallogr. Sect. D Biol. Crystallogr.* **2010**, 66 (1), 12–21.
- (18) Long, F.; Nicholls, R. A.; Emsley, P.; Gražulis, S.; Merkys, A.; Vaitkus, A.; Murshudov, G. N. AceDRG: A Stereochemical Description Generator for Ligands. *Acta Crystallogr. Sect. D Struct. Biol.* **2017**, 73 (2), 112–122.
- (19) Da Silva, A. W. S.; Vranken, W. F. ACPYPE-Antechamber Python Parser Interface. *BMC Res. notes* **2012**, 5 (1), 367.
- (20) Goddard, T.; reference, D. K.-T. is no corresponding record for this; 2008, undefined. Sparky 3. University of California, San Francisco, USA.
- (21) Kay, L. E.; Torchia, D. A.; Bax, A. Backbone Dynamics of Proteins As Studied by <sup>15</sup>N Inverse Detected Heteronuclear NMR Spectroscopy: Application to Staphylococcal Nuclease. *Biochemistry* **1989**, 28 (23), 8972–8979.
